# Supplementary material for: Patient discharge from intensive care: an updated scoping review to identify tools and practices to inform high-quality care
Source: PubMed Central journal article supplement (PMC8684123; doi:10.1186/s13054-021-03857-2), 2021-12-17
Supplement: 13054_2021_3857_MOESM4_ESM.pdf [file 13054_2021_3857_MOESM4_ESM.pdf]

**Additional File 4** – Article classification according to study population, describing framework elements, themes, and facilitators and barriers.

| Author (Year)         | Study Population | Phase(s) of Care | Donabedian <sup>a</sup> | IoM <sup>b</sup>            | Themes                                                                                                                        | Patient & Family Facilitators (F) & Barriers (B)                                                                                        | Provider Facilitators (F) & Barriers (B)                                 | Organizational Facilitators (F) & Barriers (B)                                                                        | Tool   |
|-----------------------|------------------|------------------|-------------------------|-----------------------------|-------------------------------------------------------------------------------------------------------------------------------|-----------------------------------------------------------------------------------------------------------------------------------------|--------------------------------------------------------------------------|-----------------------------------------------------------------------------------------------------------------------|--------|
| Abitağaoğlu (2019)[1] | Adult            | Follow-up        | Outcome                 | Safe                        | Adverse events, readmission, and mortality following discharge; Continuity of patient care;                                   | (B) Patient demographic and clinical characteristics;                                                                                   | (None)                                                                   | (F) Use of best practices;                                                                                            | (None) |
| Academia (2020)[2]    | Adult            | Execution        | Process                 | Efficient; Safe             | Adverse events, readmission, and mortality following discharge; Medication reconciliation;                                    | (B) Patient demographic and clinical characteristics;                                                                                   | (B) Lack of knowledge/ experience of provider;                           | (F) Use of best practices; (B) Hospital characteristics;                                                              | (None) |
| Agard (2019)[3]       | Adult            | Execution        | Process                 | Effective; Patient centered | Patient and family needs and experiences during discharge; Availability of complete and accurate discharge information;       | (F) Family engagement/ support; (F&B) (Lack of) Provider-patient communication; (B) Feelings of anxiety or embarrassment; Expectations; | (F) Critical care transition program; Knowledge/ experience of provider; | (F) Follow-up clinic or program; (B) Impact of current discharge practices; Hospital characteristics; Infrastructure; | (None) |
| Alberto (2014)[4]     | Adult            | Execution        | Process                 | Efficient; Patient centered | Planning for discharge; Standardizing the discharge process; Critical care transition program (nurse liaison, outreach team); | (F) Discharge education; Family engagement/ support;                                                                                    | (F) Critical care transition program;                                    | (F) Guidelines or policies; Education/ training of providers;                                                         | (None) |
| Allum (2017)[5]       | Adult            | Follow-up        | Outcome                 | Effective; Patient centered | Patient and family needs and experiences during discharge; Anxiety associated with discharge; Continuity of patient care;     | (F) Provider-patient communication; Discharge education; Family engagement/ support; Written communication; (F&B)                       | (F) Provider-provider communication; Critical care transition program;   | (F) Follow-up clinic or program;                                                                                      | (None) |

*Patient Discharge from the ICU*

| Author (Year)     | Study Population | Phase(s) of Care | Donabedian <sup>a</sup>     | IoM <sup>b</sup>                  | Themes                                                                                                                                                                    | Patient & Family Facilitators (F) & Barriers (B)                                                                                                                                        | Provider Facilitators (F) & Barriers (B) | Organizational Facilitators (F) & Barriers (B)                        | Tool   |
|-------------------|------------------|------------------|-----------------------------|-----------------------------------|---------------------------------------------------------------------------------------------------------------------------------------------------------------------------|-----------------------------------------------------------------------------------------------------------------------------------------------------------------------------------------|------------------------------------------|-----------------------------------------------------------------------|--------|
|                   |                  |                  |                             |                                   |                                                                                                                                                                           | Expectations; (B) Feelings of anxiety or embarrassment;                                                                                                                                 |                                          |                                                                       |        |
| Amass (2020)[6]   | Adult            | Follow-up        | Outcome                     | Effective; Safe; Patient centered | Patient and family needs and experiences during discharge; Discharge education for patients and families; Adverse events, readmission, and mortality following discharge; | (F) Provider-patient communication; Family engagement/support; Written communication; Patient/ family treated as a member of healthcare team; (B) Feelings of anxiety or embarrassment; | (F) Written documentation;               | (F) Impact of current discharge practices;                            | (None) |
| Anthes (2013)[7]  | Adult            | Execution        | Process                     | Safe                              | Availability of complete and accurate discharge information; Adverse events, readmission, and mortality following discharge; Medication reconciliation;                   | (None)                                                                                                                                                                                  | (F) Written documentation;               | (F) Use of best practices; Tools to facilitate discharge;             | (None) |
| Azevedo (2015)[8] | Adult            | Execution        | Structure; Outcome          | Safe                              | Planning for discharge; Adverse events, readmission, and mortality following discharge; Timeliness of discharge (time of day, delay);                                     | (B) Patient demographic and clinical characteristics;                                                                                                                                   | (None)                                   | (F&B) Admission location before ICU; (B) Time of discharge;           | (None) |
| Bagshaw (2020)[9] | Adult            | Execution        | Process; Structure; Outcome | Efficient; Safe; Timely           | Adverse events, readmission, and mortality following discharge; Timeliness of discharge (time of                                                                          | (None)                                                                                                                                                                                  | (None)                                   | (F) Discharge location; (B) Limited ICU and ward resources; Impact of | (None) |

*Patient Discharge from the ICU*

| Author (Year)      | Study Population | Phase(s) of Care               | Donabedian <sup>a</sup> | IoM <sup>b</sup>       | Themes                                                                                                                                                                                                                              | Patient & Family Facilitators (F) & Barriers (B)                                                                                           | Provider Facilitators (F) & Barriers (B)       | Organizational Facilitators (F) & Barriers (B)                                                           | Tool   |
|--------------------|------------------|--------------------------------|-------------------------|------------------------|-------------------------------------------------------------------------------------------------------------------------------------------------------------------------------------------------------------------------------------|--------------------------------------------------------------------------------------------------------------------------------------------|------------------------------------------------|----------------------------------------------------------------------------------------------------------|--------|
|                    |                  |                                |                         |                        | day, delay); Resource use during discharge;                                                                                                                                                                                         |                                                                                                                                            |                                                | current discharge practices; Costs of healthcare provided; Delay in discharge; Hospital or ICU capacity; |        |
| Baldwin (2013)[10] | Adult            | Follow-up                      | Outcome                 | Safe                   | Adverse events, readmission, and mortality following discharge;                                                                                                                                                                     | (F&B) Patient demographic and clinical characteristics; (B) Physical and psychological effects of illness; ICU or hospital length of stay; | (B) Lack of knowledge/ experience of provider; | (None)                                                                                                   | (None) |
| Balshi (2020)[11]  | Adult            | Execution; Follow-up           | Outcome                 | Safe                   | Adverse events, readmission, and mortality following discharge;                                                                                                                                                                     | (B) Patient demographic and clinical characteristics;                                                                                      | (None)                                         | (None)                                                                                                   | (None) |
| Basmaji (2019)[12] | Adult            | Execution; Follow-up           | Process; Outcome        | Safe                   | Adverse events, readmission, and mortality following discharge;                                                                                                                                                                     | (F&B) Patient demographic and clinical characteristics;                                                                                    | (None)                                         | (F&B) Discharge location;                                                                                | (None) |
| Bench (2013)[13]   | Adult            | Planning; Execution; Follow-up | Process; Outcome        | Safe; Patient centered | Patient and family needs and experiences during discharge; Availability of complete and accurate discharge information; Discharge education for patients and families; Planning for discharge; Standardizing the discharge process; | (F) Discharge education; Written communication; (B) Feelings of anxiety or embarrassment;                                                  | (None)                                         | (None)                                                                                                   | (None) |

*Patient Discharge from the ICU*

| Author (Year)    | Study Population | Phase(s) of Care     | Donabedian <sup>a</sup> | IoM <sup>b</sup>            | Themes                                                                                                                                                                                                         | Patient & Family Facilitators (F) & Barriers (B)                                                                                                                                           | Provider Facilitators (F) & Barriers (B)                                                                 | Organizational Facilitators (F) & Barriers (B) | Tool              |
|------------------|------------------|----------------------|-------------------------|-----------------------------|----------------------------------------------------------------------------------------------------------------------------------------------------------------------------------------------------------------|--------------------------------------------------------------------------------------------------------------------------------------------------------------------------------------------|----------------------------------------------------------------------------------------------------------|------------------------------------------------|-------------------|
|                  |                  |                      |                         |                             | Anxiety associated with discharge;                                                                                                                                                                             |                                                                                                                                                                                            |                                                                                                          |                                                |                   |
| Bench (2014)[14] | Adult            | Execution; Follow-up | Process; Structure      | Effective; Patient centered | Patient and family needs and experiences during discharge; Availability of complete and accurate discharge information; Planning for discharge; Anxiety associated with discharge; Continuity of patient care; | (F) Provider-patient communication; Discharge education; Family engagement/support; (B) Feelings of anxiety or embarrassment; Expectations; Physical and psychological effects of illness; | (F) Provider-provider communication; Knowledge/experience of provider; Clear roles and responsibilities; | (B) Lack of education/training of providers;   | Discharge letter  |
| Bench (2015)[15] | Adult            | Execution            | Process; Structure      | Patient centered            | Patient and family needs and experiences during discharge; Availability of complete and accurate discharge information; Discharge education for patients and families;                                         | (F) Provider-patient communication; Discharge education; Written communication;                                                                                                            | (F) Collaboration between ICU and ward; (B) Workload;                                                    | (None)                                         | Transfer brochure |
| Bench (2016)[16] | Adult            | Execution            | Process; Structure      | Efficient                   | Patient and family needs and experiences during discharge; Discharge education for patients and families; Resource use during discharge;                                                                       | (F) Provider-patient communication; Discharge education; Family engagement/support;                                                                                                        | (None)                                                                                                   | (F) Impact of current discharge practices;     | (None)            |
| Bloom (2019)[17] | Adult            | Execution; Follow-up | Process; Outcome        | Effective; Safe             | Adverse events, readmission, and mortality following discharge; Critical care transition program (nurse liaison, outreach team);                                                                               | (F) Discharge education;                                                                                                                                                                   | (F) Critical care transition program;                                                                    | (F&B) Discharge location;                      | (None)            |

*Patient Discharge from the ICU*

| Author (Year)    | Study Population | Phase(s) of Care     | Donabedian <sup>a</sup> | IoM <sup>b</sup>                       | Themes                                                                                                                                                                              | Patient & Family Facilitators (F) & Barriers (B)                                      | Provider Facilitators (F) & Barriers (B)                                                        | Organizational Facilitators (F) & Barriers (B)                                                                               | Tool   |
|------------------|------------------|----------------------|-------------------------|----------------------------------------|-------------------------------------------------------------------------------------------------------------------------------------------------------------------------------------|---------------------------------------------------------------------------------------|-------------------------------------------------------------------------------------------------|------------------------------------------------------------------------------------------------------------------------------|--------|
| Bose (2019)[18]  | Adult            | Execution; Follow-up | Outcome                 | Efficient; Patient centered ; Timely   | Adverse events, readmission, and mortality following discharge; Timeliness of discharge (time of day, delay);                                                                       | (None)                                                                                | (F) Provider-provider communication;                                                            | (F) Impact of current discharge practices; (B) Limited ICU and ward resources; Delay in discharge; Hospital or ICU capacity; | (None) |
| Bosma (2018)[19] | Adult            | Execution            | Process                 | Efficient; Safe                        | Planning for discharge; Resource use during discharge; Medication reconciliation;                                                                                                   | (None)                                                                                | (F) Provider-provider communication; Collaboration between ICU and ward;                        | (F) Use of best practices; Impact of current discharge practices; (B) Costs of healthcare provided;                          | (None) |
| Bosma (2019)[20] | Adult            | Follow-up            | Process; Outcome        | Efficient; Safe; Patient centered      | Availability of complete and accurate discharge information; Adverse events, readmission, and mortality following discharge; Continuity of patient care; Medication reconciliation; | (None)                                                                                | (F) Clear roles and responsibilities;                                                           | (F&B) Impact of current discharge practices;                                                                                 | (None) |
| Boyd (2018)[21]  | Adult            | Execution            | Structure               | Effective; Efficient; Patient centered | Patient and family needs and experiences during discharge; Availability of complete and accurate discharge information; Standardizing the discharge process;                        | (F) Provider-patient communication; Family engagement/support; Written communication; | (F) Provider-provider communication; Collaboration between ICU and ward; Written documentation; | (F) Tools to facilitate discharge;                                                                                           | (None) |

*Patient Discharge from the ICU*

| Author (Year)         | Study Population | Phase(s) of Care | Donabedian <sup>a</sup> | IoM <sup>b</sup>     | Themes                                                                                                                                                                                                                        | Patient & Family Facilitators (F) & Barriers (B)                                                     | Provider Facilitators (F) & Barriers (B)                                                        | Organizational Facilitators (F) & Barriers (B)                         | Tool   |
|-----------------------|------------------|------------------|-------------------------|----------------------|-------------------------------------------------------------------------------------------------------------------------------------------------------------------------------------------------------------------------------|------------------------------------------------------------------------------------------------------|-------------------------------------------------------------------------------------------------|------------------------------------------------------------------------|--------|
|                       |                  |                  |                         |                      | Medication reconciliation;                                                                                                                                                                                                    |                                                                                                      |                                                                                                 |                                                                        |        |
| Brown (2013)[22]      | Adult            | Follow-up        | Outcome                 | Safe                 | Adverse events, readmission, and mortality following discharge; Timeliness of discharge (time of day, delay);                                                                                                                 | (F&B) Patient demographic and clinical characteristics;                                              | (None)                                                                                          | (B) Time of discharge; Impact of current discharge practices;          | (None) |
| Brown (2018)[23]      | Adult            | Execution        | Process                 | Patient centered     | Availability of complete and accurate discharge information; Evaluating patient readiness for discharge; Continuity of patient care;                                                                                          | (F&B) (Lack of) Provider-patient communication;                                                      | (F) Provider-provider communication; (B) Lack of knowledge/experience of provider;              | (None)                                                                 | (None) |
| Chaboyer (2012)[24]   | Adult            | Execution        | Process                 | Efficient; Timely    | Standardizing the discharge process; Adverse events, readmission, and mortality following discharge; Timeliness of discharge (time of day, delay); Evaluating patient readiness for discharge; Resource use during discharge; | (F) Patient demographic and clinical characteristics;                                                | (F) Provider-provider communication; Collaboration between ICU and ward; Written documentation; | (B) Time of discharge; Delay in discharge;                             | (None) |
| Chatterjee (2019)[25] | Adult            | Execution        | Process; Outcome        | Safe; Timely         | Adverse events, readmission, and mortality following discharge; Timeliness of discharge (time of day, delay);                                                                                                                 | (B) Patient demographic and clinical characteristics; Physical and psychological effects of illness; | (B) Workload;                                                                                   | (F&B) Time of discharge; (B) Limited ICU and ward resources; Staffing; | (None) |
| Choi (2016)[26]       | Adult            | Follow-up        | Outcome                 | Effective; Efficient | Adverse events, readmission, and mortality following discharge; Critical care transition program                                                                                                                              | (F&B) Patient demographic and clinical characteristics;                                              | (F) Critical care transition program; Knowledge/                                                | (None)                                                                 | (None) |

*Patient Discharge from the ICU*

| Author (Year)      | Study Population | Phase(s) of Care    | Donabedian <sup>a</sup> | IoM <sup>b</sup>             | Themes                                                                                                                                                               | Patient & Family Facilitators (F) & Barriers (B)                                                                                                                                                             | Provider Facilitators (F) & Barriers (B) | Organizational Facilitators (F) & Barriers (B)                 | Tool   |
|--------------------|------------------|---------------------|-------------------------|------------------------------|----------------------------------------------------------------------------------------------------------------------------------------------------------------------|--------------------------------------------------------------------------------------------------------------------------------------------------------------------------------------------------------------|------------------------------------------|----------------------------------------------------------------|--------|
|                    |                  |                     |                         |                              | (nurse liaison, outreach team);                                                                                                                                      |                                                                                                                                                                                                              | experience of provider;                  |                                                                |        |
| Choi (2018)[27]    | Adult            | Follow-up           | Outcome                 | Patient centered             | Patient and family needs and experiences during discharge; Discharge education for patients and families; Planning for discharge; Anxiety associated with discharge; | (F) Family engagement/support; (F&B) Expectations; (B) Feelings of anxiety or embarrassment;                                                                                                                 | (None)                                   | (None)                                                         | (None) |
| Choi (2020)[28]    | Adult            | Execution           | Process                 | Patient centered             | Patient and family needs and experiences during discharge; Anxiety associated with discharge;                                                                        | (F) Discharge education; Family engagement/support; (B) Patient demographic and clinical characteristics; Feelings of anxiety or embarrassment; Expectations; Physical and psychological effects of illness; | (None)                                   | (None)                                                         | (None) |
| Churpek (2013)[29] | Adult            | Execution           | Outcome                 | Effective; Efficient; Timely | Adverse events, readmission, and mortality following discharge; Timeliness of discharge (time of day, delay); Resource use during discharge;                         | (B) Patient demographic and clinical characteristics;                                                                                                                                                        | (None)                                   | (B) Impact of current discharge practices; Delay in discharge; | (None) |
| Coombs (2015)[30]  | Adult            | Planning; Execution | Process; Structure      | Patient centered             | Patient and family needs and experiences during discharge; Planning for discharge; Continuity of patient care; Autonomy;                                             | (F) Provider-patient communication;                                                                                                                                                                          | (F) Provider-provider communication;     | (F) Follow-up clinic or program;                               | (None) |

*Patient Discharge from the ICU*

| Author (Year)       | Study Population | Phase(s) of Care     | Donabedian <sup>a</sup> | IoM <sup>b</sup> | Themes                                                                                                                 | Patient & Family Facilitators (F) & Barriers (B)                                                                                                                                  | Provider Facilitators (F) & Barriers (B)                                  | Organizational Facilitators (F) & Barriers (B)                                    | Tool                 |
|---------------------|------------------|----------------------|-------------------------|------------------|------------------------------------------------------------------------------------------------------------------------|-----------------------------------------------------------------------------------------------------------------------------------------------------------------------------------|---------------------------------------------------------------------------|-----------------------------------------------------------------------------------|----------------------|
| Coombs (2017)[31]   | Adult            | Evaluation           | Process                 | Patient centered | Planning for discharge; Evaluating patient readiness for discharge;                                                    | (F) Patient demographic and clinical characteristics;                                                                                                                             | (None)                                                                    | (F) Impact of current discharge practices;                                        | (None)               |
| Coon (2015)[32]     | Adult            | Execution            | Process                 | Efficient        | Adverse events, readmission, and mortality following discharge; Continuity of patient care; Medication reconciliation; | (None)                                                                                                                                                                            | (F) Provider-provider communication; Written documentation; (B) Workload; | (None)                                                                            | Guideline/ checklist |
| Correa (2018)[33]   | Adult            | Planning; Follow-up  | Process                 | Effective        | Evaluating patient readiness for discharge;                                                                            | (F&B) Patient demographic and clinical characteristics;                                                                                                                           | (F) Clinical judgement or decision making;                                | (None)                                                                            | (None)               |
| Coughlin (2018)[34] | Adult            | Execution; Follow-up | Process; Outcome        | Safe; Timely     | Adverse events, readmission, and mortality following discharge; Timeliness of discharge (time of day, delay);          | (None)                                                                                                                                                                            | (None)                                                                    | (B) Time of discharge; Impact of current discharge practices; Discharge location; | (None)               |
| Corner (2014)[35]   | Adult            | Follow-up            | Outcome                 | Efficient; Safe  | Adverse events, readmission, and mortality following discharge;                                                        | (B) Patient demographic and clinical characteristics;                                                                                                                             | (F) Clear roles and responsibilities;                                     | (None)                                                                            | (None)               |
| Cypress (2013)[36]  | Adult            | Execution            | Process                 | Effective        | Patient and family needs and experiences during discharge;                                                             | (F) Discharge education; Expectations; (B) Patient demographic and clinical characteristics; Feelings of anxiety or embarrassment; Physical and psychological effects of illness; | (F) Collaboration between ICU and ward;                                   | (None)                                                                            | (None)               |



*Patient Discharge from the ICU*

| Author (Year)         | Study Population | Phase(s) of Care     | Donabedian <sup>a</sup>     | IoM <sup>b</sup>                  | Themes                                                                                                                                                                                                                                       | Patient & Family Facilitators (F) & Barriers (B)         | Provider Facilitators (F) & Barriers (B)                                                                                                                                                                                    | Organizational Facilitators (F) & Barriers (B)                                                                | Tool                 |
|-----------------------|------------------|----------------------|-----------------------------|-----------------------------------|----------------------------------------------------------------------------------------------------------------------------------------------------------------------------------------------------------------------------------------------|----------------------------------------------------------|-----------------------------------------------------------------------------------------------------------------------------------------------------------------------------------------------------------------------------|---------------------------------------------------------------------------------------------------------------|----------------------|
| D'Angelo (2019)[37]   | Adult            | Execution            | Process                     | Efficient; Safe                   | Standardizing the discharge process; Medication reconciliation;                                                                                                                                                                              | (B) ICU or hospital length of stay;                      | (F) Clinical judgement or decision making;                                                                                                                                                                                  | (F) Guidelines or policies;                                                                                   | Guideline/ checklist |
| Darlington (2015)[38] | Adult            | Evaluation; Planning | Process                     | Effective; Patient centered       | Planning for discharge; Autonomy;                                                                                                                                                                                                            | (F&B) Patient demographic and clinical characteristics;  | (None)                                                                                                                                                                                                                      | (F) Use of best practices; Tools to facilitate discharge; (B) Impact of current discharge practices;          | (None)               |
| de Grood (2018)[39]   | Adult            | Planning; Execution  | Structure                   | Efficient; Safe; Patient centered | Availability of complete and accurate discharge information; Discharge education for patients and families; Planning for discharge; Timeliness of discharge (time of day, delay); Resource use during discharge; Continuity of patient care; | (F) Provider-patient communication; Discharge education; | (F) Provider-provider communication; Critical care transition program; Collaboration between ICU and ward; Knowledge/ experience of provider; Written documentation; Clear roles and responsibilities; Provider leadership; | (F) Tools to facilitate discharge; (B) Limited ICU and ward resources; Time of discharge; Delay in discharge; | (None)               |
| Detsky (2015)[40]     | Adult            | Execution            | Process; Structure; Outcome | Effective; Safe                   | Availability of complete and accurate discharge information; Standardizing the discharge process; Adverse events, readmission, and mortality following                                                                                       | (None)                                                   | (F) Provider-provider communication; Collaboration between ICU and ward;                                                                                                                                                    | (F) Tools to facilitate discharge; (B) Impact of current discharge practices;                                 | (None)               |

*Patient Discharge from the ICU*

| Author (Year)         | Study Population | Phase(s) of Care     | Donabedian <sup>a</sup>     | IoM <sup>b</sup>  | Themes                                                                                                                                                                   | Patient & Family Facilitators (F) & Barriers (B)        | Provider Facilitators (F) & Barriers (B)   | Organizational Facilitators (F) & Barriers (B)                                                                                                                                   | Tool   |
|-----------------------|------------------|----------------------|-----------------------------|-------------------|--------------------------------------------------------------------------------------------------------------------------------------------------------------------------|---------------------------------------------------------|--------------------------------------------|----------------------------------------------------------------------------------------------------------------------------------------------------------------------------------|--------|
|                       |                  |                      |                             |                   | discharge; Resource use during discharge; Continuity of patient care;                                                                                                    |                                                         |                                            |                                                                                                                                                                                  |        |
| Ebrahimian (2018)[41] | Adult            | Evaluation           | Process; Outcome            | Effective; Safe   | Planning for discharge; Standardizing the discharge process; Adverse events, readmission, and mortality following discharge; Evaluating patient readiness for discharge; | (F&B) Patient demographic and clinical characteristics; | (F) Clinical judgement or decision making; | (F) Tools to facilitate discharge;                                                                                                                                               | (None) |
| Edenharter (2019)[42] | Adult            | Execution            | Process; Structure          | Efficient; Timely | Timeliness of discharge (time of day, delay); Resource use during discharge;                                                                                             | (None)                                                  | (None)                                     | (B) Limited ICU and ward resources; Impact of current discharge practices; Costs of healthcare provided; Delay in discharge; Hospital characteristics; Hospital or ICU capacity; | (None) |
| El Hadidi (2020)[43]  | Adult            | Execution            | Process                     | Safe              | Medication reconciliation;                                                                                                                                               | (F) Patient demographic and clinical characteristics;   | (F) Multidisciplinary team;                | (F) Guidelines or policies; Use of best practices; (B) Impact of current discharge practices;                                                                                    | (None) |
| Enger (2018)[44]      | Adult            | Execution; Follow-up | Process; Structure; Outcome | Effective; Safe   | Availability of complete and accurate discharge                                                                                                                          | (B) Feelings of anxiety or embarrassment;               | (F) Provider-provider communication;       | (B) Limited ICU and ward resources; (B)                                                                                                                                          | (None) |

*Patient Discharge from the ICU*

| Author (Year)        | Study Population | Phase(s) of Care               | Donabedian <sup>a</sup> | IoM <sup>b</sup> | Themes                                                                                                                                                                     | Patient & Family Facilitators (F) & Barriers (B)      | Provider Facilitators (F) & Barriers (B)                                                              | Organizational Facilitators (F) & Barriers (B)                                                        | Tool                 |
|----------------------|------------------|--------------------------------|-------------------------|------------------|----------------------------------------------------------------------------------------------------------------------------------------------------------------------------|-------------------------------------------------------|-------------------------------------------------------------------------------------------------------|-------------------------------------------------------------------------------------------------------|----------------------|
|                      |                  |                                |                         |                  | information; Planning for discharge; Anxiety associated with discharge; Continuity of patient care;                                                                        |                                                       | Collaboration between ICU and ward; Knowledge/experience of provider; (B) Workload; Provider anxiety; | Impact of current discharge practices;                                                                |                      |
| Fabes (2017)[45]     | Adult            | Planning; Execution; Follow-up | Structure; Outcome      | Efficient; Safe  | Planning for discharge; Standardizing the discharge process; Adverse events, readmission, and mortality following discharge; Evaluating patient readiness for discharge;   | (B) Patient demographic and clinical characteristics; | (None)                                                                                                | (F) Guidelines or policies; Tools to facilitate discharge; (B) Impact of current discharge practices; | Discharge assessment |
| Fergusson (2020)[46] | Adult            | Execution; Follow-up           | Structure; Outcome      | Effective; Safe  | Availability of complete and accurate discharge information; Adverse events, readmission, and mortality following discharge;                                               | (None)                                                | (B) Workload;                                                                                         | (F&B) Time of discharge; (B) Hospital or ICU capacity;                                                | (None)               |
| Forster (2020)[47]   | Adult            | Follow-up                      | Outcome                 | Safe; Timely     | Availability of complete and accurate discharge information; Adverse events, readmission, and mortality following discharge; Timeliness of discharge (time of day, delay); | (None)                                                | (None)                                                                                                | (B) Time of discharge; Delay in discharge; Hospital characteristics; Hospital or ICU capacity;        | (None)               |
| Gantner (2014)[48]   | Adult            | Execution; Follow-up           | Structure; Outcome      | Safe; Timely     | Adverse events, readmission, and mortality following discharge; Timeliness                                                                                                 | (B) Patient demographic and clinical characteristics; | (None)                                                                                                | (F) Impact of current discharge practices; (F&B)                                                      | (None)               |

*Patient Discharge from the ICU*

| Author (Year)                  | Study Population | Phase(s) of Care      | Donabedian <sup>a</sup> | IoM <sup>b</sup>        | Themes                                                                                                                             | Patient & Family Facilitators (F) & Barriers (B)      | Provider Facilitators (F) & Barriers (B)                                       | Organizational Facilitators (F) & Barriers (B)                           | Tool                 |
|--------------------------------|------------------|-----------------------|-------------------------|-------------------------|------------------------------------------------------------------------------------------------------------------------------------|-------------------------------------------------------|--------------------------------------------------------------------------------|--------------------------------------------------------------------------|----------------------|
|                                |                  |                       |                         |                         | of discharge (time of day, delay);                                                                                                 |                                                       |                                                                                | Time of discharge; (B) Costs of healthcare provided; Delay in discharge; |                      |
| Garland and Connors (2013)[49] | Adult            | Follow-up             | Outcome                 | Safe; Timely            | Adverse events, readmission, and mortality following discharge; Timeliness of discharge (time of day, delay);                      | (B) Patient demographic and clinical characteristics; | (None)                                                                         | (B) Delay in discharge; Discharge location; Hospital characteristics;    | (None)               |
| Gilbert (2017)[50]             | Adult            | Execution; Follow-up  | Outcome                 | Safe                    | Continuity of patient care; Medication reconciliation;                                                                             | (None)                                                | (None)                                                                         | (None)                                                                   | (None)               |
| Gimpel (2019)[51]              | Adult            | Execution; Follow-up  | Outcome                 | Effective; Safe; Timely | Availability of complete and accurate discharge information; Planning for discharge; Timeliness of discharge (time of day, delay); | (None)                                                | (F) Collaboration between ICU and ward; Clinical judgement or decision making; | (B) Delay in discharge;                                                  | (None)               |
| Goldstein (2017)[52]           | Adult            | Planning; Execution   | Structure               | Efficient; Safe         | Availability of complete and accurate discharge information; Planning for discharge; Resource use during discharge;                | (None)                                                | (F&B) (Lack of) Provider-provider communication;                               | (None)                                                                   | Discharge assessment |
| Gotur (2018)[53]               | Adult            | Evaluation; Follow-up | Outcome                 | Efficient; Timely       | Adverse events, readmission, and mortality following discharge; Evaluating patient readiness for discharge;                        | (B) Patient demographic and clinical characteristics; | (None)                                                                         | (None)                                                                   | (None)               |
| Häggström (2014)[54]           | Adult            | Execution             | Process                 | Patient centered        | Patient and family needs and experiences during                                                                                    | (F) Provider-patient communication;                   | (F) Provider-provider communication;                                           | (None)                                                                   | (None)               |

Patient Discharge from the ICU

| Author (Year)          | Study Population | Phase(s) of Care               | Donabedian <sup>a</sup> | IoM <sup>b</sup>                  | Themes                                                                                                                                                                                                                                   | Patient & Family Facilitators (F) & Barriers (B)                                     | Provider Facilitators (F) & Barriers (B)                                                                                                                                                                   | Organizational Facilitators (F) & Barriers (B)                                                                            | Tool          |
|------------------------|------------------|--------------------------------|-------------------------|-----------------------------------|------------------------------------------------------------------------------------------------------------------------------------------------------------------------------------------------------------------------------------------|--------------------------------------------------------------------------------------|------------------------------------------------------------------------------------------------------------------------------------------------------------------------------------------------------------|---------------------------------------------------------------------------------------------------------------------------|---------------|
|                        |                  |                                |                         |                                   | discharge; Availability of complete and accurate discharge information; Discharge education for patients and families;                                                                                                                   | Discharge education; Family engagement/support; Written communication; Expectations; | Collaboration between ICU and ward; (B) Workload;                                                                                                                                                          |                                                                                                                           |               |
| Hägström (2018)[55]    | Adult            | Execution                      | Process; Structure      | Effective; Safe; Patient centered | Availability of complete and accurate discharge information; Critical care transition program (nurse liaison, outreach team); Evaluating patient readiness for discharge; Continuity of patient care; Discharge education for providers; | (None)                                                                               | (F) Provider-provider communication; Critical care transition program; Collaboration between ICU and ward; Written documentation; Clinical judgement or decision making; Clear roles and responsibilities; | (F) Impact of current discharge practices; (B) Limited ICU and ward resources;                                            | (None)        |
| Hajalizadeh (2020)[56] | Adult            | Planning; Execution; Follow-up | Process; Structure      | Patient centered                  | Patient and family needs and experiences during discharge; Discharge education for patients and families; Autonomy;                                                                                                                      | (F) Provider-patient communication; Discharge education; Family engagement/support;  | (None)                                                                                                                                                                                                     | (None)                                                                                                                    | (None)        |
| Halvorson (2016)[57]   | Adult            | Execution                      | Process; Structure      | Efficient; Timely                 | Standardizing the discharge process; Timeliness of discharge (time of day, delay); Resource use during discharge;                                                                                                                        | (None)                                                                               | (None)                                                                                                                                                                                                     | (F) Guidelines or policies; Tools to facilitate discharge; (B) Impact of current discharge practices; Delay in discharge; | Transfer tool |

| Author (Year)         | Study Population | Phase(s) of Care                           | Donabedian <sup>a</sup> | IoM <sup>b</sup>             | Themes                                                                                                                                                                                                                                                                                                      | Patient & Family Facilitators (F) & Barriers (B)                                                      | Provider Facilitators (F) & Barriers (B)                                                                                           | Organizational Facilitators (F) & Barriers (B)                                                                                                                                                                                                                              | Tool   |
|-----------------------|------------------|--------------------------------------------|-------------------------|------------------------------|-------------------------------------------------------------------------------------------------------------------------------------------------------------------------------------------------------------------------------------------------------------------------------------------------------------|-------------------------------------------------------------------------------------------------------|------------------------------------------------------------------------------------------------------------------------------------|-----------------------------------------------------------------------------------------------------------------------------------------------------------------------------------------------------------------------------------------------------------------------------|--------|
| Haraldsson (2015)[58] | Adult            | Follow-up                                  | Outcome                 | Patient centered             | Anxiety associated with discharge; Continuity of patient care;                                                                                                                                                                                                                                              | (B) Anxiety; (B) Feelings of anxiety or embarrassment; Physical and psychological effects of illness; | (None)                                                                                                                             | (None)                                                                                                                                                                                                                                                                      | (None) |
| Harlan (2020)[59]     | Adult            | Execution; Follow-up                       | Outcome                 | Effective; Safe; Timely      | Adverse events, readmission, and mortality following discharge; Evaluating patient readiness for discharge;                                                                                                                                                                                                 | (B) Patient demographic and clinical characteristics;                                                 | (F) Knowledge/ experience of provider; Clinical judgement or decision making;                                                      | (F) Impact of current discharge practices; (B) Hospital or ICU capacity;                                                                                                                                                                                                    | (None) |
| Herling (2019)[60]    | Adult            | Follow-up                                  | Outcome                 | Patient centered             | Continuity of patient care; Autonomy;                                                                                                                                                                                                                                                                       | (F) Excited, joyous to be leaving ICU; (B) Feelings of anxiety or embarrassment;                      | (None)                                                                                                                             | (None)                                                                                                                                                                                                                                                                      | (None) |
| Herve (2020)[61]      | Adult            | Evaluation; Planning; Execution; Follow-up | Structure; Outcome      | Effective; Efficient; Timely | Patient and family needs and experiences during discharge; Availability of complete and accurate discharge information; Planning for discharge; Standardizing the discharge process; Adverse events, readmission, and mortality following discharge; Continuity of patient care; Medication reconciliation; | (F) Family engagement/ support; Written communication;                                                | (F) Provider-provider communication; Written documentation; Multidisciplinary team; (B) Lack of knowledge/ experience of provider; | (F) Guidelines or policies; Use of best practices; Impact of current discharge practices; Tools to facilitate discharge; Follow-up clinic or program; (B) Limited ICU and ward resources; Time of discharge; Delay in discharge; Discharge location; Staffing; Reduction in | (None) |

*Patient Discharge from the ICU*

| Author (Year)        | Study Population | Phase(s) of Care               | Donabedian <sup>a</sup> | IoM <sup>b</sup>     | Themes                                                                                                                                                                                                                                   | Patient & Family Facilitators (F) & Barriers (B)      | Provider Facilitators (F) & Barriers (B)                                                                                                                                                                  | Organizational Facilitators (F) & Barriers (B)             | Tool          |
|----------------------|------------------|--------------------------------|-------------------------|----------------------|------------------------------------------------------------------------------------------------------------------------------------------------------------------------------------------------------------------------------------------|-------------------------------------------------------|-----------------------------------------------------------------------------------------------------------------------------------------------------------------------------------------------------------|------------------------------------------------------------|---------------|
|                      |                  |                                |                         |                      |                                                                                                                                                                                                                                          |                                                       |                                                                                                                                                                                                           | technology and monitoring;                                 |               |
| Heselmans (2015)[62] | Adult            | Execution                      | Process; Outcome        | Effective; Safe      | Adverse events, readmission, and mortality following discharge; Medication reconciliation;                                                                                                                                               | (None)                                                | (F) Clear roles and responsibilities;                                                                                                                                                                     | (None)                                                     | Transfer tool |
| Hoffman (2017)[63]   | Adult            | Planning; Execution; Follow-up | Process; Outcome        | Effective; Safe      | Planning for discharge; Standardizing the discharge process; Adverse events, readmission, and mortality following discharge;                                                                                                             | (None)                                                | (F) Provider-provider communication; Collaboration between ICU and ward; Written documentation;                                                                                                           | (F) Guidelines or policies; Tools to facilitate discharge; | Transfer tool |
| Holland (2012)[64]   | Adult            | Planning                       | Process                 | Patient centered     | Availability of complete and accurate discharge information; Planning for discharge; Standardizing the discharge process;                                                                                                                | (F) Patient demographic and clinical characteristics; | (F) Provider-provider communication; Written documentation;                                                                                                                                               | (None)                                                     | (None)        |
| James (2013)[65]     | Adult            | Evaluation; Execution          | Process; Structure      | Effective; Efficient | Availability of complete and accurate discharge information; Standardizing the discharge process; Anxiety associated with discharge; Critical care transition program (nurse liaison, outreach team); Discharge education for providers; | (None)                                                | (F) Provider-provider communication; Critical care transition program; Collaboration between ICU and ward; Clinical judgement or decision making; Clear roles and responsibilities; (B) Provider anxiety; | (None)                                                     | (None)        |
| Jensen (2019)[66]    | Adult            | Follow-up                      | Outcome                 | Effective; Safe      | Adverse events, readmission, and                                                                                                                                                                                                         | (None)                                                | (F) Critical care transition                                                                                                                                                                              | (None)                                                     | (None)        |

*Patient Discharge from the ICU*

| Author (Year)          | Study Population | Phase(s) of Care     | Donabedian <sup>a</sup> | IoM <sup>b</sup>     | Themes                                                                                                                                                       | Patient & Family Facilitators (F) & Barriers (B)                                      | Provider Facilitators (F) & Barriers (B)                                                                                                                         | Organizational Facilitators (F) & Barriers (B)                | Tool   |
|------------------------|------------------|----------------------|-------------------------|----------------------|--------------------------------------------------------------------------------------------------------------------------------------------------------------|---------------------------------------------------------------------------------------|------------------------------------------------------------------------------------------------------------------------------------------------------------------|---------------------------------------------------------------|--------|
|                        |                  |                      |                         |                      | mortality following discharge; Critical care transition program (nurse liaison, outreach team); Continuity of patient care;                                  |                                                                                       | program; Collaboration between ICU and ward; Written documentation; (F&B) (Lack of) Provider-provider communication; (Lack of) Knowledge/experience of provider; |                                                               |        |
| Jeong (2019)[67]       | Adult            | Follow-up            | Outcome                 | Effective; Safe      | Adverse events, readmission, and mortality following discharge;                                                                                              | (B) Patient demographic and clinical characteristics; ICU or hospital length of stay; | (None)                                                                                                                                                           | (B) Time of discharge; Impact of current discharge practices; | (None) |
| Jolley (2019)[68]      | Adult            | Execution; Follow-up | Outcome                 | Effective; Safe      | Adverse events, readmission, and mortality following discharge; Continuity of patient care;                                                                  | (B) Patient demographic and clinical characteristics;                                 | (F) Clinical judgement or decision making;                                                                                                                       | (F&B) Discharge location;                                     | (None) |
| Jonasdottir (2015)[69] | Adult            | Follow-up            | Outcome                 | Efficient            | Critical care transition program (nurse liaison, outreach team); Continuity of patient care;                                                                 | (None)                                                                                | (F) Critical care transition program;                                                                                                                            | (None)                                                        | (None) |
| Jonasdottir (2018)[70] | Adult            | Follow-up            | Outcome                 | Effective; Efficient | Adverse events, readmission, and mortality following discharge; Critical care transition program (nurse liaison, outreach team); Continuity of patient care; | (B) Patient demographic and clinical characteristics;                                 | (F) Critical care transition program; Collaboration between ICU and ward; (B) Workload; Provider anxiety;                                                        | (None)                                                        | (None) |



*Patient Discharge from the ICU*

| Author (Year)       | Study Population | Phase(s) of Care               | Donabedian <sup>a</sup> | IoM <sup>b</sup>          | Themes                                                                                                                                                                                                                                                        | Patient & Family Facilitators (F) & Barriers (B)                                                                                                            | Provider Facilitators (F) & Barriers (B) | Organizational Facilitators (F) & Barriers (B)                              | Tool             |
|---------------------|------------------|--------------------------------|-------------------------|---------------------------|---------------------------------------------------------------------------------------------------------------------------------------------------------------------------------------------------------------------------------------------------------------|-------------------------------------------------------------------------------------------------------------------------------------------------------------|------------------------------------------|-----------------------------------------------------------------------------|------------------|
| Kastrup (2013)[71]  | Adult            | Follow-up                      | Outcome                 | Safe; Equal               | Adverse events, readmission, and mortality following discharge;                                                                                                                                                                                               | (B) Patient demographic and clinical characteristics;                                                                                                       | (None)                                   | (F) Admission location before ICU;                                          | (None)           |
| Kheir (2016)[72]    | Adult            | Follow-up                      | Process; Outcome        | Effective; Safe           | Adverse events, readmission, and mortality following discharge; Critical care transition program (nurse liaison, outreach team);                                                                                                                              | (None)                                                                                                                                                      | (F) Critical care transition program;    | (None)                                                                      | (None)           |
| King (2019)[73]     | Adult            | Planning; Execution; Follow-up | Process; Outcome        | Patient centered ; Timely | Patient and family needs and experiences during discharge; Availability of complete and accurate discharge information; Discharge education for patients and families; Planning for discharge; Anxiety associated with discharge; Continuity of patient care; | (F) Discharge education; Family engagement/ support; (B) Feelings of anxiety or embarrassment; Expectations; Physical and psychological effects of illness; | (None)                                   | (F) Impact of current discharge practices; Discharge location;              | (None)           |
| Klepstad (2019)[74] | Adult            | Follow-up                      | Outcome                 | Safe                      | Adverse events, readmission, and mortality following discharge;                                                                                                                                                                                               | (B) Patient demographic and clinical characteristics;                                                                                                       | (None)                                   | (None)                                                                      | (None)           |
| Kohn (2019)[75]     | Adult            | Execution; Follow-up           | Outcome                 | Safe; Timely              | Timeliness of discharge (time of day, delay); Resource use during discharge; Continuity of patient care;                                                                                                                                                      | (None)                                                                                                                                                      | (None)                                   | (B) Limited ICU and ward resources; Delay in discharge; Discharge location; | (None)           |
| Kram (2019)[76]     | Adult            | Planning                       | Structure; Outcome      | Efficient; Safe;          | Planning for discharge; Resource use during discharge;                                                                                                                                                                                                        | (None)                                                                                                                                                      | (F) Written documentation;               | (F) Tools to facilitate discharge;                                          | Discharge letter |

*Patient Discharge from the ICU*

| Author (Year)         | Study Population | Phase(s) of Care | Donabedian <sup>a</sup> | IoM <sup>b</sup>            | Themes                                                                                                                                    | Patient & Family Facilitators (F) & Barriers (B)                                            | Provider Facilitators (F) & Barriers (B)   | Organizational Facilitators (F) & Barriers (B)         | Tool   |
|-----------------------|------------------|------------------|-------------------------|-----------------------------|-------------------------------------------------------------------------------------------------------------------------------------------|---------------------------------------------------------------------------------------------|--------------------------------------------|--------------------------------------------------------|--------|
|                       |                  |                  |                         | Patient centered            | Continuity of patient care; Medication reconciliation;                                                                                    |                                                                                             |                                            |                                                        |        |
| Kram (2015)[77]       | Adult            | Follow-up        | Outcome                 | Effective; Safe             | Adverse events, readmission, and mortality following discharge; Medication reconciliation;                                                | (None)                                                                                      | (F) Clear roles and responsibilities;      | (None)                                                 | (None) |
| Kuang-Ming (2020)[78] | Adult            | Follow-up        | Outcome                 | Patient centered ; Timely   | Adverse events, readmission, and mortality following discharge; Timeliness of discharge (time of day, delay); Continuity of patient care; | (B) Patient demographic and clinical characteristics; Feelings of anxiety or embarrassment; | (None)                                     | (F&B) Hospital characteristics; (B) Time of discharge; | (None) |
| Küçükosman (2020)[79] | Adult            | Follow-up        | Outcome                 | Safe                        | Adverse events, readmission, and mortality following discharge; Resource use during discharge;                                            | (B) Patient demographic and clinical characteristics;                                       | (None)                                     | (None)                                                 | (None) |
| Lam (2017)[80]        | Adult            | Follow-up        | Outcome                 | Patient centered            | Patient and family needs and experiences during discharge; Adverse events, readmission, and mortality following discharge;                | (F) Family engagement/ support; Expectations;                                               | (F) Clinical judgement or decision making; | (F&B) Discharge location;                              | (None) |
| Lau (2018)[81]        | Adult            | Execution        | Process; Structure      | Efficient; Patient centered | Standardizing the discharge process; Timeliness of discharge (time of day, delay);                                                        | (None)                                                                                      | (F) Collaboration between ICU and ward;    | (F) Guidelines or policies; (B) Delay in discharge;    | (None) |
| Lau (2018)[82]        | Adult            | Follow-up        | Outcome                 | Safe                        | Adverse events, readmission, and mortality following discharge;                                                                           | (B) Patient demographic and clinical characteristics; ICU or hospital length of stay;       | (None)                                     | (B) Discharge location;                                | (None) |

*Patient Discharge from the ICU*

| Author (Year)       | Study Population | Phase(s) of Care    | Donabedian <sup>a</sup> | IoM <sup>b</sup>     | Themes                                                                                                                                                                                                    | Patient & Family Facilitators (F) & Barriers (B)                                          | Provider Facilitators (F) & Barriers (B)                                    | Organizational Facilitators (F) & Barriers (B)             | Tool             |
|---------------------|------------------|---------------------|-------------------------|----------------------|-----------------------------------------------------------------------------------------------------------------------------------------------------------------------------------------------------------|-------------------------------------------------------------------------------------------|-----------------------------------------------------------------------------|------------------------------------------------------------|------------------|
| Lau (2018)[83]      | Adult            | Follow-up           | Structure; Outcome      | Safe                 | Planning for discharge; Adverse events, readmission, and mortality following discharge; Evaluating patient readiness for discharge;                                                                       | (None)                                                                                    | (F) Critical care transition program;                                       | (F) Follow-up clinic or program; (F&B) Discharge location; | (None)           |
| Lee (2017)[84]      | Adult            | Planning            | Process                 | Patient centered     | Patient and family needs and experiences during discharge; Availability of complete and accurate discharge information; Discharge education for patients and families; Anxiety associated with discharge; | (F) Discharge education; Written communication; (B) Feelings of anxiety or embarrassment; | (None)                                                                      | (None)                                                     | Educational tool |
| Lekwijit (2020)[85] | Adult            | Planning; Follow-up | Outcome                 | Efficient            | Planning for discharge; Adverse events, readmission, and mortality following discharge; Continuity of patient care;                                                                                       | (B) Patient demographic and clinical characteristics;                                     | (None)                                                                      | (F) Use of best practices; Discharge location;             | (None)           |
| Lin (2017)[86]      | Adult            | Execution           | Process; Structure      | Effective; Efficient | Planning for discharge;                                                                                                                                                                                   | (F) Patient demographic and clinical characteristics;                                     | (F) Provider-provider communication; Clinical judgement or decision making; | (F) Education/training of providers;                       | (None)           |
| Lin (2019)[87]      | Adult            | Follow-up           | Outcome                 | Safe; Timely         | Adverse events, readmission, and mortality following discharge; Critical care transition program                                                                                                          | (None)                                                                                    | (None)                                                                      | (F) Tools to facilitate discharge;                         | (None)           |

*Patient Discharge from the ICU*

| Author (Year)         | Study Population | Phase(s) of Care                | Donabedian <sup>a</sup> | IoM <sup>b</sup>                  | Themes                                                                                                                                      | Patient & Family Facilitators (F) & Barriers (B)                                                                          | Provider Facilitators (F) & Barriers (B)                                                      | Organizational Facilitators (F) & Barriers (B)                                       | Tool          |
|-----------------------|------------------|---------------------------------|-------------------------|-----------------------------------|---------------------------------------------------------------------------------------------------------------------------------------------|---------------------------------------------------------------------------------------------------------------------------|-----------------------------------------------------------------------------------------------|--------------------------------------------------------------------------------------|---------------|
|                       |                  |                                 |                         |                                   | (nurse liaison, outreach team);                                                                                                             |                                                                                                                           |                                                                                               |                                                                                      |               |
| Major (2019)[88]      | Adult            | Follow-up                       | Process; Outcome        | Patient centered                  | Patient and family needs and experiences during discharge; Availability of complete and accurate discharge information;                     | (F) Family engagement/ support; (F&B) (Lack of) Provider-patient communication; (B) Feelings of anxiety or embarrassment; | (None)                                                                                        | (B) Discharge location;                                                              | (None)        |
| Martin (2020)[89]     | Adult            | Planning; Follow-up             | Process; Outcome        | Patient centered                  | Planning for discharge;                                                                                                                     | (B) Patient demographic and clinical characteristics;                                                                     | (None)                                                                                        | (F) Discharge location; Admission location before ICU; (B) Hospital or ICU capacity; | (None)        |
| Martin (2015)[90]     | Adult            | Execution; Follow-up            | Structure; Outcome      | Effective; Safe                   | Adverse events, readmission, and mortality following discharge; Critical care transition program (nurse liaison, outreach team);            | (None)                                                                                                                    | (F) Provider-provider communication; Critical care transition program; Written documentation; | (F) Tools to facilitate discharge; (F&B) Impact of current discharge practices;      | Transfer tool |
| McCairn (2014)[91]    | Adult            | Execution; Follow-up            | Process; Outcome        | Safe; Timely                      | Patient and family needs and experiences during discharge; Anxiety associated with discharge; Timeliness of discharge (time of day, delay); | (B) Feelings of anxiety or embarrassment;                                                                                 | (None)                                                                                        | (B) Time of discharge;                                                               | (None)        |
| McWilliams (2019)[92] | Adult            | Evaluation; Planning; Follow-up | Process; Outcome        | Effective; Safe; Patient centered | Planning for discharge; Adverse events, readmission, and mortality following discharge;                                                     | (F&B) Patient demographic and clinical characteristics;                                                                   | (F) Clinical judgement or decision making;                                                    | (F) Tools to facilitate discharge;                                                   | (None)        |

*Patient Discharge from the ICU*

| Author (Year)      | Study Population | Phase(s) of Care      | Donabedian <sup>a</sup> | IoM <sup>b</sup>       | Themes                                                                                                                                                                                                | Patient & Family Facilitators (F) & Barriers (B)                                                                                                  | Provider Facilitators (F) & Barriers (B)                               | Organizational Facilitators (F) & Barriers (B)            | Tool            |
|--------------------|------------------|-----------------------|-------------------------|------------------------|-------------------------------------------------------------------------------------------------------------------------------------------------------------------------------------------------------|---------------------------------------------------------------------------------------------------------------------------------------------------|------------------------------------------------------------------------|-----------------------------------------------------------|-----------------|
|                    |                  |                       |                         |                        | Evaluating patient readiness for discharge;                                                                                                                                                           |                                                                                                                                                   |                                                                        |                                                           |                 |
| Milton (2020)[93]  | Adult            | Execution; Follow-up  | Outcome                 | Patient centered       | Adverse events, readmission, and mortality following discharge; Evaluating patient readiness for discharge; Resource use during discharge;                                                            | (F&B) Patient demographic and clinical characteristics; Socioeconomic factors;                                                                    | (F) Clinical judgement or decision making;                             | (F) Use of best practices; Tools to facilitate discharge; | Prediction tool |
| Milton (2018)[94]  | Adult            | Evaluation; Follow-up | Outcome                 | Patient centered       | Adverse events, readmission, and mortality following discharge; Continuity of patient care;                                                                                                           | (B) Patient demographic and clinical characteristics; Feelings of anxiety or embarrassment; Physical and psychological effects of illness;        | (None)                                                                 | (F) Tools to facilitate discharge;                        | Triage model    |
| Mion (2020)[95]    | Adult            | Follow-up             | Process; Outcome        | Safe; Patient centered | Patient and family needs and experiences during discharge; Discharge education for patients and families; Adverse events, readmission, and mortality following discharge; Continuity of patient care; | (F) Provider-patient communication; Discharge education; (B) Feelings of anxiety or embarrassment; Physical and psychological effects of illness; | (F) Provider-provider communication; Critical care transition program; | (None)                                                    | (None)          |
| Moore (2013)[96]   | Adult            | Follow-up             | Outcome                 | Safe                   | Adverse events, readmission, and mortality following discharge; Timeliness of discharge (time of day, delay);                                                                                         | (B) Patient demographic and clinical characteristics;                                                                                             | (None)                                                                 | (F&B) Time of discharge;                                  | (None)          |
| Moreira (2017)[97] | Adult            | Execution             | Structure               | Safe; Timely           | Adverse events, readmission, and mortality following                                                                                                                                                  | (B) Patient demographic and                                                                                                                       | (None)                                                                 | (F&B) Time of discharge;                                  | (None)          |

*Patient Discharge from the ICU*

| Author (Year)        | Study Population | Phase(s) of Care     | Donabedian <sup>a</sup> | IoM <sup>b</sup> | Themes                                                                                                                           | Patient & Family Facilitators (F) & Barriers (B)      | Provider Facilitators (F) & Barriers (B)                                                        | Organizational Facilitators (F) & Barriers (B)          | Tool                 |
|----------------------|------------------|----------------------|-------------------------|------------------|----------------------------------------------------------------------------------------------------------------------------------|-------------------------------------------------------|-------------------------------------------------------------------------------------------------|---------------------------------------------------------|----------------------|
|                      |                  |                      |                         |                  | discharge; Timeliness of discharge (time of day, delay);                                                                         | clinical characteristics;                             |                                                                                                 |                                                         |                      |
| Morris (2016)[98]    | Adult            | Execution            | Process                 | Timely           | Adverse events, readmission, and mortality following discharge; Timeliness of discharge (time of day, delay);                    | (None)                                                | (None)                                                                                          | (B) Limited ICU and ward resources; Delay in discharge; | (None)               |
| Morton B. (2020)[99] | Adult            | Follow-up            | Outcome                 | Safe             | Planning for discharge; Adverse events, readmission, and mortality following discharge;                                          | (B) Patient demographic and clinical characteristics; | (None)                                                                                          | (F) Tools to facilitate discharge;                      | (None)               |
| Murray (2020)[100]   | Adult            | Evaluation; Planning | Process; Outcome        | Efficient; Safe  | Planning for discharge; Evaluating patient readiness for discharge; Resource use during discharge;                               | (B) ICU or hospital length of stay;                   | (F) Provider-provider communication; Collaboration between ICU and ward; Written documentation; | (F) Tools to facilitate discharge;                      | Guideline/ checklist |
| Ng (2018)[101]       | Adult            | Follow-up            | Outcome                 | Safe; Timely     | Adverse events, readmission, and mortality following discharge; Timeliness of discharge (time of day, delay);                    | (B) Patient demographic and clinical characteristics; | (None)                                                                                          | (B) Admission location before ICU;                      | (None)               |
| Niven (2014)[102]    | Adult            | Follow-up            | Outcome                 | Safe             | Adverse events, readmission, and mortality following discharge; Critical care transition program (nurse liaison, outreach team); | (None)                                                | (F) Critical care transition program;                                                           | (None)                                                  | (None)               |
| Ofoma (2014)[103]    | Adult            | Execution            | Outcome                 | Efficient; Safe  | Adverse events, readmission, and mortality following discharge; Resource use during discharge;                                   | (B) Lack of provider-patient communication;           | (None)                                                                                          | (B) Impact of current discharge practices;              | (None)               |

*Patient Discharge from the ICU*

| Author (Year)          | Study Population | Phase(s) of Care     | Donabedian <sup>a</sup> | IoM <sup>b</sup>     | Themes                                                                                                                           | Patient & Family Facilitators (F) & Barriers (B)                                                                       | Provider Facilitators (F) & Barriers (B)                                                    | Organizational Facilitators (F) & Barriers (B)                                                                           | Tool   |
|------------------------|------------------|----------------------|-------------------------|----------------------|----------------------------------------------------------------------------------------------------------------------------------|------------------------------------------------------------------------------------------------------------------------|---------------------------------------------------------------------------------------------|--------------------------------------------------------------------------------------------------------------------------|--------|
| Ofoma (2018)[104]      | Adult            | Execution            | Process; Structure      | Effective; Efficient | Evaluating patient readiness for discharge; Resource use during discharge; Continuity of patient care;                           | (B) Patient demographic and clinical characteristics; Lack of provider-patient communication;                          | (F) Clinical judgement or decision making; (F&B) (Lack of) Provider-provider communication; | (B) Limited ICU and ward resources; Impact of current discharge practices; Discharge location; Hospital characteristics; | (None) |
| Ofoma (2020)[105]      | Adult            | Execution; Follow-up | Process; Outcome        | Efficient; Timely    | Adverse events, readmission, and mortality following discharge; Timeliness of discharge (time of day, delay);                    | (None)                                                                                                                 | (None)                                                                                      | (B) Impact of current discharge practices; Costs of healthcare provided; Delay in discharge;                             | (None) |
| Oh (2015)[106]         | Adult            | Execution            | Process                 | Patient centered     | Patient and family needs and experiences during discharge; Anxiety associated with discharge;                                    | (F) Family engagement/ support; (B) Feelings of anxiety or embarrassment;                                              | (None)                                                                                      | (None)                                                                                                                   | (None) |
| Ostergaard (2019)[107] | Adult            | Execution            | Process                 | Effective            | Availability of complete and accurate discharge information; Standardizing the discharge process; Resource use during discharge; | (None)                                                                                                                 | (B) Workload;                                                                               | (F) Tools to facilitate discharge; (B) Limited ICU and ward resources;                                                   | (None) |
| Oud & Chan (2018)[108] | Adult            | Execution            | Structure               | Safe                 | Standardizing the discharge process;                                                                                             | (F&B) Patient demographic and clinical characteristics; (B) Feelings of anxiety or embarrassment; Logistical barriers; | (None)                                                                                      | (B) Impact of current discharge practices; Discharge location;                                                           | (None) |

*Patient Discharge from the ICU*

| Author (Year)          | Study Population | Phase(s) of Care               | Donabedian <sup>a</sup> | IoM <sup>b</sup>                  | Themes                                                                                                                                | Patient & Family Facilitators (F) & Barriers (B)                                         | Provider Facilitators (F) & Barriers (B)                                                        | Organizational Facilitators (F) & Barriers (B)                                                                    | Tool   |
|------------------------|------------------|--------------------------------|-------------------------|-----------------------------------|---------------------------------------------------------------------------------------------------------------------------------------|------------------------------------------------------------------------------------------|-------------------------------------------------------------------------------------------------|-------------------------------------------------------------------------------------------------------------------|--------|
|                        |                  |                                |                         |                                   |                                                                                                                                       |                                                                                          |                                                                                                 | Hospital characteristics;                                                                                         |        |
| Parentmark (2019)[109] | Adult            | Execution                      | Process; Outcome        | Safe                              | Adverse events, readmission, and mortality following discharge; Timeliness of discharge (time of day, delay);                         | (None)                                                                                   | (None)                                                                                          | (F&B) Time of discharge;                                                                                          | (None) |
| Patel (2020)[110]      | Adult            | Planning; Execution; Follow-up | Process; Outcome        | Efficient; Safe; Patient centered | Planning for discharge; Adverse events, readmission, and mortality following discharge; Timeliness of discharge (time of day, delay); | (None)                                                                                   | (F) Provider-provider communication; Collaboration between ICU and ward; (B) Workload;          | (F) Discharge location; (B) Delay in discharge;                                                                   | (None) |
| Pattison (2015)[111]   | Adult            | Follow-up                      | Outcome                 | Effective; Patient centered       | Anxiety associated with discharge;                                                                                                    | (B) Feelings of anxiety or embarrassment; Physical and psychological effects of illness; | (None)                                                                                          | (None)                                                                                                            | (None) |
| Peltonen (2015)[112]   | Adult            | Execution                      | Process; Structure      | Efficient; Timely                 | Timeliness of discharge (time of day, delay); Resource use during discharge;                                                          | (None)                                                                                   | (B) Workload; Lack of provider-provider communication;                                          | (B) Limited ICU and ward resources; Time of discharge; Impact of current discharge practices; Discharge location; | (None) |
| Peters (2017)[113]     | Adult            | Execution                      | Process; Structure      | Effective; Efficient              | Patient and family needs and experiences during discharge; Continuity of patient care; Medication reconciliation;                     | (F) Provider-patient communication;                                                      | (F) Provider-provider communication; Collaboration between ICU and ward; Written documentation; | (F) Guidelines or policies;                                                                                       | (None) |



*Patient Discharge from the ICU*

| Author (Year)      | Study Population | Phase(s) of Care | Donabedian <sup>a</sup> | IoM <sup>b</sup>       | Themes                                                                                                                                                        | Patient & Family Facilitators (F) & Barriers (B)                                                                                                          | Provider Facilitators (F) & Barriers (B)                                                                                                        | Organizational Facilitators (F) & Barriers (B)                                                                                                                            | Tool                 |
|--------------------|------------------|------------------|-------------------------|------------------------|---------------------------------------------------------------------------------------------------------------------------------------------------------------|-----------------------------------------------------------------------------------------------------------------------------------------------------------|-------------------------------------------------------------------------------------------------------------------------------------------------|---------------------------------------------------------------------------------------------------------------------------------------------------------------------------|----------------------|
| Powell (2020)[114] | Adult            | Execution        | Process                 | Effective; Safe        | Availability of complete and accurate discharge information; Standardizing the discharge process; Resource use during discharge; Continuity of patient care;  | (None)                                                                                                                                                    | (F) Provider-provider communication; Collaboration between ICU and ward; Knowledge/experience of provider; Written documentation; (B) Workload; | (F) Guidelines or policies; Tools to facilitate discharge; (F&B) Impact of current discharge practices; (B) Delay in discharge; Hospital characteristics; Infrastructure; | Guideline/ checklist |
| Rai (2019)[115]    | Adult            | Follow-up        | Outcome                 | Safe; Patient centered | Anxiety associated with discharge; Discharge education for providers;                                                                                         | (B) Patient demographic and clinical characteristics; Physical and psychological effects of illness;                                                      | (F) Collaboration between ICU and ward; Knowledge/experience of provider;                                                                       | (F) Education/training of providers; (B) Limited ICU and ward resources; Discharge location;                                                                              | (None)               |
| Ramos (2014)[116]  | Adult            | Execution        | Process; Outcome        | Effective; Safe        | Medication reconciliation;                                                                                                                                    | (None)                                                                                                                                                    | (None)                                                                                                                                          | (F) Use of best practices; (F&B) Impact of current discharge practices;                                                                                                   | (None)               |
| Ramsay (2013)[117] | Adult            | Follow-up        | Process                 | Patient centered       | Patient and family needs and experiences during discharge; Availability of complete and accurate discharge information; Continuity of patient care; Autonomy; | (F) Provider-patient communication; Self-efficacy; (B) Feelings of anxiety or embarrassment; Expectations; Physical and psychological effects of illness; | (B) Workload;                                                                                                                                   | (F) Follow-up clinic or program;                                                                                                                                          | (None)               |
| Ramsay (2016)[118] | Adult            | Execution        | Process                 | Effective              | Patient and family needs and                                                                                                                                  | (F) Provider-patient                                                                                                                                      | (None)                                                                                                                                          | (None)                                                                                                                                                                    | (None)               |

*Patient Discharge from the ICU*

| Author (Year)       | Study Population | Phase(s) of Care     | Donabedian <sup>a</sup> | IoM <sup>b</sup> | Themes                                                                                                                                                                                                                        | Patient & Family Facilitators (F) & Barriers (B)                                                                                                                                                                                                                                                  | Provider Facilitators (F) & Barriers (B) | Organizational Facilitators (F) & Barriers (B)                                                                        | Tool   |
|---------------------|------------------|----------------------|-------------------------|------------------|-------------------------------------------------------------------------------------------------------------------------------------------------------------------------------------------------------------------------------|---------------------------------------------------------------------------------------------------------------------------------------------------------------------------------------------------------------------------------------------------------------------------------------------------|------------------------------------------|-----------------------------------------------------------------------------------------------------------------------|--------|
|                     |                  |                      |                         |                  | experiences during discharge; Continuity of patient care;                                                                                                                                                                     | communication; Family engagement/support; Written communication;                                                                                                                                                                                                                                  |                                          |                                                                                                                       |        |
| Ranzani (2014)[119] | Adult            | Follow-up            | Outcome                 | Safe             | Adverse events, readmission, and mortality following discharge; Evaluating patient readiness for discharge;                                                                                                                   | (F&B) Patient demographic and clinical characteristics;                                                                                                                                                                                                                                           | (None)                                   | (F) Discharge location; Admission location before ICU;                                                                | (None) |
| Rath (2020)[120]    | Adult            | Execution; Follow-up | Process; Outcome        | Patient centered | Patient and family needs and experiences during discharge; Availability of complete and accurate discharge information; Discharge education for patients and families; Continuity of patient care; Medication reconciliation; | (F) Provider-patient communication; Discharge education; Family engagement/support; (B) Patient demographic and clinical characteristics; Feelings of anxiety or embarrassment; Expectations; Physical and psychological effects of illness; ICU or hospital length of stay; Financial obstacles; | (None)                                   | (F&B) Discharge location; (B) Time of discharge; Impact of current discharge practices; Costs of healthcare provided; | (None) |
| Reineck (2015)[121] | Adult            | Follow-up            | Outcome                 | Efficient; Safe  | Adverse events, readmission, and mortality following discharge;                                                                                                                                                               | (None)                                                                                                                                                                                                                                                                                            | (None)                                   | (F) Impact of current discharge practices; Hospital characteristics;                                                  | (None) |
| Rice (2020)[122]    | Adult            | Execution            | Process; Outcome        | Safe; Timely     | Availability of complete and                                                                                                                                                                                                  | (None)                                                                                                                                                                                                                                                                                            | (F&B) (Lack of) Provider-                | (F) Education/training of                                                                                             | (None) |

*Patient Discharge from the ICU*

| Author (Year)          | Study Population | Phase(s) of Care                 | Donabedian <sup>a</sup> | IoM <sup>b</sup>        | Themes                                                                                                                                                                                             | Patient & Family Facilitators (F) & Barriers (B)        | Provider Facilitators (F) & Barriers (B)                       | Organizational Facilitators (F) & Barriers (B)                             | Tool   |
|------------------------|------------------|----------------------------------|-------------------------|-------------------------|----------------------------------------------------------------------------------------------------------------------------------------------------------------------------------------------------|---------------------------------------------------------|----------------------------------------------------------------|----------------------------------------------------------------------------|--------|
|                        |                  |                                  |                         |                         | accurate discharge information; Standardizing the discharge process; Adverse events, readmission, and mortality following discharge; Discharge education for providers; Medication reconciliation; |                                                         | provider communication;                                        | providers; (B) Costs of healthcare provided;                               |        |
| Rizvi (2019)[123]      | Adult            | Follow-up                        | Outcome                 | Safe; Patient centered  | Medication reconciliation;                                                                                                                                                                         | (None)                                                  | (F) Clinical judgement or decision making;                     | (None)                                                                     | (None) |
| Rojas (2018)[124]      | Adult            | Evaluation; Follow-up            | Outcome                 | Safe                    | Adverse events, readmission, and mortality following discharge;                                                                                                                                    | (F&B) Patient demographic and clinical characteristics; | (None)                                                         | (B) Impact of current discharge practices;                                 | (None) |
| Safavi (2019)[125]     | Adult            | Execution                        | Process                 | Timely                  | Availability of complete and accurate discharge information; Timeliness of discharge (time of day, delay);                                                                                         | (None)                                                  | (F) Clinical judgement or decision making;                     | (F&B) Impact of current discharge practices; (B) Delay in discharge;       | (None) |
| Sanson (2020)[126]     | Adult            | Evaluation; Execution; Follow-up | Process; Outcome        | Safe                    | Adverse events, readmission, and mortality following discharge; Evaluating patient readiness for discharge; Continuity of patient care;                                                            | (B) Patient demographic and clinical characteristics;   | (F) Collaboration between ICU and ward; Written documentation; | (B) Limited ICU and ward resources; Impact of current discharge practices; | (None) |
| Santamaria (2015)[127] | Adult            | Execution                        | Structure; Outcome      | Effective; Safe; Timely | Planning for discharge; Adverse events, readmission, and mortality following discharge; Timeliness of                                                                                              | (B) Patient demographic and clinical characteristics;   | (None)                                                         | (F&B) Time of discharge;                                                   | (None) |

*Patient Discharge from the ICU*

| Author (Year)        | Study Population | Phase(s) of Care     | Donabedian <sup>a</sup> | IoM <sup>b</sup>            | Themes                                                                                                                                                                                                                                                                                  | Patient & Family Facilitators (F) & Barriers (B)                                                                                                                         | Provider Facilitators (F) & Barriers (B)                                                                                                                         | Organizational Facilitators (F) & Barriers (B)                                                                                                           | Tool   |
|----------------------|------------------|----------------------|-------------------------|-----------------------------|-----------------------------------------------------------------------------------------------------------------------------------------------------------------------------------------------------------------------------------------------------------------------------------------|--------------------------------------------------------------------------------------------------------------------------------------------------------------------------|------------------------------------------------------------------------------------------------------------------------------------------------------------------|----------------------------------------------------------------------------------------------------------------------------------------------------------|--------|
|                      |                  |                      |                         |                             | discharge (time of day, delay);                                                                                                                                                                                                                                                         |                                                                                                                                                                          |                                                                                                                                                                  |                                                                                                                                                          |        |
| Santhosh (2019)[128] | Adult            | Execution            | Process; Outcome        | Effective; Efficient; Safe  | Patient and family needs and experiences during discharge; Availability of complete and accurate discharge information; Standardizing the discharge process; Adverse events, readmission, and mortality following discharge; Resource use during discharge; Continuity of patient care; | (F) Written communication;                                                                                                                                               | (F) Collaboration between ICU and ward; Knowledge/ experience of provider; Written documentation; (F&B) (Lack of) Provider-provider communication; (B) Workload; | (F) Guidelines or policies; Education/ training of providers; (F&B) Impact of current discharge practices; (B) Limited ICU and ward resources; Staffing; | (None) |
| Sauro (2020)[129]    | Adult            | Execution; Follow-up | Process; Outcome        | Safe                        | Adverse events, readmission, and mortality following discharge; Continuity of patient care;                                                                                                                                                                                             | (None)                                                                                                                                                                   | (F) Provider-provider communication; (B) Lack of knowledge/ experience of provider;                                                                              | (B) Impact of current discharge practices; Hospital or ICU capacity;                                                                                     | (None) |
| Sayde (2020)[130]    | Adult            | Execution; Follow-up | Process; Outcome        | Effective; Patient centered | Patient and family needs and experiences during discharge; Availability of complete and accurate discharge information; Adverse events, readmission, and mortality following discharge; Anxiety associated with discharge;                                                              | (F) Provider-patient communication; Family engagement/ support; (B) Patient demographic and clinical characteristics; Feelings of anxiety or embarrassment; Physical and | (None)                                                                                                                                                           | (F) Education/ training of providers; Use of best practices;                                                                                             | (None) |

| Author (Year)               | Study Population | Phase(s) of Care                | Donabedian <sup>a</sup>     | IoM <sup>b</sup>                       | Themes                                                                                                                                                                                                      | Patient & Family Facilitators (F) & Barriers (B)                                                                                                                               | Provider Facilitators (F) & Barriers (B)                                           | Organizational Facilitators (F) & Barriers (B)                                                                                          | Tool   |
|-----------------------------|------------------|---------------------------------|-----------------------------|----------------------------------------|-------------------------------------------------------------------------------------------------------------------------------------------------------------------------------------------------------------|--------------------------------------------------------------------------------------------------------------------------------------------------------------------------------|------------------------------------------------------------------------------------|-----------------------------------------------------------------------------------------------------------------------------------------|--------|
|                             |                  |                                 |                             |                                        |                                                                                                                                                                                                             | psychological effects of illness;                                                                                                                                              |                                                                                    |                                                                                                                                         |        |
| Sevin (2018)[131]           | Adult            | Follow-up                       | Process; Structure; Outcome | Effective; Patient centered            | Discharge education for patients and families; Adverse events, readmission, and mortality following discharge; Critical care transition program (nurse liaison, outreach team); Continuity of patient care; | (F) Discharge education; (F&B) Patient demographic and clinical characteristics; (B) Physical and psychological effects of illness;                                            | (F) Critical care transition program;                                              | (None)                                                                                                                                  | (None) |
| Sevin & Jackson (2019)[132] | Adult            | Follow-up                       | Structure                   | Effective; Efficient; Patient centered | Adverse events, readmission, and mortality following discharge; Continuity of patient care; Discharge education for providers;                                                                              | (F) Provider-patient communication; (B) Patient demographic and clinical characteristics; Feelings of anxiety or embarrassment; Physical and psychological effects of illness; | (F) Knowledge/experience of provider; (B) Lack of provider-provider communication; | (F) Follow-up clinic or program; (F&B) (Lack of) Education/training of providers; (B) Costs of healthcare provided; Discharge location; | (None) |
| Shimogai (2019)[133]        | Adult            | Evaluation; Planning; Follow-up | Process; Outcome            | Effective; Safe; Patient centered      | Planning for discharge; Evaluating patient readiness for discharge; Autonomy;                                                                                                                               | (F&B) Patient demographic and clinical characteristics; (B) Physical and psychological effects of illness;                                                                     | (None)                                                                             | (F) Follow-up clinic or program;                                                                                                        | (None) |
| Siddiqui (2013)[134]        | Adult            | Follow-up                       | Outcome                     | Safe                                   | Adverse events, readmission, and mortality following discharge;                                                                                                                                             | (B) Patient demographic and clinical characteristics;                                                                                                                          | (None)                                                                             | (None)                                                                                                                                  | (None) |
| Sirvent (2016)[135]         | Adult            | Planning; Execution             | Process                     | Efficient; Timely                      | Standardizing the discharge process; Timeliness of                                                                                                                                                          | (None)                                                                                                                                                                         | (None)                                                                             | (F) Time of discharge; Discharge                                                                                                        | (None) |

*Patient Discharge from the ICU*

| Author (Year)       | Study Population | Phase(s) of Care      | Donabedian <sup>a</sup> | IoM <sup>b</sup>             | Themes                                                                                                                                                                                                                                 | Patient & Family Facilitators (F) & Barriers (B)                                                                   | Provider Facilitators (F) & Barriers (B)                                                        | Organizational Facilitators (F) & Barriers (B)                                               | Tool            |
|---------------------|------------------|-----------------------|-------------------------|------------------------------|----------------------------------------------------------------------------------------------------------------------------------------------------------------------------------------------------------------------------------------|--------------------------------------------------------------------------------------------------------------------|-------------------------------------------------------------------------------------------------|----------------------------------------------------------------------------------------------|-----------------|
|                     |                  |                       |                         |                              | discharge (time of day, delay); Resource use during discharge;                                                                                                                                                                         |                                                                                                                    |                                                                                                 | location; Hospital characteristics;                                                          |                 |
| Smith (2018)[136]   | Adult            | Execution             | Outcome                 | Patient centered             | Patient and family needs and experiences during discharge; Continuity of patient care;                                                                                                                                                 | (F) Family engagement/ support; Expectations;                                                                      | (None)                                                                                          | (F) Discharge location;                                                                      | (None)          |
| Stelfox (2016)[137] | Adult            | Follow-up             | Outcome                 | Efficient; Safe              | Adverse events, readmission, and mortality following discharge; Critical care transition program (nurse liaison, outreach team);                                                                                                       | (B) Patient demographic and clinical characteristics;                                                              | (F) Critical care transition program; Multidisciplinary team;                                   | (B) Impact of current discharge practices;                                                   | (None)          |
| Stelfox (2017)[138] | Adult            | Planning; Execution   | Process; Structure      | Effective; Efficient; Timely | Patient and family needs and experiences during discharge; Availability of complete and accurate discharge information; Standardizing the discharge process; Timeliness of discharge (time of day, delay); Continuity of patient care; | (F) Provider-patient communication; Written communication; Patient/ family treated as a member of healthcare team; | (F) Provider-provider communication; Collaboration between ICU and ward; Written documentation; | (B) Impact of current discharge practices; Costs of healthcare provided; Delay in discharge; | (None)          |
| Stelfox (2018)[139] | Adult            | Evaluation; Follow-up | Outcome                 | Efficient; Safe; Timely      | Adverse events, readmission, and mortality following discharge;                                                                                                                                                                        | (F) Patient demographic and clinical characteristics;                                                              | (None)                                                                                          | (F&B) Admission location before ICU; Discharge location;                                     | (None)          |
| Szubski (2014)[140] | Adult            | Evaluation            | Process                 | Efficient; Patient centered  | Planning for discharge;                                                                                                                                                                                                                | (F&B) Patient demographic and clinical characteristics;                                                            | (F) Clinical judgement or decision making;                                                      | (F) Discharge location;                                                                      | Prediction tool |

*Patient Discharge from the ICU*

| Author (Year)            | Study Population | Phase(s) of Care      | Donabedian <sup>a</sup> | IoM <sup>b</sup>                  | Themes                                                                                                                                                                                                                                                                     | Patient & Family Facilitators (F) & Barriers (B)                                                                                                                                                     | Provider Facilitators (F) & Barriers (B)                                                                                 | Organizational Facilitators (F) & Barriers (B)                                                                  | Tool   |
|--------------------------|------------------|-----------------------|-------------------------|-----------------------------------|----------------------------------------------------------------------------------------------------------------------------------------------------------------------------------------------------------------------------------------------------------------------------|------------------------------------------------------------------------------------------------------------------------------------------------------------------------------------------------------|--------------------------------------------------------------------------------------------------------------------------|-----------------------------------------------------------------------------------------------------------------|--------|
| Taniguchi (2019)[141]    | Adult            | Evaluation; Follow-up | Process; Outcome        | Effective; Safe                   | Adverse events, readmission, and mortality following discharge; Evaluating patient readiness for discharge;                                                                                                                                                                | (B) Patient demographic and clinical characteristics;                                                                                                                                                | (F) Clinical judgement or decision making;                                                                               | (F) Education/ training of providers; Tools to facilitate discharge; (B) Impact of current discharge practices; | (None) |
| Tully (2019)[142]        | Adult            | Execution             | Process; Outcome        | Safe; Patient centered            | Availability of complete and accurate discharge information; Adverse events, readmission, and mortality following discharge; Medication reconciliation;                                                                                                                    | (None)                                                                                                                                                                                               | (F) Provider-provider communication;                                                                                     | (F) Use of best practices;                                                                                      | (None) |
| Uppanisakorn (2018)[143] | Adult            | Follow-up             | Outcome                 | Safe                              | Adverse events, readmission, and mortality following discharge;                                                                                                                                                                                                            | (B) Patient demographic and clinical characteristics;                                                                                                                                                | (None)                                                                                                                   | (None)                                                                                                          | (None) |
| van Mol (2017)[144]      | Adult            | Planning; Execution   | Process                 | Effective; Safe; Patient centered | Patient and family needs and experiences during discharge; Discharge education for patients and families; Planning for discharge; Standardizing the discharge process; Anxiety associated with discharge; Critical care transition program (nurse liaison, outreach team); | (F) Provider-patient communication; Discharge education; Family engagement/ support; Written communication; (B) Feelings of anxiety or embarrassment; Physical and psychological effects of illness; | (F) Provider-provider communication; Critical care transition program; Collaboration between ICU and ward; (B) Workload; | (B) Limited ICU and ward resources;                                                                             | (None) |

*Patient Discharge from the ICU*

| Author (Year)             | Study Population | Phase(s) of Care     | Donabedian <sup>a</sup> | IoM <sup>b</sup>       | Themes                                                                                                                                                         | Patient & Family Facilitators (F) & Barriers (B)         | Provider Facilitators (F) & Barriers (B)       | Organizational Facilitators (F) & Barriers (B)                                                                                            | Tool   |
|---------------------------|------------------|----------------------|-------------------------|------------------------|----------------------------------------------------------------------------------------------------------------------------------------------------------------|----------------------------------------------------------|------------------------------------------------|-------------------------------------------------------------------------------------------------------------------------------------------|--------|
| van Mol (2018)[145]       | Adult            | Follow-up            | Structure; Outcome      | Safe; Patient centered | Patient and family needs and experiences during discharge; Critical care transition program (nurse liaison, outreach team); Discharge education for providers; | (F) Provider-patient communication; Discharge education; | (F) Critical care transition program;          | (F) Guidelines or policies;                                                                                                               | (None) |
| van Sluisveld (2017)[146] | Adult            | Execution; Follow-up | Process; Outcome        | Safe                   | Standardizing the discharge process; Adverse events, readmission, and mortality following discharge;                                                           | (None)                                                   | (F) Provider-provider communication;           | (F) Use of best practices;                                                                                                                | (None) |
| Vollam (2018)[147]        | Adult            | Execution; Follow-up | Structure; Outcome      | Safe                   | Adverse events, readmission, and mortality following discharge; Timeliness of discharge (time of day, delay);                                                  | (None)                                                   | (None)                                         | (F&B) Time of discharge;                                                                                                                  | (None) |
| Vollam (2020)[148]        | Adult            | Follow-up            | Outcome                 | Effective; Safe        | Adverse events, readmission, and mortality following discharge;                                                                                                | (None)                                                   | (None)                                         | (F) Use of best practices; Discharge location;                                                                                            | (None) |
| Wagner (2013)[149]        | Adult            | Execution; Follow-up | Structure; Outcome      | Safe; Timely           | Adverse events, readmission, and mortality following discharge; Timeliness of discharge (time of day, delay); Resource use during discharge;                   | (F&B) Patient demographic and clinical characteristics;  | (None)                                         | (F&B) Impact of current discharge practices; Admission location before ICU; (B) Limited ICU and ward resources; Hospital or ICU capacity; | (None) |
| White (2019)[150]         | Adult            | Planning; Execution  | Process; Structure      | Safe; Patient centered | Patient and family needs and experiences during                                                                                                                | (F) Provider-patient communication;                      | (F) Knowledge/experience of provider; Clinical | (F) Impact of current                                                                                                                     | (None) |



*Patient Discharge from the ICU*

| Author (Year)            | Study Population | Phase(s) of Care                | Donabedian <sup>a</sup> | IoM <sup>b</sup> | Themes                                                                                                                                                                                          | Patient & Family Facilitators (F) & Barriers (B)                                                                            | Provider Facilitators (F) & Barriers (B)              | Organizational Facilitators (F) & Barriers (B) | Tool                 |
|--------------------------|------------------|---------------------------------|-------------------------|------------------|-------------------------------------------------------------------------------------------------------------------------------------------------------------------------------------------------|-----------------------------------------------------------------------------------------------------------------------------|-------------------------------------------------------|------------------------------------------------|----------------------|
|                          |                  |                                 |                         |                  | discharge; Planning for discharge;                                                                                                                                                              | (F&B) Expectations;                                                                                                         | judgement or decision making; Multidisciplinary team; | discharge practices;                           |                      |
| Won and Son (2020) [151] | Adult            | Follow-up                       | Outcome                 | Patient centered | Patient and family needs and experiences during discharge; Anxiety associated with discharge;                                                                                                   | (F) Expectations; (B) Feelings of anxiety or embarrassment;                                                                 | (None)                                                | (None)                                         | (None)               |
| Wood (2014)[152]         | Adult            | Execution                       | Structure               | Timely           | Timeliness of discharge (time of day, delay);                                                                                                                                                   | (None)                                                                                                                      | (None)                                                | (F) Time of discharge;                         | (None)               |
| Xing (2019)[153]         | Adult            | Follow-up                       | Process; Outcome        | Efficient; Safe  | Adverse events, readmission, and mortality following discharge; Timeliness of discharge (time of day, delay);                                                                                   | (F&B) Patient demographic and clinical characteristics;                                                                     | (None)                                                | (F) Discharge location;                        | (None)               |
| Yang (2016)[154]         | Adult            | Execution; Follow-up            | Outcome                 | Safe; Timely     | Adverse events, readmission, and mortality following discharge; Timeliness of discharge (time of day, delay);                                                                                   | (None)                                                                                                                      | (None)                                                | (B) Time of discharge; Delay in discharge;     | (None)               |
| Yun (2017)[155]          | Adult            | Evaluation; Planning; Execution | Process; Structure      | Effective        | Patient and family needs and experiences during discharge; Planning for discharge; Critical care transition program (nurse liaison, outreach team); Evaluating patient readiness for discharge; | (F) Patient demographic and clinical characteristics; Family engagement/ support; (B) Feelings of anxiety or embarrassment; | (F) Critical care transition program;                 | (None)                                         | Guideline/ checklist |
| Zaidi (2019)[156]        | Adult            | Evaluation; Follow-up           | Outcome                 | Safe             | Standardizing the discharge process; Evaluating patient                                                                                                                                         | (F) Patient demographic and                                                                                                 | (None)                                                | (F) Discharge location;                        | (None)               |

*Patient Discharge from the ICU*

| Author (Year)                 | Study Population | Phase(s) of Care               | Donabedian <sup>a</sup> | IoM <sup>b</sup>                       | Themes                                                                                                                                                                                                                                                                                 | Patient & Family Facilitators (F) & Barriers (B)      | Provider Facilitators (F) & Barriers (B)                                                                                              | Organizational Facilitators (F) & Barriers (B)                           | Tool   |
|-------------------------------|------------------|--------------------------------|-------------------------|----------------------------------------|----------------------------------------------------------------------------------------------------------------------------------------------------------------------------------------------------------------------------------------------------------------------------------------|-------------------------------------------------------|---------------------------------------------------------------------------------------------------------------------------------------|--------------------------------------------------------------------------|--------|
|                               |                  |                                |                         |                                        | readiness for discharge;                                                                                                                                                                                                                                                               | clinical characteristics;                             |                                                                                                                                       |                                                                          |        |
| Zilahi & O'Connor (2019)[157] | Adult            | Execution; Follow-up           | Process                 | Effective; Patient centered            | Continuity of patient care;                                                                                                                                                                                                                                                            | (B) Feelings of anxiety or embarrassment;             | (F) Written documentation; Clear roles and responsibilities; Multidisciplinary team; (F&B) (Lack of) Provider-provider communication; | (F) Hospital characteristics; (B) Impact of current discharge practices; | (None) |
| Tiruvoipati (2017)[158]       | Adult; Pediatric | Execution                      | Structure               | Timely                                 | Timeliness of discharge (time of day, delay);                                                                                                                                                                                                                                          | (B) Patient demographic and clinical characteristics; | (None)                                                                                                                                | (B) Time of discharge; Impact of current discharge practices;            | (None) |
| van Sluisveld (2015)[159]     | Adult; Pediatric | Planning; Execution; Follow-up | Process; Outcome        | Effective; Efficient; Safe; Timely     | Availability of complete and accurate discharge information; Planning for discharge; Standardizing the discharge process; Adverse events, readmission, and mortality following discharge; Critical care transition program (nurse liaison, outreach team); Continuity of patient care; | (None)                                                | (F) Critical care transition program; Written documentation; (B) Lack of provider-provider communication;                             | (F) Tools to facilitate discharge;                                       | (None) |
| van Sluisveld (2017)[160]     | Adult; Pediatric | Planning; Execution            | Process; Structure      | Effective; Efficient; Patient centered | Patient and family needs and experiences during discharge; Availability of complete and                                                                                                                                                                                                | (F) Provider-patient communication;                   | (F) Provider-provider communication; Collaboration between ICU and                                                                    | (F) Guidelines or policies; Tools to facilitate discharge; (B)           | (None) |

| Author (Year)      | Study Population           | Phase(s) of Care               | Donabedian <sup>a</sup> | IoM <sup>b</sup>                                      | Themes                                                                                                                                                                                                                                                                                                                                                                                                                                                          | Patient & Family Facilitators (F) & Barriers (B)                                                                                                              | Provider Facilitators (F) & Barriers (B)                                                                                                                                             | Organizational Facilitators (F) & Barriers (B)                                                                                                                                           | Tool   |
|--------------------|----------------------------|--------------------------------|-------------------------|-------------------------------------------------------|-----------------------------------------------------------------------------------------------------------------------------------------------------------------------------------------------------------------------------------------------------------------------------------------------------------------------------------------------------------------------------------------------------------------------------------------------------------------|---------------------------------------------------------------------------------------------------------------------------------------------------------------|--------------------------------------------------------------------------------------------------------------------------------------------------------------------------------------|------------------------------------------------------------------------------------------------------------------------------------------------------------------------------------------|--------|
|                    |                            |                                |                         |                                                       | accurate discharge information; Planning for discharge; Standardizing the discharge process; Resource use during discharge; Medication reconciliation;                                                                                                                                                                                                                                                                                                          |                                                                                                                                                               | ward; Written documentation; (B) Workload; Lack of knowledge/ experience of provider;                                                                                                | Limited ICU and ward resources; Impact of current discharge practices; Costs of healthcare provided; Hospital characteristics; Infrastructure; Lack of education/ training of providers; |        |
| Herbst (2018)[161] | Adult; Pediatric; Neonatal | Planning; Execution; Follow-up | Process; Structure      | Effective; Efficient; Safe; Patient centered ; Timely | Patient and family needs and experiences during discharge; Discharge education for patients and families; Standardizing the discharge process; Adverse events, readmission, and mortality following discharge; Timeliness of discharge (time of day, delay); Critical care transition program (nurse liaison, outreach team); Evaluating patient readiness for discharge; Resource use during discharge; Continuity of patient care; Medication reconciliation; | (F) Patient demographic and clinical characteristics; Provider-patient communication; Discharge education; Family engagement/ support; Written communication; | (F) Provider-provider communication; Critical care transition program; Collaboration between ICU and ward; Knowledge/ experience of provider; Clinical judgement or decision making; | (F) Guidelines or policies; Use of best practices; Tools to facilitate discharge; (B) Delay in discharge; Discharge location;                                                            | (None) |

*Patient Discharge from the ICU*

| Author (Year)               | Study Population           | Phase(s) of Care                | Donabedian <sup>a</sup>     | IoM <sup>b</sup>            | Themes                                                                                                                                                                    | Patient & Family Facilitators (F) & Barriers (B)                                                                | Provider Facilitators (F) & Barriers (B)                                                        | Organizational Facilitators (F) & Barriers (B)                                                                                                                   | Tool             |
|-----------------------------|----------------------------|---------------------------------|-----------------------------|-----------------------------|---------------------------------------------------------------------------------------------------------------------------------------------------------------------------|-----------------------------------------------------------------------------------------------------------------|-------------------------------------------------------------------------------------------------|------------------------------------------------------------------------------------------------------------------------------------------------------------------|------------------|
| Li (2015)[162]              | Adult; Pediatric; Neonatal | Execution                       | Process; Structure          | Effective; Efficient        | Availability of complete and accurate discharge information; Timeliness of discharge (time of day, delay); Continuity of patient care;                                    | (F) Provider-patient communication; Family engagement/support; Written communication;                           | (F) Provider-provider communication; Collaboration between ICU and ward;                        | (None)                                                                                                                                                           | (None)           |
| Alali (2019)[163]           | Pediatric                  | Planning; Execution; Follow-up  | Process; Structure; Outcome | Efficient; Safe; Timely     | Planning for discharge; Standardizing the discharge process; Timeliness of discharge (time of day, delay); Evaluating patient readiness for discharge;                    | (None)                                                                                                          | (F) Provider-provider communication; Collaboration between ICU and ward; Written documentation; | (F) Guidelines or policies; Education/training of providers; Tools to facilitate discharge; (F&B) Impact of current discharge practices; (B) Delay in discharge; | (None)           |
| Baker (2016)[164]           | Pediatric                  | Evaluation; Planning; Execution | Process                     | Efficient; Patient centered | Discharge education for patients and families; Standardizing the discharge process; Evaluating patient readiness for discharge; Discharge education for providers;        | (F) Discharge education; (B) Patient demographic and clinical characteristics;                                  | (None)                                                                                          | (F) Guidelines or policies; Use of best practices; Tools to facilitate discharge;                                                                                | Educational tool |
| Bedford & Bench (2018)[165] | Pediatric                  | Execution                       | Process; Outcome            | Effective; Patient centered | Patient and family needs and experiences during discharge; Discharge education for patients and families; Adverse events, readmission, and mortality following discharge; | (F) Provider-patient communication; Discharge education; Family engagement/support; (B) Patient demographic and | (None)                                                                                          | (None)                                                                                                                                                           | (None)           |

*Patient Discharge from the ICU*

| Author (Year)           | Study Population | Phase(s) of Care      | Donabedian <sup>a</sup> | IoM <sup>b</sup>        | Themes                                                                                                                                                                                   | Patient & Family Facilitators (F) & Barriers (B)                                                                                                                                        | Provider Facilitators (F) & Barriers (B) | Organizational Facilitators (F) & Barriers (B)      | Tool                 |
|-------------------------|------------------|-----------------------|-------------------------|-------------------------|------------------------------------------------------------------------------------------------------------------------------------------------------------------------------------------|-----------------------------------------------------------------------------------------------------------------------------------------------------------------------------------------|------------------------------------------|-----------------------------------------------------|----------------------|
|                         |                  |                       |                         |                         | Anxiety associated with discharge; Continuity of patient care;                                                                                                                           | clinical characteristics; Feelings of anxiety or embarrassment; Physical and psychological effects of illness;                                                                          |                                          |                                                     |                      |
| Berube (2014)[166]      | Pediatric        | Execution             | Process; Structure      | Patient centered        | Patient and family needs and experiences during discharge; Discharge education for patients and families; Anxiety associated with discharge; Evaluating patient readiness for discharge; | (F) Provider-patient communication; Discharge education; Family engagement/support; (B) Feelings of anxiety or embarrassment;                                                           | (None)                                   | (None)                                              | (None)               |
| Crowe (2020)[167]       | Pediatric        | Execution; Follow-up  | Structure; Outcome      | Safe; Patient centered  | Patient and family needs and experiences during discharge; Anxiety associated with discharge; Autonomy;                                                                                  | (F) Discharge education; Family engagement/support; Patient/family treated as a member of healthcare team; (B) Feelings of anxiety or embarrassment; Expectations; Logistical barriers; | (None)                                   | (B) Impact of current discharge practices;          | (None)               |
| De la Oliva (2018)[168] | Pediatric        | Evaluation; Execution | Structure               | Efficient; Safe; Timely | Planning for discharge; Standardizing the discharge process; Timeliness of discharge (time of day, delay); Evaluating patient readiness for discharge; Resource use during discharge;    | (F&B) Patient demographic and clinical characteristics;                                                                                                                                 | (F) Provider-provider communication;     | (F) Guidelines or policies; (B) Delay in discharge; | Guideline/ checklist |

*Patient Discharge from the ICU*

| Author (Year)         | Study Population | Phase(s) of Care               | Donabedian <sup>a</sup> | IoM <sup>b</sup>                  | Themes                                                                                                                                                   | Patient & Family Facilitators (F) & Barriers (B)                | Provider Facilitators (F) & Barriers (B)                                                        | Organizational Facilitators (F) & Barriers (B)                                                                                                           | Tool   |
|-----------------------|------------------|--------------------------------|-------------------------|-----------------------------------|----------------------------------------------------------------------------------------------------------------------------------------------------------|-----------------------------------------------------------------|-------------------------------------------------------------------------------------------------|----------------------------------------------------------------------------------------------------------------------------------------------------------|--------|
| Ertugrul (2017)[169]  | Pediatric        | Execution; Follow-up           | Structure; Outcome      | Safe                              | Adverse events, readmission, and mortality following discharge;                                                                                          | (None)                                                          | (F) Clinical judgement or decision making;                                                      | (F) Impact of current discharge practices; Discharge location;                                                                                           | (None) |
| Foster (2019)[170]    | Pediatric        | Follow-up                      | Process                 | Patient centered                  | Patient and family needs and experiences during discharge; Anxiety associated with discharge; Continuity of patient care;                                | (F) Family engagement/ support;                                 | (F) Critical care transition program;                                                           | (F) Tools to facilitate discharge;                                                                                                                       | (None) |
| Frankel (2019)[171]   | Pediatric        | Evaluation; Follow-up          | Structure               | Effective; Efficient; Safe        | Availability of complete and accurate discharge information; Planning for discharge; Standardizing the discharge process; Resource use during discharge; | (F) Provider-patient communication; Family engagement/ support; | (F) Provider-provider communication; Collaboration between ICU and ward; Written documentation; | (F) Guidelines or policies; Education/ training of providers; Use of best practices; Impact of current discharge practices; Follow-up clinic or program; | (None) |
| Garcia (2020)[172]    | Pediatric        | Planning                       | Outcome                 | Patient centered                  | Patient and family needs and experiences during discharge; Planning for discharge; Evaluating patient readiness for discharge;                           | (F) Provider-patient communication;                             | (F) Provider-provider communication; Critical care transition program; Multidisciplinary team;  | (F) Guidelines or policies; Use of best practices; Discharge location;                                                                                   | (None) |
| Goldstein (2019)[173] | Pediatric        | Planning; Execution; Follow-up | Process                 | Effective; Safe; Patient centered | Patient and family needs and experiences during discharge; Discharge education for patients                                                              | (F) Discharge education; Expectations;                          | (F) Knowledge/ experience of provider;                                                          | (None)                                                                                                                                                   | (None) |

*Patient Discharge from the ICU*

| Author (Year)              | Study Population | Phase(s) of Care      | Donabedian <sup>a</sup> | IoM <sup>b</sup>            | Themes                                                                                                                                                                                                                                                                                                        | Patient & Family Facilitators (F) & Barriers (B)                                                                              | Provider Facilitators (F) & Barriers (B) | Organizational Facilitators (F) & Barriers (B)                                                                                      | Tool   |
|----------------------------|------------------|-----------------------|-------------------------|-----------------------------|---------------------------------------------------------------------------------------------------------------------------------------------------------------------------------------------------------------------------------------------------------------------------------------------------------------|-------------------------------------------------------------------------------------------------------------------------------|------------------------------------------|-------------------------------------------------------------------------------------------------------------------------------------|--------|
|                            |                  |                       |                         |                             | and families; Planning for discharge;                                                                                                                                                                                                                                                                         |                                                                                                                               |                                          |                                                                                                                                     |        |
| Graham (2019)[174]         | Pediatric        | Execution             | Structure               | Effective; Patient centered | Patient and family needs and experiences during discharge; Availability of complete and accurate discharge information; Discharge education for patients and families; Anxiety associated with discharge; Critical care transition program (nurse liaison, outreach team); Discharge education for providers; | (F) Provider-patient communication; Discharge education; Family engagement/support; (B) Feelings of anxiety or embarrassment; | (F) Critical care transition program;    | (F) Discharge location;                                                                                                             | (None) |
| Kennedy & Numa (2020)[175] | Pediatric        | Evaluation; Execution | Process                 | Efficient; Safe; Timely     | Timeliness of discharge (time of day, delay); Evaluating patient readiness for discharge;                                                                                                                                                                                                                     | (None)                                                                                                                        | (None)                                   | (F&B) Time of discharge; Discharge location; (B) Limited ICU and ward resources; Delay in discharge; Admission location before ICU; | (None) |
| Kroeger (2017)[176]        | Pediatric        | Planning; Follow-up   | Outcome                 | Effective; Safe             | Planning for discharge; Adverse events, readmission, and mortality following discharge; Evaluating patient readiness for discharge;                                                                                                                                                                           | (B) Patient demographic and clinical characteristics; ICU or hospital length of stay;                                         | (None)                                   | (B) Hospital characteristics; Hospital or ICU capacity;                                                                             | (None) |

Patient Discharge from the ICU

| Author (Year)        | Study Population | Phase(s) of Care                | Donabedian <sup>a</sup> | IoM <sup>b</sup>            | Themes                                                                                                                                                              | Patient & Family Facilitators (F) & Barriers (B)                                          | Provider Facilitators (F) & Barriers (B)                                                                                               | Organizational Facilitators (F) & Barriers (B)                                | Tool                 |
|----------------------|------------------|---------------------------------|-------------------------|-----------------------------|---------------------------------------------------------------------------------------------------------------------------------------------------------------------|-------------------------------------------------------------------------------------------|----------------------------------------------------------------------------------------------------------------------------------------|-------------------------------------------------------------------------------|----------------------|
| Kulesa (2020)[177]   | Pediatric        | Evaluation; Planning; Execution | Process                 | Efficient; Patient centered | Planning for discharge; Standardizing the discharge process; Evaluating patient readiness for discharge; Resource use during discharge; Continuity of patient care; | (None)                                                                                    | (F) Provider-provider communication; Collaboration between ICU and ward; Written documentation; Clinical judgement or decision making; | (F) Tools to facilitate discharge; (B) Impact of current discharge practices; | Guideline/ checklist |
| Leyenaar (2016)[178] | Pediatric        | Follow-up                       | Outcome                 | Effective; Safe             | Adverse events, readmission, and mortality following discharge; Timeliness of discharge (time of day, delay); Resource use during discharge;                        | (None)                                                                                    | (F) Provider-provider communication; Collaboration between ICU and ward; Written documentation;                                        | (F&B) Impact of current discharge practices; (B) Delay in discharge;          | (None)               |
| Lobos (2015)[179]    | Pediatric        | Execution; Follow-up            | Process; Outcome        | Effective; Efficient        | Critical care transition program (nurse liaison, outreach team); Continuity of patient care;                                                                        | (F) Patient demographic and clinical characteristics;                                     | (F) Critical care transition program;                                                                                                  | (F) Impact of current discharge practices;                                    | (None)               |
| Manente (2017)[180]  | Pediatric        | Planning                        | Structure               | Patient centered            | Patient and family needs and experiences during discharge; Discharge education for patients and families; Planning for discharge;                                   | (F) Discharge education; Written communication; (B) Feelings of anxiety or embarrassment; | (None)                                                                                                                                 | (F) Tools to facilitate discharge;                                            | Transfer brochure    |
| Moore (2015)[181]    | Pediatric        | Execution                       | Process                 | Effective; Patient centered | Patient and family needs and experiences during discharge; Discharge education for patients and families; Continuity of patient care; Autonomy;                     | (F) Provider-patient communication; Discharge education;                                  | (F) Provider-provider communication;                                                                                                   | (F) Use of best practices;                                                    | (None)               |



*Patient Discharge from the ICU*

| Author (Year)         | Study Population | Phase(s) of Care    | Donabedian <sup>a</sup> | IoM <sup>b</sup>                  | Themes                                                                                                                                                                                                                                                                                | Patient & Family Facilitators (F) & Barriers (B)                                                                       | Provider Facilitators (F) & Barriers (B)                                                                 | Organizational Facilitators (F) & Barriers (B)                                                                 | Tool                |
|-----------------------|------------------|---------------------|-------------------------|-----------------------------------|---------------------------------------------------------------------------------------------------------------------------------------------------------------------------------------------------------------------------------------------------------------------------------------|------------------------------------------------------------------------------------------------------------------------|----------------------------------------------------------------------------------------------------------|----------------------------------------------------------------------------------------------------------------|---------------------|
| Neupane (2015)[182]   | Pediatric        | Planning; Follow-up | Process; Structure      | Effective; Patient centered       | Planning for discharge; Adverse events, readmission, and mortality following discharge; Evaluating patient readiness for discharge; Continuity of patient care;                                                                                                                       | (F) Patient demographic and clinical characteristics; Provider-patient communication; Family engagement/support;       | (F) Provider-provider communication; Critical care transition program; Clear roles and responsibilities; | (F) Discharge location;                                                                                        | Guideline/checklist |
| Noje (2015)[183]      | Pediatric        | Execution           | Process; Structure      | Effective; Safe; Patient centered | Patient and family needs and experiences during discharge;                                                                                                                                                                                                                            | (F) Family engagement/support;                                                                                         | (F) Empathy;                                                                                             | (F&B) Discharge location;                                                                                      | (None)              |
| Obas (2016)[184]      | Pediatric        | Execution           | Process                 | Patient centered                  | Patient and family needs and experiences during discharge; Discharge education for patients and families; Planning for discharge; Continuity of patient care;                                                                                                                         | (F) Provider-patient communication; Discharge education; (F&B) Expectations; (B) Feelings of anxiety or embarrassment; | (F) Collaboration between ICU and ward;                                                                  | (None)                                                                                                         | (None)              |
| Orenstein (2019)[185] | Pediatric        | Planning; Execution | Structure               | Effective; Safe; Patient centered | Availability of complete and accurate discharge information; Planning for discharge; Standardizing the discharge process; Timeliness of discharge (time of day, delay); Evaluating patient readiness for discharge; Resource use during discharge; Discharge education for providers; | (None)                                                                                                                 | (F) Provider-provider communication; Knowledge/experience of provider; Written documentation;            | (F) Education/training of providers; Tools to facilitate discharge; (B) Impact of current discharge practices; | (None)              |
| Sheth (2016)[186]     | Pediatric        | Execution           | Process; Structure      | Efficient; Safe                   | Standardizing the discharge process;                                                                                                                                                                                                                                                  | (None)                                                                                                                 | (F) Provider-provider                                                                                    | (F) Guidelines or policies;                                                                                    | Transfer tool       |

*Patient Discharge from the ICU*

| Author (Year)       | Study Population    | Phase(s) of Care    | Donabedian <sup>a</sup> | IoM <sup>b</sup>  | Themes                                                                                                                        | Patient & Family Facilitators (F) & Barriers (B)                            | Provider Facilitators (F) & Barriers (B)                                                      | Organizational Facilitators (F) & Barriers (B)                                  | Tool   |
|---------------------|---------------------|---------------------|-------------------------|-------------------|-------------------------------------------------------------------------------------------------------------------------------|-----------------------------------------------------------------------------|-----------------------------------------------------------------------------------------------|---------------------------------------------------------------------------------|--------|
|                     |                     |                     |                         |                   |                                                                                                                               |                                                                             | communication; Collaboration between ICU and ward;                                            | Education/training of providers; (B) Impact of current discharge practices;     |        |
| Smith (2018)[187]   | Pediatric           | Follow-up           | Outcome                 | Safe              | Adverse events, readmission, and mortality following discharge;                                                               | (F&B) Patient demographic and clinical characteristics;                     | (None)                                                                                        | (None)                                                                          | (None) |
| Sobotka (2020)[188] | Pediatric           | Execution           | Structure               | Effective; Safe   | Continuity of patient care; Discharge education for providers;                                                                | (None)                                                                      | (F) Provider-provider communication; (F&B) (Lack of) Knowledge/experience of provider;        | (F) Education/training of providers; (B) Impact of current discharge practices; | (None) |
| Vollmer (2013)[189] | Pediatric           | Planning; Execution | Process                 | Efficient; Timely | Availability of complete and accurate discharge information; Standardizing the discharge process; Continuity of patient care; | (None)                                                                      | (F) Written documentation; (F&B) (Lack of) Provider-provider communication;                   | (F) Guidelines or policies;                                                     | (None) |
| Warrick (2015)[190] | Pediatric           | Execution           | Process                 | Effective; Safe   | Standardizing the discharge process; Discharge education for providers;                                                       | (None)                                                                      | (F) Provider-provider communication; Written documentation; Clear roles and responsibilities; | (F) Education/training of providers; Impact of current discharge practices;     | (None) |
| Barone (2020)[191]  | Pediatric; Neonatal | Follow-up           | Process; Outcome        | Patient centered  | Patient and family needs and experiences during discharge; Anxiety associated with                                            | (F) Provider-patient communication; Discharge education; Family engagement/ | (None)                                                                                        | (F) Education/training of providers; Follow-up clinic or program;               | (None) |

*Patient Discharge from the ICU*

| Author (Year)         | Study Population    | Phase(s) of Care     | Donabedian <sup>a</sup> | IoM <sup>b</sup>                  | Themes                                                                                                                                                                                                                                      | Patient & Family Facilitators (F) & Barriers (B)                                                                                                                                                    | Provider Facilitators (F) & Barriers (B) | Organizational Facilitators (F) & Barriers (B)           | Tool                 |
|-----------------------|---------------------|----------------------|-------------------------|-----------------------------------|---------------------------------------------------------------------------------------------------------------------------------------------------------------------------------------------------------------------------------------------|-----------------------------------------------------------------------------------------------------------------------------------------------------------------------------------------------------|------------------------------------------|----------------------------------------------------------|----------------------|
|                       |                     |                      |                         |                                   | discharge; Continuity of patient care;                                                                                                                                                                                                      | support; (B) Patient demographic and clinical characteristics; Feelings of anxiety or embarrassment;                                                                                                |                                          |                                                          |                      |
| Morton K. (2019)[192] | Pediatric; Neonatal | Planning; Execution  | Process; Structure      | Patient centered                  | Patient and family needs and experiences during discharge; Autonomy;                                                                                                                                                                        | (B) Expectations; Lack of provider-patient communication;                                                                                                                                           | (B) Provider anxiety;                    | (F) Follow-up clinic or program; (B) Discharge location; | (None)               |
| Amirani (2018)[193]   | Neonatal            | Planning             | Process                 | Patient centered                  | Discharge education for patients and families; Planning for discharge;                                                                                                                                                                      | (F) Discharge education; Self-efficacy;                                                                                                                                                             | (None)                                   | (None)                                                   | (None)               |
| Aydon (2017)[194]     | Neonatal            | Planning; Execution  | Process                 | Patient centered                  | Patient and family needs and experiences during discharge; Availability of complete and accurate discharge information; Discharge education for patients and families; Planning for discharge; Anxiety associated with discharge; Autonomy; | (F) Provider-patient communication; Discharge education; Family engagement/support; Patient/family treated as a member of healthcare team; Self-efficacy; (B) Feelings of anxiety or embarrassment; | (None)                                   | (None)                                                   | (None)               |
| Bapat (2016)[195]     | Neonatal            | Execution; Follow-up | Process; Outcome        | Effective; Safe; Patient centered | Patient and family needs and experiences during discharge; Discharge education for patients and families; Planning for discharge; Adverse events, readmission, and mortality following discharge;                                           | (F) Discharge education; (F&B) Patient demographic and clinical characteristics; (B) ICU or hospital length of stay; Financial obstacles;                                                           | (None)                                   | (None)                                                   | Guideline/ checklist |

*Patient Discharge from the ICU*

| Author (Year)            | Study Population | Phase(s) of Care                           | Donabedian <sup>a</sup> | IoM <sup>b</sup>                  | Themes                                                                                                                                                                                                                                       | Patient & Family Facilitators (F) & Barriers (B)                                                                                                  | Provider Facilitators (F) & Barriers (B) | Organizational Facilitators (F) & Barriers (B) | Tool                 |
|--------------------------|------------------|--------------------------------------------|-------------------------|-----------------------------------|----------------------------------------------------------------------------------------------------------------------------------------------------------------------------------------------------------------------------------------------|---------------------------------------------------------------------------------------------------------------------------------------------------|------------------------------------------|------------------------------------------------|----------------------|
| Barkemeyer (2015)[196]   | Neonatal         | Evaluation; Planning; Execution; Follow-up | Process; Outcome        | Safe                              | Planning for discharge; Evaluating patient readiness for discharge; Continuity of patient care;                                                                                                                                              | (F) Provider-patient communication; (B) Patient demographic and clinical characteristics;                                                         | (None)                                   | (F) Use of best practices;                     | (None)               |
| Bathie (2013)[197]       | Neonatal         | Execution                                  | Process                 | Effective; Patient centered       | Critical care transition program (nurse liaison, outreach team); Evaluating patient readiness for discharge; Continuity of patient care;                                                                                                     | (F) Discharge education; Family engagement/support;                                                                                               | (F) Critical care transition program;    | (None)                                         | Guideline/ checklist |
| Berman (2019)[198]       | Neonatal         | Evaluation; Planning; Follow-up            | Process; Outcome        | Effective; Safe; Patient centered | Patient and family needs and experiences during discharge; Discharge education for patients and families; Planning for discharge; Anxiety associated with discharge; Evaluating patient readiness for discharge; Continuity of patient care; | (F) Provider-patient communication; Discharge education; Family engagement/support; (F&B) Expectations; (B) Feelings of anxiety or embarrassment; | (F) Provider-provider communication;     | (None)                                         | (None)               |
| Bos (2018)[199]          | Neonatal         | Planning; Follow-up                        | Process; Outcome        | Effective; Patient centered       | Patient and family needs and experiences during discharge; Discharge education for patients and families; Planning for discharge; Anxiety associated with discharge;                                                                         | (F) Discharge education; Family engagement/support;                                                                                               | (None)                                   | (None)                                         | (None)               |
| Boss & Hobbs (2013)[200] | Neonatal         | Execution; Follow-up                       | Process; Outcome        | Effective; Safe; Patient centered | Adverse events, readmission, and mortality following                                                                                                                                                                                         | (F) Patient demographic and clinical characteristics;                                                                                             | (None)                                   | (B) Costs of healthcare provided;              | (None)               |

*Patient Discharge from the ICU*

| Author (Year)          | Study Population | Phase(s) of Care               | Donabedian <sup>a</sup> | IoM <sup>b</sup>                  | Themes                                                                                                                                                                                                    | Patient & Family Facilitators (F) & Barriers (B)                                                                                                                    | Provider Facilitators (F) & Barriers (B)                               | Organizational Facilitators (F) & Barriers (B) | Tool                 |
|------------------------|------------------|--------------------------------|-------------------------|-----------------------------------|-----------------------------------------------------------------------------------------------------------------------------------------------------------------------------------------------------------|---------------------------------------------------------------------------------------------------------------------------------------------------------------------|------------------------------------------------------------------------|------------------------------------------------|----------------------|
|                        |                  |                                |                         |                                   | discharge; Continuity of patient care;                                                                                                                                                                    | Family engagement/support;                                                                                                                                          |                                                                        |                                                |                      |
| Bowles (2016)[201]     | Neonatal         | Evaluation; Planning           | Process                 | Efficient; Safe; Patient centered | Discharge education for patients and families; Planning for discharge; Continuity of patient care;                                                                                                        | (F) Provider-patient communication; Discharge education; Family engagement/support;                                                                                 | (None)                                                                 | (F) Tools to facilitate discharge;             | Guideline/checklist  |
| Boykova (2016)[202]    | Neonatal         | Planning; Follow-up            | Outcome                 | Patient centered                  | Patient and family needs and experiences during discharge; Discharge education for patients and families;                                                                                                 | (F) Discharge education; (B) Expectations;                                                                                                                          | (None)                                                                 | (B) Costs of healthcare provided;              | (None)               |
| Brodsgaard (2015)[203] | Neonatal         | Planning; Execution; Follow-up | Process; Structure      | Effective; Patient centered       | Patient and family needs and experiences during discharge; Discharge education for patients and families; Planning for discharge; Standardizing the discharge process; Anxiety associated with discharge; | (F) Family engagement/support; Written communication; Expectations;                                                                                                 | (F) Provider-provider communication; Clear roles and responsibilities; | (F) Tools to facilitate discharge;             | Guideline/checklist  |
| Buck (2020)[204]       | Neonatal         | Evaluation                     | Process                 | Patient centered                  | Patient and family needs and experiences during discharge; Evaluating patient readiness for discharge;                                                                                                    | (F) Discharge education; Family engagement/support; (F&B) Patient demographic and clinical characteristics; (B) Feelings of anxiety or embarrassment; Expectations; | (None)                                                                 | (F) Tools to facilitate discharge;             | Discharge assessment |

*Patient Discharge from the ICU*

| Author (Year)                | Study Population | Phase(s) of Care      | Donabedian <sup>a</sup> | IoM <sup>b</sup> | Themes                                                                                                                                       | Patient & Family Facilitators (F) & Barriers (B)                   | Provider Facilitators (F) & Barriers (B) | Organizational Facilitators (F) & Barriers (B)                    | Tool                 |
|------------------------------|------------------|-----------------------|-------------------------|------------------|----------------------------------------------------------------------------------------------------------------------------------------------|--------------------------------------------------------------------|------------------------------------------|-------------------------------------------------------------------|----------------------|
| Burgoa-Larrañaga (2015)[205] | Neonatal         | Execution; Follow-up  | Process; Outcome        | Effective; Safe  | Adverse events, readmission, and mortality following discharge;                                                                              | (F) Provider-patient communication;                                | (None)                                   | (F) Impact of current discharge practices;                        | (None)               |
| Burnham (2013)[206]          | Neonatal         | Planning              | Process                 | Patient centered | Patient and family needs and experiences during discharge; Discharge education for patients and families; Anxiety associated with discharge; | (F) Discharge education; (B) Feelings of anxiety or embarrassment; | (None)                                   | (None)                                                            | (None)               |
| Carlos (2015)[207]           | Neonatal         | Execution             | Process                 | Patient centered | Standardizing the discharge process; Continuity of patient care;                                                                             | (F&B) Patient demographic and clinical characteristics;            | (None)                                   | (F) Hospital characteristics;                                     | (None)               |
| Carty (2018)[208]            | Neonatal         | Planning              | Structure               | Patient centered | Patient and family needs and experiences during discharge; Discharge education for patients and families;                                    | (F) Provider-patient communication; Discharge education;           | (None)                                   | (None)                                                            | Peer support program |
| Chen (2016)[209]             | Neonatal         | Planning              | Structure               | Patient centered | Discharge education for patients and families;                                                                                               | (F) Discharge education;                                           | (None)                                   | (None)                                                            | Educational tool     |
| Coughlin (2020)[210]         | Neonatal         | Execution             | Process                 | Effective        | Standardizing the discharge process;                                                                                                         | (None)                                                             | (None)                                   | (F) Use of best practices; Impact of current discharge practices; | (None)               |
| Cresi (2020)[211]            | Neonatal         | Evaluation; Execution | Process; Outcome        | Effective; Safe  | Adverse events, readmission, and mortality following discharge; Evaluating patient readiness for discharge;                                  | (F) Patient demographic and clinical characteristics;              | (None)                                   | (F) Tools to facilitate discharge;                                | Discharge assessment |

*Patient Discharge from the ICU*

| Author (Year)        | Study Population | Phase(s) of Care               | Donabedian <sup>a</sup> | IoM <sup>b</sup>         | Themes                                                                                                      | Patient & Family Facilitators (F) & Barriers (B)                                            | Provider Facilitators (F) & Barriers (B)                    | Organizational Facilitators (F) & Barriers (B)                                                                                              | Tool   |
|----------------------|------------------|--------------------------------|-------------------------|--------------------------|-------------------------------------------------------------------------------------------------------------|---------------------------------------------------------------------------------------------|-------------------------------------------------------------|---------------------------------------------------------------------------------------------------------------------------------------------|--------|
| Daicampi (2019)[212] | Neonatal         | Evaluation; Execution          | Process                 | Effective; Safe          | Evaluating patient readiness for discharge;                                                                 | (F&B) Patient demographic and clinical characteristics; (B) ICU or hospital length of stay; | (None)                                                      | (F) Use of best practices; Time of discharge; Impact of current discharge practices; Tools to facilitate discharge; (B) Delay in discharge; | (None) |
| Driscoll (2014)[213] | Neonatal         | Execution                      | Structure               | Efficient; Timely        | Availability of complete and accurate discharge information;                                                | (None)                                                                                      | (F) Provider-provider communication; Written documentation; | (None)                                                                                                                                      | (None) |
| Enlow (2014)[214]    | Neonatal         | Planning; Execution; Follow-up | Process; Outcome        | Patient centered         | Patient and family needs and experiences during discharge;                                                  | (F) Provider-patient communication; (B) Patient demographic and clinical characteristics;   | (None)                                                      | (None)                                                                                                                                      | (None) |
| Enlow (2017)[215]    | Neonatal         | Execution; Follow-up           | Process                 | Patient centered ; Equal | Patient and family needs and experiences during discharge; Anxiety associated with discharge;               | (F) Family engagement/ support; (B) Feelings of anxiety or embarrassment; Expectations;     | (None)                                                      | (F) Education/ training of providers;                                                                                                       | (None) |
| Enlow (2019)[216]    | Neonatal         | Planning                       | Process                 | Patient centered         | Discharge education for patients and families;                                                              | (F) Discharge education; (B) Feelings of anxiety or embarrassment;                          | (None)                                                      | (None)                                                                                                                                      | (None) |
| Ermarth (2019)[217]  | Neonatal         | Follow-up                      | Outcome                 | Effective; Safe          | Adverse events, readmission, and mortality following discharge; Evaluating patient readiness for discharge; | (F) Patient demographic and clinical characteristics;                                       | (None)                                                      | (F) Discharge location;                                                                                                                     | (None) |

*Patient Discharge from the ICU*

| Author (Year)        | Study Population | Phase(s) of Care                | Donabedian <sup>a</sup> | IoM <sup>b</sup>                     | Themes                                                                                                                                                  | Patient & Family Facilitators (F) & Barriers (B)                                                                                                                 | Provider Facilitators (F) & Barriers (B)                                                                                             | Organizational Facilitators (F) & Barriers (B) | Tool                 |
|----------------------|------------------|---------------------------------|-------------------------|--------------------------------------|---------------------------------------------------------------------------------------------------------------------------------------------------------|------------------------------------------------------------------------------------------------------------------------------------------------------------------|--------------------------------------------------------------------------------------------------------------------------------------|------------------------------------------------|----------------------|
| Feehan (2020)[218]   | Neonatal         | Execution                       | Process                 | Effective                            | Patient and family needs and experiences during discharge; Critical care transition program (nurse liaison, outreach team); Continuity of patient care; | (F) Discharge education; Family engagement/support;                                                                                                              | (F) Critical care transition program; Multidisciplinary team;                                                                        | (F) Tools to facilitate discharge;             | Transfer tool        |
| Fleming (2017)[219]  | Neonatal         | Planning                        | Process                 | Efficient; Patient centered          | Planning for discharge; Evaluating patient readiness for discharge;                                                                                     | (None)                                                                                                                                                           | (None)                                                                                                                               | (F) Guidelines or policies;                    | Guideline/ checklist |
| Gad (2017)[220]      | Neonatal         | Follow-up                       | Process                 | Efficient; Patient centered ; Timely | Availability of complete and accurate discharge information; Standardizing the discharge process; Discharge education for providers;                    | (F) Patient demographic and clinical characteristics; Family engagement/support;                                                                                 | (F) Provider-provider communication; Knowledge/experience of provider; Written documentation; Clinical judgement or decision making; | (F) Tools to facilitate discharge;             | (None)               |
| Garfield (2014)[221] | Neonatal         | Planning; Execution; Follow-up  | Process; Outcome        | Safe                                 | Patient and family needs and experiences during discharge; Planning for discharge; Anxiety associated with discharge; Autonomy;                         | (F) Provider-patient communication; Coping mechanisms; (B) Patient demographic and clinical characteristics; Feelings of anxiety or embarrassment; Expectations; | (F) Provider-provider communication;                                                                                                 | (None)                                         | (None)               |
| Giúdice (2018)[222]  | Neonatal         | Evaluation; Planning; Execution | Process                 | Safe; Patient centered               | Patient and family needs and experiences during                                                                                                         | (F) Discharge education; (B)                                                                                                                                     | (F) Provider-provider communication;                                                                                                 | (F) Guidelines or policies;                    | Guideline/ checklist |



*Patient Discharge from the ICU*

| Author (Year)              | Study Population | Phase(s) of Care     | Donabedian <sup>a</sup> | IoM <sup>b</sup>                  | Themes                                                                                                                                                                                                                     | Patient & Family Facilitators (F) & Barriers (B)                                                                                   | Provider Facilitators (F) & Barriers (B)                                      | Organizational Facilitators (F) & Barriers (B)                                                                         | Tool   |
|----------------------------|------------------|----------------------|-------------------------|-----------------------------------|----------------------------------------------------------------------------------------------------------------------------------------------------------------------------------------------------------------------------|------------------------------------------------------------------------------------------------------------------------------------|-------------------------------------------------------------------------------|------------------------------------------------------------------------------------------------------------------------|--------|
|                            |                  |                      |                         |                                   | discharge; Planning for discharge; Evaluating patient readiness for discharge; Continuity of patient care;                                                                                                                 | Feelings of anxiety or embarrassment;                                                                                              | Written documentation;                                                        |                                                                                                                        |        |
| Goldin (2020)[223]         | Neonatal         | Evaluation           | Structure               | Effective; Efficient              | Availability of complete and accurate discharge information; Standardizing the discharge process; Timeliness of discharge (time of day, delay); Evaluating patient readiness for discharge; Resource use during discharge; | (None)                                                                                                                             | (F) Knowledge/ experience of provider; Clinical judgement or decision making; | (F) Guidelines or policies; Education/ training of providers; Use of best practices; (B) Costs of healthcare provided; | (None) |
| Granero-Molina (2019)[224] | Neonatal         | Execution; Follow-up | Process; Outcome        | Patient centered                  | Patient and family needs and experiences during discharge; Anxiety associated with discharge;                                                                                                                              | (F) Expectations; (B) Patient demographic and clinical characteristics; Feelings of anxiety or embarrassment; Logistical barriers; | (F) Critical care transition program;                                         | (None)                                                                                                                 | (None) |
| Gupta (2019)[225]          | Neonatal         | Evaluation; Planning | Process; Structure      | Effective; Patient centered       | Patient and family needs and experiences during discharge; Planning for discharge; Anxiety associated with discharge; Evaluating patient readiness for discharge;                                                          | (F) Provider-patient communication; Discharge education; Family engagement/ support; (B) Feelings of anxiety or embarrassment;     | (None)                                                                        | (None)                                                                                                                 | (None) |
| Hobbs (2017)[226]          | Neonatal         | Follow-up            | Outcome                 | Effective; Safe; Patient centered | Patient and family needs and experiences during discharge; Availability                                                                                                                                                    | (F) Provider-patient communication; Written                                                                                        | (None)                                                                        | (F) Education/ training of providers;                                                                                  | (None) |

| Author (Year)          | Study Population | Phase(s) of Care     | Donabedian <sup>a</sup> | IoM <sup>b</sup>                  | Themes                                                                                                                                                                        | Patient & Family Facilitators (F) & Barriers (B)                                                                                                                                        | Provider Facilitators (F) & Barriers (B)                    | Organizational Facilitators (F) & Barriers (B) | Tool                 |
|------------------------|------------------|----------------------|-------------------------|-----------------------------------|-------------------------------------------------------------------------------------------------------------------------------------------------------------------------------|-----------------------------------------------------------------------------------------------------------------------------------------------------------------------------------------|-------------------------------------------------------------|------------------------------------------------|----------------------|
|                        |                  |                      |                         |                                   | of complete and accurate discharge information; Discharge education for patients and families; Anxiety associated with discharge; Continuity of patient care;                 | communication; Coping mechanisms; (B) Feelings of anxiety or embarrassment; Expectations;                                                                                               |                                                             |                                                |                      |
| Ingram (2016)[227]     | Neonatal         | Planning             | Process                 | Patient centered                  | Discharge education for patients and families; Planning for discharge; Evaluating patient readiness for discharge;                                                            | (F) Provider-patient communication; Discharge education; Expectations;                                                                                                                  | (None)                                                      | (None)                                         | Discharge assessment |
| Jefferies (2014)[228]  | Neonatal         | Evaluation; Planning | Process                 | Effective; Safe; Patient centered | Patient and family needs and experiences during discharge; Discharge education for patients and families; Planning for discharge; Evaluating patient readiness for discharge; | (F) Provider-patient communication; Discharge education; Family engagement/support; Written communication; (B) Patient demographic and clinical characteristics; Socioeconomic factors; | (F) Provider-provider communication; Written documentation; | (F) Follow-up clinic or program;               | (None)               |
| Kim (2017)[229]        | Neonatal         | Follow-up            | Outcome                 | Effective; Safe                   | Adverse events, readmission, and mortality following discharge; Resource use during discharge;                                                                                | (F) Patient demographic and clinical characteristics;                                                                                                                                   | (None)                                                      | (F) Impact of current discharge practices;     | (None)               |
| Lakshmanan (2019)[230] | Neonatal         | Execution            | Structure               | Patient centered                  | Patient and family needs and experiences during discharge; Discharge education for patients                                                                                   | (F) Provider-patient communication; Discharge education; Family                                                                                                                         | (None)                                                      | (F) Discharge location;                        | (None)               |

*Patient Discharge from the ICU*

| Author (Year)             | Study Population | Phase(s) of Care | Donabedian <sup>a</sup> | IoM <sup>b</sup>            | Themes                                                                                                                                                                              | Patient & Family Facilitators (F) & Barriers (B)                                                                                             | Provider Facilitators (F) & Barriers (B) | Organizational Facilitators (F) & Barriers (B) | Tool   |
|---------------------------|------------------|------------------|-------------------------|-----------------------------|-------------------------------------------------------------------------------------------------------------------------------------------------------------------------------------|----------------------------------------------------------------------------------------------------------------------------------------------|------------------------------------------|------------------------------------------------|--------|
|                           |                  |                  |                         |                             | and families; Anxiety associated with discharge; Autonomy;                                                                                                                          | engagement/ support; (B) Patient demographic and clinical characteristics; Feelings of anxiety or embarrassment; Financial obstacles;        |                                          |                                                |        |
| Lau (2019)[231]           | Neonatal         | Execution        | Structure               | Safe; Patient centered      | Patient and family needs and experiences during discharge; Discharge education for patients and families; Anxiety associated with discharge;                                        | (F) Provider-patient communication; Discharge education; (B) Feelings of anxiety or embarrassment; Financial obstacles; Logistical barriers; | (None)                                   | (None)                                         | (None) |
| Lee (2019)[232]           | Neonatal         | Follow-up        | Outcome                 | Patient centered            | Patient and family needs and experiences during discharge; Discharge education for patients and families; Adverse events, readmission, and mortality following discharge; Autonomy; | (F) Family engagement/ support; (B) Feelings of anxiety or embarrassment;                                                                    | (None)                                   | (B) Discharge location;                        | (None) |
| Litt (2018)[233]          | Neonatal         | Follow-up        | Process                 | Effective; Patient centered | Standardizing the discharge process; Adverse events, readmission, and mortality following discharge; Anxiety associated with discharge; Resource use during discharge;              | (F) Provider-patient communication;                                                                                                          | (F) Critical care transition program;    | (None)                                         | (None) |
| Lovejoy-Bluem (2014)[234] | Neonatal         | Planning         | Process                 | Patient centered            | Patient and family needs and                                                                                                                                                        | (F) Discharge education; Family                                                                                                              | (F) Critical care transition             | (B) Infrastructure;                            | (None) |

*Patient Discharge from the ICU*

| Author (Year)        | Study Population | Phase(s) of Care      | Donabedian <sup>a</sup> | IoM <sup>b</sup>         | Themes                                                                                                                                                                                                                                                    | Patient & Family Facilitators (F) & Barriers (B)                                                                                                                   | Provider Facilitators (F) & Barriers (B)    | Organizational Facilitators (F) & Barriers (B) | Tool   |
|----------------------|------------------|-----------------------|-------------------------|--------------------------|-----------------------------------------------------------------------------------------------------------------------------------------------------------------------------------------------------------------------------------------------------------|--------------------------------------------------------------------------------------------------------------------------------------------------------------------|---------------------------------------------|------------------------------------------------|--------|
|                      |                  |                       |                         |                          | experiences during discharge; Discharge education for patients and families; Planning for discharge; Evaluating patient readiness for discharge;                                                                                                          | engagement/ support;                                                                                                                                               | program; Knowledge/ experience of provider; |                                                |        |
| Lundberg (2016)[235] | Neonatal         | Evaluation; Follow-up | Process; Outcome        | Safe; Patient centered   | Adverse events, readmission, and mortality following discharge; Evaluating patient readiness for discharge;                                                                                                                                               | (B) Patient demographic and clinical characteristics; Feelings of anxiety or embarrassment;                                                                        | (F) Knowledge/ experience of provider;      | (None)                                         | (None) |
| McGowan (2017)[236]  | Neonatal         | Evaluation; Follow-up | Process; Outcome        | Patient centered ; Equal | Patient and family needs and experiences during discharge; Discharge education for patients and families; Anxiety associated with discharge; Critical care transition program (nurse liaison, outreach team); Evaluating patient readiness for discharge; | (F) Discharge education; (F&B) Patient demographic and clinical characteristics; (B) Feelings of anxiety or embarrassment; Expectations; Lack of familial support; | (F) Critical care transition program;       | (F) Tools to facilitate discharge;             | (None) |
| McGowan (2019)[237]  | Neonatal         | Planning              | Process                 | Patient centered         | Patient and family needs and experiences during discharge; Discharge education for patients and families; Planning for discharge; Anxiety associated with discharge; Evaluating patient readiness for discharge;                                          | (F) Provider-patient communication; Family engagement/ support; (B) Patient demographic and clinical characteristics;                                              | (None)                                      | (None)                                         | (None) |

*Patient Discharge from the ICU*

| Author (Year)                | Study Population | Phase(s) of Care               | Donabedian <sup>a</sup>     | IoM <sup>b</sup>       | Themes                                                                                                                                                                                                                                                             | Patient & Family Facilitators (F) & Barriers (B)                                 | Provider Facilitators (F) & Barriers (B)                                 | Organizational Facilitators (F) & Barriers (B)            | Tool                |
|------------------------------|------------------|--------------------------------|-----------------------------|------------------------|--------------------------------------------------------------------------------------------------------------------------------------------------------------------------------------------------------------------------------------------------------------------|----------------------------------------------------------------------------------|--------------------------------------------------------------------------|-----------------------------------------------------------|---------------------|
|                              |                  |                                |                             |                        |                                                                                                                                                                                                                                                                    | Feelings of anxiety or embarrassment;                                            |                                                                          |                                                           |                     |
| Moyer (2014)[238]            | Neonatal         | Planning; Execution; Follow-up | Process; Structure; Outcome | Safe; Patient centered | Patient and family needs and experiences during discharge; Discharge education for patients and families; Planning for discharge; Adverse events, readmission, and mortality following discharge; Critical care transition program (nurse liaison, outreach team); | (F) Provider-patient communication; Discharge education; Written communication;  | (None)                                                                   | (None)                                                    | (None)              |
| Murphy & Ehrhitz (2020)[239] | Neonatal         | Execution                      | Process; Structure          | Safe; Patient centered | Patient and family needs and experiences during discharge; Continuity of patient care; Discharge education for providers;                                                                                                                                          | (F) Discharge education;                                                         | (F) Provider-provider communication; Collaboration between ICU and ward; | (None)                                                    | (None)              |
| Murray (2016)[240]           | Neonatal         | Execution                      | Process                     | Safe; Patient centered | Discharge education for patients and families; Adverse events, readmission, and mortality following discharge; Continuity of patient care; Autonomy;                                                                                                               | (F) Provider-patient communication; Discharge education;                         | (None)                                                                   | (F) Education/training of providers;                      | (None)              |
| Noble (2018)[241]            | Neonatal         | Evaluation; Execution          | Process                     | Effective              | Patient and family needs and experiences during discharge; Planning for discharge; Evaluating patient readiness for discharge;                                                                                                                                     | (F) Patient demographic and clinical characteristics; Family engagement/support; | (None)                                                                   | (F) Use of best practices; Tools to facilitate discharge; | Guideline/checklist |

*Patient Discharge from the ICU*

| Author (Year)       | Study Population | Phase(s) of Care | Donabedian <sup>a</sup> | IoM <sup>b</sup>            | Themes                                                                                                                                                                                                                 | Patient & Family Facilitators (F) & Barriers (B)                                                                                                                                                                                                                                   | Provider Facilitators (F) & Barriers (B)                    | Organizational Facilitators (F) & Barriers (B) | Tool   |
|---------------------|------------------|------------------|-------------------------|-----------------------------|------------------------------------------------------------------------------------------------------------------------------------------------------------------------------------------------------------------------|------------------------------------------------------------------------------------------------------------------------------------------------------------------------------------------------------------------------------------------------------------------------------------|-------------------------------------------------------------|------------------------------------------------|--------|
| Osorio (2017)[242]  | Neonatal         | Execution        | Process                 | Patient centered            | Patient and family needs and experiences during discharge; Discharge education for patients and families; Anxiety associated with discharge;                                                                           | (F) Provider-patient communication; Discharge education; Family engagement/support; Written communication; Excited, joyous to be leaving ICU; (F&B) Patient demographic and clinical characteristics; (B) Feelings of anxiety or embarrassment; Expectations; Logistical barriers; | (F) Provider-provider communication;                        | (None)                                         | (None) |
| Peacock (2014)[243] | Neonatal         | Execution        | Process                 | Efficient; Patient centered | Planning for discharge; Standardizing the discharge process;                                                                                                                                                           | (None)                                                                                                                                                                                                                                                                             | (F) Provider-provider communication; Written documentation; | (F) Guidelines or policies;                    | (None) |
| Peyrovi (2016)[244] | Neonatal         | Planning         | Process; Outcome        | Effective; Patient centered | Patient and family needs and experiences during discharge; Discharge education for patients and families; Planning for discharge; Evaluating patient readiness for discharge; Resource use during discharge; Autonomy; | (F) Provider-patient communication; Discharge education; Family engagement/support; Written communication;                                                                                                                                                                         | (None)                                                      | (None)                                         | (None) |
| Pineda (2020)[245]  | Neonatal         | Follow-up        | Structure; Outcome      | Effective; Efficient        | Critical care transition program (nurse liaison, outreach)                                                                                                                                                             | (None)                                                                                                                                                                                                                                                                             | (F) Critical care transition program;                       | (F) Follow-up clinic or program; (B) Costs of  | (None) |

*Patient Discharge from the ICU*

| Author (Year)       | Study Population | Phase(s) of Care    | Donabedian <sup>a</sup> | IoM <sup>b</sup>         | Themes                                                                                                                                                           | Patient & Family Facilitators (F) & Barriers (B)                                                                                      | Provider Facilitators (F) & Barriers (B) | Organizational Facilitators (F) & Barriers (B)                     | Tool   |
|---------------------|------------------|---------------------|-------------------------|--------------------------|------------------------------------------------------------------------------------------------------------------------------------------------------------------|---------------------------------------------------------------------------------------------------------------------------------------|------------------------------------------|--------------------------------------------------------------------|--------|
|                     |                  |                     |                         |                          | team); Resource use during discharge;                                                                                                                            |                                                                                                                                       |                                          | healthcare provided;                                               |        |
| Purdy (2015)[246]   | Neonatal         | Planning; Follow-up | Process                 | Patient centered         | Patient and family needs and experiences during discharge; Discharge education for patients and families; Planning for discharge; Resource use during discharge; | (F) Provider-patient communication; Discharge education; Family engagement/ support;                                                  | (None)                                   | (None)                                                             | (None) |
| Quinn (2017)[247]   | Neonatal         | Planning            | Process                 | Safe; Patient centered   | Patient and family needs and experiences during discharge; Discharge education for patients and families; Standardizing the discharge process;                   | (F) Discharge education; Family engagement/ support; Expectations;                                                                    | (None)                                   | (F) Guidelines or policies;                                        | (None) |
| Raffray (2014)[248] | Neonatal         | Planning; Execution | Process; Structure      | Patient centered ; Equal | Patient and family needs and experiences during discharge; Discharge education for patients and families; Planning for discharge; Continuity of patient care;    | (F) Provider-patient communication; Discharge education; (B) Patient demographic and clinical characteristics; Socioeconomic factors; | (F) Knowledge/ experience of provider;   | (F) Education/ training of providers; Follow-up clinic or program; | (None) |
| Raines (2013)[249]  | Neonatal         | Execution           | Process                 | Patient centered         | Patient and family needs and experiences during discharge; Anxiety associated with discharge;                                                                    | (F) Provider-patient communication; Family engagement/ support; (B) Feelings of anxiety or embarrassment;                             | (None)                                   | (None)                                                             | (None) |

*Patient Discharge from the ICU*

| Author (Year)         | Study Population | Phase(s) of Care | Donabedian <sup>a</sup> | IoM <sup>b</sup>       | Themes                                                                                                                                                               | Patient & Family Facilitators (F) & Barriers (B)                                                                                            | Provider Facilitators (F) & Barriers (B) | Organizational Facilitators (F) & Barriers (B) | Tool                |
|-----------------------|------------------|------------------|-------------------------|------------------------|----------------------------------------------------------------------------------------------------------------------------------------------------------------------|---------------------------------------------------------------------------------------------------------------------------------------------|------------------------------------------|------------------------------------------------|---------------------|
| Raines (2013)[250]    | Neonatal         | Follow-up        | Outcome                 | Patient centered       | Patient and family needs and experiences during discharge; Discharge education for patients and families; Planning for discharge;                                    | (F) Provider-patient communication; Discharge education; Family engagement/support; Expectations; (B) Feelings of anxiety or embarrassment; | (None)                                   | (None)                                         | (None)              |
| Raines (2017)[251]    | Neonatal         | Planning         | Process                 | Safe; Patient centered | Patient and family needs and experiences during discharge; Discharge education for patients and families; Planning for discharge; Anxiety associated with discharge; | (F) Discharge education; Family engagement/support; Expectations;                                                                           | (None)                                   | (F) Tools to facilitate discharge;             | Educational tool    |
| Reichert (2014)[252]  | Neonatal         | Planning         | Process; Structure      | Patient centered       | Patient and family needs and experiences during discharge; Discharge education for patients and families; Planning for discharge;                                    | (F) Provider-patient communication; Discharge education; Family engagement/support; Expectations;                                           | (F) Written documentation;               | (F) Tools to facilitate discharge;             | Guideline/checklist |
| Sabzevari (2019)[253] | Neonatal         | Planning         | Structure               | Safe; Patient centered | Patient and family needs and experiences during discharge; Discharge education for patients and families; Planning for discharge; Autonomy;                          | (F) Discharge education; Family engagement/support; Expectations;                                                                           | (None)                                   | (None)                                         | (None)              |
| Schell (2016)[254]    | Neonatal         | Follow-up        | Outcome                 | Safe                   | Adverse events, readmission, and mortality following discharge;                                                                                                      | (B) Patient demographic and clinical characteristics;                                                                                       | (None)                                   | (None)                                         | (None)              |



*Patient Discharge from the ICU*

| Author (Year)              | Study Population | Phase(s) of Care               | Donabedian <sup>a</sup> | IoM <sup>b</sup>            | Themes                                                                                                                                                                                                                                                                                                                         | Patient & Family Facilitators (F) & Barriers (B)                                                                                                                                                       | Provider Facilitators (F) & Barriers (B) | Organizational Facilitators (F) & Barriers (B) | Tool   |
|----------------------------|------------------|--------------------------------|-------------------------|-----------------------------|--------------------------------------------------------------------------------------------------------------------------------------------------------------------------------------------------------------------------------------------------------------------------------------------------------------------------------|--------------------------------------------------------------------------------------------------------------------------------------------------------------------------------------------------------|------------------------------------------|------------------------------------------------|--------|
|                            |                  |                                |                         |                             |                                                                                                                                                                                                                                                                                                                                | Socioeconomic factors;                                                                                                                                                                                 |                                          |                                                |        |
| Serlachius (2018)[255]     | Neonatal         | Planning; Execution            | Process                 | Patient centered            | Patient and family needs and experiences during discharge; Availability of complete and accurate discharge information; Planning for discharge; Anxiety associated with discharge; Autonomy;                                                                                                                                   | (F) Provider-patient communication; Written communication; (B) Expectations; Lack of provider-patient communication; Feelings of lack of control;                                                      | (None)                                   | (None)                                         | (None) |
| Setiawan (2019)[256]       | Neonatal         | Planning; Execution; Follow-up | Process; Outcome        | Effective; Patient centered | Patient and family needs and experiences during discharge; Availability of complete and accurate discharge information; Discharge education for patients and families; Planning for discharge; Anxiety associated with discharge; Critical care transition program (nurse liaison, outreach team); Continuity of patient care; | (F) Provider-patient communication; Discharge education; Family engagement/support; Written communication; (B) Patient demographic and clinical characteristics; Feelings of anxiety or embarrassment; | (None)                                   | (None)                                         | (None) |
| Syedfarajollah (2018)[257] | Neonatal         | Planning; Execution            | Process; Structure      | Effective; Efficient        | Discharge education for patients and families; Planning for discharge; Standardizing the discharge process; Evaluating patient                                                                                                                                                                                                 | (F) Discharge education;                                                                                                                                                                               | (F) Written documentation;               | (F) Tools to facilitate discharge;             | (None) |

*Patient Discharge from the ICU*

| Author (Year)          | Study Population | Phase(s) of Care                 | Donabedian <sup>a</sup> | IoM <sup>b</sup>       | Themes                                                                                                                                                                                                                                                                                                                                                | Patient & Family Facilitators (F) & Barriers (B)                                                                                                     | Provider Facilitators (F) & Barriers (B) | Organizational Facilitators (F) & Barriers (B)                      | Tool   |
|------------------------|------------------|----------------------------------|-------------------------|------------------------|-------------------------------------------------------------------------------------------------------------------------------------------------------------------------------------------------------------------------------------------------------------------------------------------------------------------------------------------------------|------------------------------------------------------------------------------------------------------------------------------------------------------|------------------------------------------|---------------------------------------------------------------------|--------|
|                        |                  |                                  |                         |                        | readiness for discharge;                                                                                                                                                                                                                                                                                                                              |                                                                                                                                                      |                                          |                                                                     |        |
| Smith (2020)[258]      | Neonatal         | Evaluation; Planning; Execution  | Process; Structure      | Effective              | Patient and family needs and experiences during discharge; Availability of complete and accurate discharge information; Discharge education for patients and families; Planning for discharge; Standardizing the discharge process; Anxiety associated with discharge; Evaluating patient readiness for discharge; Discharge education for providers; | (F) Provider-patient communication; Discharge education; Family engagement/support; Written communication; (B) Feelings of anxiety or embarrassment; | (F) Provider-provider communication;     | (F) Education/training of providers; Tools to facilitate discharge; | (None) |
| Snelling (2014)[259]   | Neonatal         | Evaluation; Execution; Follow-up | Process; Outcome        | Safe; Patient centered | Patient and family needs and experiences during discharge; Critical care transition program (nurse liaison, outreach team); Continuity of patient care;                                                                                                                                                                                               | (F) Family engagement/support; (B) Patient demographic and clinical characteristics; Feelings of anxiety or embarrassment;                           | (F) Critical care transition program;    | (None)                                                              | (None) |
| Sommer (2015)[260]     | Neonatal         | Follow-up                        | Process                 | Patient centered       | Patient and family needs and experiences during discharge; Anxiety associated with discharge;                                                                                                                                                                                                                                                         | (B) Feelings of anxiety or embarrassment; Lack of provider-patient communication;                                                                    | (None)                                   | (None)                                                              | (None) |
| Stanojevic (2018)[261] | Neonatal         | Evaluation; Planning;            | Process                 | Effective; Safe;       | Patient and family needs and                                                                                                                                                                                                                                                                                                                          | (F) Discharge education; Family                                                                                                                      | (None)                                   | (None)                                                              | (None) |

| Author (Year)           | Study Population | Phase(s) of Care               | Donabedian <sup>a</sup> | IoM <sup>b</sup>                  | Themes                                                                                                                                                                                                                               | Patient & Family Facilitators (F) & Barriers (B)                                                                                                                                                                                                            | Provider Facilitators (F) & Barriers (B)                                | Organizational Facilitators (F) & Barriers (B)                               | Tool   |
|-------------------------|------------------|--------------------------------|-------------------------|-----------------------------------|--------------------------------------------------------------------------------------------------------------------------------------------------------------------------------------------------------------------------------------|-------------------------------------------------------------------------------------------------------------------------------------------------------------------------------------------------------------------------------------------------------------|-------------------------------------------------------------------------|------------------------------------------------------------------------------|--------|
|                         |                  | Execution; Follow-up           |                         | Patient centered                  | experiences during discharge; Discharge education for patients and families; Planning for discharge; Evaluating patient readiness for discharge;                                                                                     | engagement/ support; (F&B) Patient demographic and clinical characteristics; (B) Feelings of anxiety or embarrassment;                                                                                                                                      |                                                                         |                                                                              |        |
| Temple (2015)[262]      | Neonatal         | Evaluation                     | Process                 | Efficient; Timely                 | Planning for discharge; Evaluating patient readiness for discharge;                                                                                                                                                                  | (F) Patient demographic and clinical characteristics;                                                                                                                                                                                                       | (None)                                                                  | (F) Impact of current discharge practices; Tools to facilitate discharge;    | (None) |
| Toly (2019)[263]        | Neonatal         | Planning; Execution; Follow-up | Process; Outcome        | Effective; Safe; Patient centered | Patient and family needs and experiences during discharge; Discharge education for patients and families; Planning for discharge; Adverse events, readmission, and mortality following discharge; Anxiety associated with discharge; | (F) Discharge education; Family engagement/ support; Coping mechanisms; (F&B) (Lack of) Provider-patient communication; (B) Feelings of anxiety or embarrassment; Expectations; Financial obstacles; Lack of familial support; Feelings of lack of control; | (F) Knowledge/ experience of provider;                                  | (F) Education/ training of providers; Impact of current discharge practices; | (None) |
| Toral-Lopez (2016)[264] | Neonatal         | Follow-up                      | Process; Structure      | Patient centered                  | Patient and family needs and experiences during discharge; Anxiety associated with discharge; Critical care transition program (nurse liaison, outreach team);                                                                       | (F) Provider-patient communication; Family engagement/ support;                                                                                                                                                                                             | (F) Critical care transition program; Clear roles and responsibilities; | (None)                                                                       | (None) |

*Patient Discharge from the ICU*

| Author (Year)           | Study Population | Phase(s) of Care     | Donabedian <sup>a</sup> | IoM <sup>b</sup>       | Themes                                                                                                                                                       | Patient & Family Facilitators (F) & Barriers (B)                                                                                                        | Provider Facilitators (F) & Barriers (B) | Organizational Facilitators (F) & Barriers (B)            | Tool   |
|-------------------------|------------------|----------------------|-------------------------|------------------------|--------------------------------------------------------------------------------------------------------------------------------------------------------------|---------------------------------------------------------------------------------------------------------------------------------------------------------|------------------------------------------|-----------------------------------------------------------|--------|
|                         |                  |                      |                         |                        | Continuity of patient care;                                                                                                                                  |                                                                                                                                                         |                                          |                                                           |        |
| Toral-Lopez (2017)[265] | Neonatal         | Planning; Follow-up  | Process; Structure      | Safe; Patient centered | Discharge education for patients and families; Planning for discharge;                                                                                       | (F) Discharge education; Family engagement/support;                                                                                                     | (None)                                   | (B) Costs of healthcare provided; Delay in discharge;     | (None) |
| Turner (2013)[266]      | Neonatal         | Planning; Follow-up  | Process; Outcome        | Patient centered       | Patient and family needs and experiences during discharge; Discharge education for patients and families; Anxiety associated with discharge; Autonomy;       | (F) Discharge education; Family engagement/support; Expectations;                                                                                       | (None)                                   | (None)                                                    | (None) |
| Van Kampen (2019)[267]  | Neonatal         | Execution            | Outcome                 | Safe                   | Discharge education for patients and families; Standardizing the discharge process;                                                                          | (F) Discharge education; (B) Patient demographic and clinical characteristics;                                                                          | (F) Critical care transition program;    | (F) Discharge location; (B) Costs of healthcare provided; | (None) |
| Veronez (2017)[268]     | Neonatal         | Execution; Follow-up | Process                 | Patient centered       | Patient and family needs and experiences during discharge; Anxiety associated with discharge;                                                                | (F) Family engagement/support; Expectations; (B) Feelings of anxiety or embarrassment;                                                                  | (None)                                   | (None)                                                    | (None) |
| Vohr (2018)[269]        | Neonatal         | Follow-up            | Outcome                 | Safe                   | Adverse events, readmission, and mortality following discharge; Critical care transition program (nurse liaison, outreach team); Continuity of patient care; | (F) Patient demographic and clinical characteristics; Discharge education; Family engagement/support; Written communication; (B) Socioeconomic factors; | (F) Critical care transition program;    | (None)                                                    | (None) |

*Patient Discharge from the ICU*

| Author (Year)          | Study Population | Phase(s) of Care    | Donabedian <sup>a</sup>     | IoM <sup>b</sup>                       | Themes                                                                                                                                                                                     | Patient & Family Facilitators (F) & Barriers (B)                                                                           | Provider Facilitators (F) & Barriers (B)         | Organizational Facilitators (F) & Barriers (B)     | Tool             |
|------------------------|------------------|---------------------|-----------------------------|----------------------------------------|--------------------------------------------------------------------------------------------------------------------------------------------------------------------------------------------|----------------------------------------------------------------------------------------------------------------------------|--------------------------------------------------|----------------------------------------------------|------------------|
| Voie (2018)[270]       | Neonatal         | Execution           | Process                     | Safe; Patient centered                 | Continuity of patient care;                                                                                                                                                                | (None)                                                                                                                     | (F&B) (Lack of) Provider-provider communication; | (None)                                             | (None)           |
| Vonderheid (2016)[271] | Neonatal         | Planning; Follow-up | Process; Structure; Outcome | Effective; Efficient; Patient centered | Patient and family needs and experiences during discharge; Anxiety associated with discharge; Critical care transition program (nurse liaison, outreach team); Continuity of patient care; | (F) Discharge education; (F&B) Patient demographic and clinical characteristics; (Lack of) Provider-patient communication; | (F) Critical care transition program;            | (None)                                             | (None)           |
| Walter (2019)[272]     | Neonatal         | Planning            | Process                     | Patient centered                       | Patient and family needs and experiences during discharge; Discharge education for providers;                                                                                              | (F) Family engagement/ support;                                                                                            | (F) Knowledge/ experience of provider;           | (F) Education/ training of providers;              | Educational tool |
| Waruingi (2015)[273]   | Neonatal         | Planning; Follow-up | Process; Outcome            | Efficient; Safe                        | Adverse events, readmission, and mortality following discharge; Continuity of patient care;                                                                                                | (None)                                                                                                                     | (F) Critical care transition program;            | (None)                                             | (None)           |
| Weiqing (2013)[274]    | Neonatal         | Planning; Execution | Process; Structure          | Patient centered                       | Patient and family needs and experiences during discharge; Discharge education for patients and families;                                                                                  | (F) Provider-patient communication; Discharge education; Family engagement/ support;                                       | (None)                                           | (F) Discharge location;                            | (None)           |
| Wellington (2016)[275] | Neonatal         | Planning; Execution | Process                     | Effective; Safe                        | Planning for discharge; Standardizing the discharge process; Resource use during discharge;                                                                                                | (None)                                                                                                                     | (F) Clinical judgement or decision making;       | (F) Guidelines or policies; Use of best practices; | (None)           |

*Patient Discharge from the ICU*

| Author (Year)         | Study Population | Phase(s) of Care               | Donabedian <sup>a</sup> | IoM <sup>b</sup>                       | Themes                                                                                                                                                                                      | Patient & Family Facilitators (F) & Barriers (B)                                    | Provider Facilitators (F) & Barriers (B)                                     | Organizational Facilitators (F) & Barriers (B)                                                      | Tool   |
|-----------------------|------------------|--------------------------------|-------------------------|----------------------------------------|---------------------------------------------------------------------------------------------------------------------------------------------------------------------------------------------|-------------------------------------------------------------------------------------|------------------------------------------------------------------------------|-----------------------------------------------------------------------------------------------------|--------|
| White (2019)[276]     | Neonatal         | Follow-up                      | Outcome                 | Efficient; Safe                        | Patient and family needs and experiences during discharge; Adverse events, readmission, and mortality following discharge; Critical care transition program (nurse liaison, outreach team); | (F) Provider-patient communication; Discharge education; Family engagement/support; | (F) Critical care transition program;                                        | (F) Impact of current discharge practices;                                                          | (None) |
| Willard (2018)[277]   | Neonatal         | Follow-up                      | Process; Outcome        | Effective; Efficient; Patient centered | Patient and family needs and experiences during discharge; Critical care transition program (nurse liaison, outreach team); Continuity of patient care;                                     | (F) Provider-patient communication; Discharge education;                            | (F) Critical care transition program; Knowledge/experience of provider;      | (None)                                                                                              | (None) |
| Williams (2018)[278]  | Neonatal         | Planning; Execution; Follow-up | Structure; Outcome      | Effective; Efficient; Safe; Timely     | Planning for discharge;                                                                                                                                                                     | (None)                                                                              | (F) Critical care transition program; Clinical judgement or decision making; | (F) Use of best practices; Impact of current discharge practices; (B) Costs of healthcare provided; | (None) |
| Xiu-Xiang (2013)[279] | Neonatal         | Planning; Execution            | Process                 | Safe; Patient centered                 | Patient and family needs and experiences during discharge; Discharge education for patients and families; Anxiety associated with discharge; Continuity of patient care;                    | (F) Discharge education; (B) Feelings of anxiety or embarrassment;                  | (None)                                                                       | (None)                                                                                              | (None) |

*Patient Discharge from the ICU*

| Author (Year)          | Study Population | Phase(s) of Care               | Donabedian <sup>a</sup> | IoM <sup>b</sup>            | Themes                                                                                                                                                                  | Patient & Family Facilitators (F) & Barriers (B)                                                                                                                                                                    | Provider Facilitators (F) & Barriers (B)   | Organizational Facilitators (F) & Barriers (B)                                                   | Tool   |
|------------------------|------------------|--------------------------------|-------------------------|-----------------------------|-------------------------------------------------------------------------------------------------------------------------------------------------------------------------|---------------------------------------------------------------------------------------------------------------------------------------------------------------------------------------------------------------------|--------------------------------------------|--------------------------------------------------------------------------------------------------|--------|
| Zahn (2020)[280]       | Neonatal         | Execution                      | Structure               | Effective; Efficient; Safe  | Standardizing the discharge process; Adverse events, readmission, and mortality following discharge; Medication reconciliation;                                         | (None)                                                                                                                                                                                                              | (F) Knowledge/ experience of provider;     | (F) Education/ training of providers; (B) Impact of current discharge practices; Infrastructure; | (None) |
| Zamanzadeh (2013)[281] | Neonatal         | Execution                      | Process                 | Effective; Patient centered | Patient and family needs and experiences during discharge; Discharge education for patients and families; St'                                                           | (F) Provider-patient communication; Discharge education; Family engagement/ support;                                                                                                                                | (F) Clinical judgement or decision making; | (F) Guidelines or policies; (B) Impact of current discharge practices; Delay in discharge;       | (None) |
| Zamanzadeh (2013)[282] | Neonatal         | Planning                       | Process                 | Patient centered            | Patient and family needs and experiences during discharge; Discharge education for patients and families; Planning for discharge; Anxiety associated with discharge;    | (F) Discharge education; Family engagement/ support; Expectations; (B) Feelings of anxiety or embarrassment;                                                                                                        | (None)                                     | (F) Impact of current discharge practices;                                                       | (None) |
| Zimmerman (2017)[283]  | Neonatal         | Planning; Execution; Follow-up | Process; Outcome        | Safe; Patient centered      | Patient and family needs and experiences during discharge; Discharge education for patients and families; Planning for discharge; Continuity of patient care; Autonomy; | (F) Provider-patient communication; Discharge education; Family engagement/ support; Written communication; Self-efficacy; Excited, joyous to be leaving ICU; (B) Patient demographic and clinical characteristics; | (None)                                     | (F) Education/ training of providers; (B) Restricted visitation;                                 | (None) |

*Patient Discharge from the ICU*

| Author (Year)         | Study Population | Phase(s) of Care               | Donabedian <sup>a</sup>     | IoM <sup>b</sup>            | Themes                                                                                                                                                                                              | Patient & Family Facilitators (F) & Barriers (B)                                                           | Provider Facilitators (F) & Barriers (B)                                    | Organizational Facilitators (F) & Barriers (B)     | Tool                 |
|-----------------------|------------------|--------------------------------|-----------------------------|-----------------------------|-----------------------------------------------------------------------------------------------------------------------------------------------------------------------------------------------------|------------------------------------------------------------------------------------------------------------|-----------------------------------------------------------------------------|----------------------------------------------------|----------------------|
|                       |                  |                                |                             |                             |                                                                                                                                                                                                     | Feelings of anxiety or embarrassment; Expectations;                                                        |                                                                             |                                                    |                      |
| Attfled (2018)[284]   | Not reported     | Execution                      | Structure                   | Efficient; Patient centered | Availability of complete and accurate discharge information; Standardizing the discharge process; Evaluating patient readiness for discharge; Medication reconciliation;                            | (None)                                                                                                     | (F) Provider-provider communication; Clear roles and responsibilities;      | (None)                                             | Guideline/ checklist |
| Busico (2019)[285]    | Not reported     | Execution; Follow-up           | Process                     | Effective; Efficient        | Patient and family needs and experiences during discharge; Critical care transition program (nurse liaison, outreach team); Evaluating patient readiness for discharge; Continuity of patient care; | (F&B) Patient demographic and clinical characteristics; (B) Physical and psychological effects of illness; | (F) Critical care transition program;                                       | (F) Follow-up clinic or program;                   | Guideline/ checklist |
| Cognet (2014)[286]    | Not reported     | Execution                      | Process; Structure          | Patient centered            | Standardizing the discharge process;                                                                                                                                                                | (B) Expectations;                                                                                          | (B) Lack of provider-provider communication;                                | (None)                                             | (None)               |
| Coombs (2015)[287]    | Not reported     | Planning; Execution; Follow-up | Process; Structure; Outcome | Effective; Patient centered | Patient and family needs and experiences during discharge; Planning for discharge; Autonomy;                                                                                                        | (F) Family engagement/ support; Expectations;                                                              | (F) Provider-provider communication; Clinical judgement or decision making; | (F) Guidelines or policies; Use of best practices; | (None)               |
| Cullinane (2013)[288] | Not reported     | Execution                      | Process                     | Safe; Patient centered      | Patient and family needs and experiences during discharge; Discharge education for patients                                                                                                         | (F) Provider-patient communication; (B) Feelings of                                                        | (None)                                                                      | (None)                                             | (None)               |



| Author (Year)        | Study Population | Phase(s) of Care | Donabedian <sup>a</sup> | IoM <sup>b</sup>                  | Themes                                                                                                                           | Patient & Family Facilitators (F) & Barriers (B)                                         | Provider Facilitators (F) & Barriers (B)                                                                                                       | Organizational Facilitators (F) & Barriers (B)                                                           | Tool                |
|----------------------|------------------|------------------|-------------------------|-----------------------------------|----------------------------------------------------------------------------------------------------------------------------------|------------------------------------------------------------------------------------------|------------------------------------------------------------------------------------------------------------------------------------------------|----------------------------------------------------------------------------------------------------------|---------------------|
|                      |                  |                  |                         |                                   | and families; Planning for discharge; Anxiety associated with discharge;                                                         | anxiety or embarrassment;                                                                |                                                                                                                                                |                                                                                                          |                     |
| de Grood (2019)[289] | Not reported     | Execution        | Process                 | Efficient; Patient centered       | Availability of complete and accurate discharge information; Standardizing the discharge process;                                | (None)                                                                                   | (F) Clinical judgement or decision making; Clear roles and responsibilities;                                                                   | (None)                                                                                                   | (None)              |
| Elliott (2013)[290]  | Not reported     | Follow-up        | Outcome                 | Efficient; Safe                   | Adverse events, readmission, and mortality following discharge; Critical care transition program (nurse liaison, outreach team); | (None)                                                                                   | (F) Critical care transition program; (B) Workload; Lack of provider-provider communication; Lack of knowledge/experience of provider;         | (B) Limited ICU and ward resources; Impact of current discharge practices; Discharge location; Staffing; | (None)              |
| Frølund (2013)[291]  | Not reported     | Execution        | Process; Structure      | Efficient; Safe; Patient centered | Patient and family needs and experiences during discharge; Planning for discharge; Continuity of patient care;                   | (F) Provider-patient communication;                                                      | (F) Provider-provider communication; Critical care transition program; (F&B) (Lack of) Knowledge/experience of provider; (B) Provider anxiety; | (F) Education/training of providers;                                                                     | (None)              |
| Guest (2017)[292]    | Not reported     | Execution        | Process; Structure      | Safe; Patient centered            | Timeliness of discharge (time of day, delay); Critical care transition program (nurse liaison, outreach team);                   | (B) Feelings of anxiety or embarrassment; Physical and psychological effects of illness; | (F) Provider-provider communication; Critical care transition program;                                                                         | (F) Education/training of providers; (B) Limited ICU and ward resources; Time of discharge;              | Guideline/checklist |

Patient Discharge from the ICU

| Author (Year)                     | Study Population | Phase(s) of Care                           | Donabedian <sup>a</sup> | IoM <sup>b</sup>                           | Themes                                                                                                                                                                                                                                                                                           | Patient & Family Facilitators (F) & Barriers (B)                                                   | Provider Facilitators (F) & Barriers (B)                                                                                                                                        | Organizational Facilitators (F) & Barriers (B)                                                                                               | Tool                 |
|-----------------------------------|------------------|--------------------------------------------|-------------------------|--------------------------------------------|--------------------------------------------------------------------------------------------------------------------------------------------------------------------------------------------------------------------------------------------------------------------------------------------------|----------------------------------------------------------------------------------------------------|---------------------------------------------------------------------------------------------------------------------------------------------------------------------------------|----------------------------------------------------------------------------------------------------------------------------------------------|----------------------|
|                                   |                  |                                            |                         |                                            |                                                                                                                                                                                                                                                                                                  |                                                                                                    | Written documentation;                                                                                                                                                          |                                                                                                                                              |                      |
| Häggström (2013)[293]             | Not reported     | Planning; Execution                        | Process                 | Effective; Efficient; Safe                 | Planning for discharge; Standardizing the discharge process; Resource use during discharge; Continuity of patient care;                                                                                                                                                                          | (B) Feelings of anxiety or embarrassment;                                                          | (F) Critical care transition program; Clinical judgement or decision making;                                                                                                    | (F) Use of best practices; Tools to facilitate discharge; (B) Impact of current discharge practices; Reduction in technology and monitoring; | (None)               |
| Häggström & Bäckström (2014)[294] | Not reported     | Evaluation; Planning; Execution; Follow-up | Process                 | Effective; Safe; Patient centered ; Timely | Discharge education for patients and families; Planning for discharge; Anxiety associated with discharge; Timeliness of discharge (time of day, delay); Critical care transition program (nurse liaison, outreach team); Evaluating patient readiness for discharge; Continuity of patient care; | (F) Provider-patient communication; Discharge education; (B) Feelings of anxiety or embarrassment; | (F) Provider-provider communication; Critical care transition program; Collaboration between ICU and ward; Knowledge/ experience of provider; Clear roles and responsibilities; | (B) Delay in discharge;                                                                                                                      | (None)               |
| Hall (2015)[295]                  | Not reported     | Execution; Follow-up                       | Process; Outcome        | Effective; Safe; Patient centered          | Availability of complete and accurate discharge information; Planning for discharge; Standardizing the discharge process;                                                                                                                                                                        | (None)                                                                                             | (F) Written documentation; (F&B) (Lack of) Provider-provider communication;                                                                                                     | (F) Tools to facilitate discharge;                                                                                                           | Guideline/ checklist |
| Johnson (2013)[296]               | Not reported     | Execution                                  | Process                 | Efficient; Timely                          | Timeliness of discharge (time of day, delay);                                                                                                                                                                                                                                                    | (None)                                                                                             | (None)                                                                                                                                                                          | (B) Time of discharge; Costs of healthcare                                                                                                   | (None)               |

*Patient Discharge from the ICU*

| Author (Year)            | Study Population | Phase(s) of Care     | Donabedian <sup>a</sup> | IoM <sup>b</sup>        | Themes                                                                                                                                           | Patient & Family Facilitators (F) & Barriers (B) | Provider Facilitators (F) & Barriers (B)                                                        | Organizational Facilitators (F) & Barriers (B)                                                       | Tool             |
|--------------------------|------------------|----------------------|-------------------------|-------------------------|--------------------------------------------------------------------------------------------------------------------------------------------------|--------------------------------------------------|-------------------------------------------------------------------------------------------------|------------------------------------------------------------------------------------------------------|------------------|
|                          |                  |                      |                         |                         |                                                                                                                                                  |                                                  |                                                                                                 | provided; Discharge location;                                                                        |                  |
| Kauppi (2018)[297]       | Not reported     | Execution            | Process; Structure      | Effective; Efficient    | Resource use during discharge;                                                                                                                   | (None)                                           | (B) Workload; Provider anxiety; Lack of knowledge/ experience of provider;                      | (B) Limited ICU and ward resources; Impact of current discharge practices; Hospital characteristics; | (None)           |
| Kowitlawakul (2015)[298] | Not reported     | Execution            | Process; Structure      | Patient centered        | Availability of complete and accurate discharge information; Standardizing the discharge process;                                                | (None)                                           | (F) Provider-provider communication; Collaboration between ICU and ward; (B) Workload;          | (F&B) Time of discharge;                                                                             | (None)           |
| Kraus (2016)[299]        | Not reported     | Execution            | Structure               | Effective               | Availability of complete and accurate discharge information; Standardizing the discharge process; Continuity of patient care;                    | (None)                                           | (F) Provider-provider communication; Collaboration between ICU and ward; Written documentation; | (None)                                                                                               | Discharge letter |
| Kumar (2015)[300]        | Not reported     | Execution; Follow-up | Process; Outcome        | Efficient; Safe; Timely | Adverse events, readmission, and mortality following discharge; Timeliness of discharge (time of day, delay); Discharge education for providers; | (None)                                           | (F) Collaboration between ICU and ward; (F&B) (Lack of) Provider-provider communication;        | (F) Education/ training of providers;                                                                | (None)           |
| Kwon (2014)[301]         | Not reported     | Planning; Follow-up  | Process                 | Patient centered        | Patient and family needs and experiences during discharge; Planning                                                                              | (F) Provider-patient communication; Family       | (None)                                                                                          | (None)                                                                                               | (None)           |

*Patient Discharge from the ICU*

| Author (Year)      | Study Population | Phase(s) of Care                | Donabedian <sup>a</sup>     | IoM <sup>b</sup>             | Themes                                                                                                                                              | Patient & Family Facilitators (F) & Barriers (B)                                  | Provider Facilitators (F) & Barriers (B)                                                                                                                           | Organizational Facilitators (F) & Barriers (B)                       | Tool   |
|--------------------|------------------|---------------------------------|-----------------------------|------------------------------|-----------------------------------------------------------------------------------------------------------------------------------------------------|-----------------------------------------------------------------------------------|--------------------------------------------------------------------------------------------------------------------------------------------------------------------|----------------------------------------------------------------------|--------|
|                    |                  |                                 |                             |                              | for discharge; Anxiety associated with discharge;                                                                                                   | engagement/support; (F&B) Expectations; (B) Feelings of anxiety or embarrassment; |                                                                                                                                                                    |                                                                      |        |
| Lin (2013)[302]    | Not reported     | Planning; Execution             | Process; Structure          | Efficient; Safe; Timely      | Planning for discharge; Critical care transition program (nurse liaison, outreach team);                                                            | (None)                                                                            | (F) Critical care transition program; Collaboration between ICU and ward; Written documentation; (B) Workload; Lack of provider-provider communication;            | (F&B) Impact of current discharge practices; (B) Delay in discharge; | (None) |
| Lin (2013)[303]    | Not reported     | Evaluation; Planning; Execution | Process                     | Effective; Efficient; Timely | Discharge education for patients and families; Planning for discharge; Timeliness of discharge (time of day, delay); Resource use during discharge; | (None)                                                                            | (F) Critical care transition program; Collaboration between ICU and ward; Clear roles and responsibilities; (B) Workload; Lack of provider-provider communication; | (B) Delay in discharge; Lack of education/training of providers;     | (None) |
| Ludin (2014)[304]  | Not reported     | Execution                       | Process                     | Effective                    | Discharge education for providers;                                                                                                                  | (None)                                                                            | (F) Knowledge/experience of provider;                                                                                                                              | (F) Education/training of providers;                                 | (None) |
| McNett (2019)[305] | Not reported     | Execution                       | Process; Structure; Outcome | Effective; Safe; Timely      | Planning for discharge; Adverse events, readmission, and mortality following discharge; Timeliness of discharge (time of day, delay);               | (F) Patient demographic and clinical characteristics;                             | (F) Provider-provider communication; Collaboration between ICU and ward;                                                                                           | (F) Impact of current discharge practices;                           | (None) |

Patient Discharge from the ICU

| Author (Year)        | Study Population | Phase(s) of Care    | Donabedian <sup>a</sup>     | IoM <sup>b</sup>        | Themes                                                                                                                                                    | Patient & Family Facilitators (F) & Barriers (B)                                   | Provider Facilitators (F) & Barriers (B)                                                | Organizational Facilitators (F) & Barriers (B)                                                                           | Tool                 |
|----------------------|------------------|---------------------|-----------------------------|-------------------------|-----------------------------------------------------------------------------------------------------------------------------------------------------------|------------------------------------------------------------------------------------|-----------------------------------------------------------------------------------------|--------------------------------------------------------------------------------------------------------------------------|----------------------|
| Messing (2015)[306]  | Not reported     | Execution           | Structure                   | Efficient               | Availability of complete and accurate discharge information; Standardizing the discharge process;                                                         | (None)                                                                             | (F) Provider-provider communication; Written documentation;                             | (F) Tools to facilitate discharge;                                                                                       | Transfer tool        |
| Morgan (2018)[307]   | Not reported     | Execution           | Process; Outcome            | Safe; Timely            | Adverse events, readmission, and mortality following discharge; Timeliness of discharge (time of day, delay);                                             | (None)                                                                             | (None)                                                                                  | (F&B) Time of discharge;                                                                                                 | (None)               |
| Nates (2016)[308]    | Not reported     | Planning; Execution | Process; Structure          | Efficient; Safe; Timely | Standardizing the discharge process; Timeliness of discharge (time of day, delay);                                                                        | (F) Patient demographic and clinical characteristics;                              | (None)                                                                                  | (F) Guidelines or policies; Use of best practices; Time of discharge; Discharge location; Admission location before ICU; | Guideline/ checklist |
| Reader (2018)[309]   | Not reported     | Evaluation          | Process; Outcome            | Safe; Equal; Timely     | Evaluating patient readiness for discharge;                                                                                                               | (None)                                                                             | (F) Knowledge/ experience of provider;                                                  | (B) Limited ICU and ward resources; Costs of healthcare provided; Hospital characteristics;                              | (None)               |
| Teixeira (2018)[310] | Not reported     | Follow-up           | Process; Structure; Outcome | Safe; Patient centered  | Patient and family needs and experiences during discharge; Standardizing the discharge process; Critical care transition program (nurse liaison, outreach | (F) Family engagement/ support; (B) Physical and psychological effects of illness; | (F) Critical care transition program; Collaboration between ICU and ward; (B) Workload; | (F) Tools to facilitate discharge; (B) Costs of healthcare provided;                                                     | (None)               |

*Patient Discharge from the ICU*

| Author (Year)              | Study Population | Phase(s) of Care | Donabedian <sup>a</sup> | IoM <sup>b</sup> | Themes                                                                                                                      | Patient & Family Facilitators (F) & Barriers (B)                     | Provider Facilitators (F) & Barriers (B)                                                                                                                     | Organizational Facilitators (F) & Barriers (B)                         | Tool   |
|----------------------------|------------------|------------------|-------------------------|------------------|-----------------------------------------------------------------------------------------------------------------------------|----------------------------------------------------------------------|--------------------------------------------------------------------------------------------------------------------------------------------------------------|------------------------------------------------------------------------|--------|
|                            |                  |                  |                         |                  | team); Resource use during discharge; Medication reconciliation;                                                            |                                                                      |                                                                                                                                                              |                                                                        |        |
| Turnbull (2016)[311]       | Not reported     | Follow-up        | Outcome                 | Patient centered | Availability of complete and accurate discharge information; Anxiety associated with discharge; Continuity of patient care; | (F) Provider-patient communication; Expectations;                    | (F) Critical care transition program; Knowledge/ experience of provider; Clinical judgement or decision making; (B) Lack of provider-provider communication; | (None)                                                                 | (None) |
| Vijayaraghavan (2018)[312] | Not reported     | Follow-up        | Structure               | Effective; Safe  | Adverse events, readmission, and mortality following discharge; Continuity of patient care;                                 | (B) Patient demographic and clinical characteristics;                | (F) Provider-provider communication; Collaboration between ICU and ward; Multidisciplinary team;                                                             | (F) Use of best practices; Tools to facilitate discharge;              | (None) |
| Wong (2013)[313]           | Not reported     | Execution        | Process                 | Effective        | Availability of complete and accurate discharge information; Continuity of patient care;                                    | (B) Lack of provider-patient communication;                          | (F) Critical care transition program; Written documentation; (F&B) (Lack of) Provider-provider communication;                                                | (F) Tools to facilitate discharge;                                     | (None) |
| Yuan (2021)[314]           | Not reported     | Follow-up        | Outcome                 | Effective; Safe  | Adverse events, readmission, and mortality following discharge; Continuity of patient care;                                 | (F) Family engagement/ support; (B) Patient demographic and clinical | (F) Knowledge/ experience of provider;                                                                                                                       | (F) Guidelines or policies; (B) Impact of current discharge practices; | (None) |

| Author (Year) | Study Population | Phase(s) of Care | Donabedian <sup>a</sup> | IoM <sup>b</sup> | Themes | Patient & Family Facilitators (F) & Barriers (B)                | Provider Facilitators (F) & Barriers (B) | Organizational Facilitators (F) & Barriers (B) | Tool |
|---------------|------------------|------------------|-------------------------|------------------|--------|-----------------------------------------------------------------|------------------------------------------|------------------------------------------------|------|
|               |                  |                  |                         |                  |        | characteristics; Physical and psychological effects of illness; |                                          |                                                |      |

a. Donabedian framework elements include the process, structure, and outcome of discharge.

b. IoM = Institute of Medicine. This framework identifies the six domains of health care quality: Efficient, effective, safe, patient centered, timely, and equitable.

#### References:

1. Abitagaoglu S, Demiroglu O, Koksall C, Sezgin D, Turan G: Transition to home mechanical ventilation for geriatric patients with prolonged weaning. *Turk Geriatri Dergisi*. 2019, 22(1):18-24.
2. Academia EC, Gabriel CJ, Mueller A, Schwarz KA, Bartels K, Valuck RJ *et al*: Opioid prescribing after discharge in a previously mechanically ventilated, opioid-naïve cohort. *Ann Pharmacother*. 2020, 54(11):1065-1072.
3. Agard AS, Hofhuis JGM, Koopmans M, Gerritsen RT, Spronk PE, Engelberg RA *et al*: Identifying improvement opportunities for patient- and family-centered care in the ICU: Using qualitative methods to understand family perspectives. *J Crit Care*. 2019, 49:33-37.
4. Alberto L, Zotarez H, Canete AA, Niklas JEB, Enriquez JM, Geronimo MR *et al*: A description of the ICU liaison nurse role in Argentina. *Intensive Crit Care Nurs*. 2014, 30(1):31-37.
5. Allum L, Connolly B, McKeown E: Meeting the needs of critical care patients after discharge home: a qualitative exploratory study of patient perspectives. *Nurs Crit Care*. 2018, 23(6):316-323.
6. Amass TH, Villa G, Omahony S, Badger JM, McFadden R, Walsh T *et al*: Family care rituals in the ICU to reduce symptoms of post-traumatic stress disorder in family members-A multicenter, multinational, before-and-after intervention trial. *Crit Care Med*. 2020, 48(2):176-184.
7. Anthes AM, Harinstein LM, Smithburger PL, Seybert AL, Kane-Gill SL: Improving adverse drug event detection in critically ill patients through screening intensive care unit transfer summaries. *Pharmacoepidemiol Drug Saf*. 2013, 22(5):510-516.
8. Azevedo LCP, de Souza IA, Zygun DA, Stelfox HT, Bagshaw SM: Association between nighttime discharge from the intensive care unit and hospital mortality: A multi-center retrospective cohort study. *BMC Health Serv Res*. 2015, 15:378.
9. Bagshaw SM, Tran DT, Opgenorth D, Wang X, Zuege DJ, Ingolfsson A *et al*: Assessment of costs of avoidable delays in intensive care unit discharge. *JAMA Netw Open*. 2020, 3(8):e2013913.
10. Baldwin MR, Wunsch H, Reyfman PA, Narain WR, Blinderman CD, Schluger NW *et al*: High burden of palliative needs among older intensive care unit survivors transferred to post-acute care facilities. a single-center study. *Ann Am Thorac*. 2013, 10(5):458-465.
11. Balshi AN, Huwait BM, Noor ASN, Alharthy AM, Madi AF, Ramadan OE *et al*: Modified Early Warning Score as a predictor of intensive care unit readmission within 48 hours: a retrospective observational study. *Rev Bras Ter Intensiva*. 2020, 32(2):301-307.
12. Basmaji J, Lau V, Lam J, Priestap F, Ball IM: Lessons learned and new directions regarding Discharge Direct from Adult Intensive Care Units Sent Home (DISH): A narrative review. *J Intensive Care Soc*. 2019, 20(2):165-170.
13. Bench S, Day T, Griffiths P: Effectiveness of critical care discharge information in supporting early recovery from critical illness. *Crit Care Nurse*. 2013, 33(3):41-52.
14. Bench SD, Heelas K, White C, Griffiths P: Providing critical care patients with a personalised discharge summary: a questionnaire survey and retrospective analysis exploring feasibility and effectiveness. *Intensive Crit Care Nurs*. 2014, 30(2):69-76.

15. Bench S, Day T, Heelas K, Hopkins P, White C, Griffiths P: Evaluating the feasibility and effectiveness of a critical care discharge information pack for patients and their families: a pilot cluster randomised controlled trial. *BMJ Open*. 2015, 5(11):e006852.
16. Bench S, Cornish J, Xyrichis A: Intensive care discharge summaries for general practice staff: a focus group study. *Br J Gen Pract*. 2016, 66(653):e904-e912.
17. Bloom SL, Stollings JL, Kirkpatrick O, Wang L, Byrne DW, Sevin CM *et al*: Randomized clinical trial of an ICU recovery pilot program for survivors of critical illness. *Crit Care Med*. 2019, 47(10):1337-1345.
18. Bose S, Johnson AEW, Moskowitz A, Celi LA, Raffa JD: Impact of intensive care unit discharge delays on patient outcomes: A retrospective cohort study. *J Intensive Care Med*. 2019, 34(11-12):924-929.
19. Bosma LBE, Hunfeld NGM, Quax RAM, Meuwese E, Melief PHGJ, van Bommel J *et al*: The effect of a medication reconciliation program in two intensive care units in the Netherlands: a prospective intervention study with a before and after design. *Ann Intensive Care*. 2018, 8(1):19.
20. Bosma LBE, van Rein N, Hunfeld NGM, Steyerberg EW, Melief PHGJ, van den Bemt PMLA: Development of a multivariable prediction model for identification of patients at risk for medication transfer errors at ICU discharge. *PLoS One*. 2019, 14(4):e0215459.
21. Boyd JM, Roberts DJ, Parsons Leigh J, Stelfox HT: Administrator perspectives on ICU-to-ward transfers and content contained in existing transfer tools: A cross-sectional survey. *J Gen Intern Med*. 2018, 33(10):1738-1745.
22. Brown SES, Ratcliffe SJ, Halpern SD: An empirical derivation of the optimal time interval for defining ICU readmissions. *Med Care*. 2013, 51(8):706-714.
23. Brown KN, Leigh JP, Kamran H, Bagshaw SM, Fowler RA, Dodek PM *et al*: Transfers from intensive care unit to hospital ward: a multicentre textual analysis of physician progress notes. *Crit Care*. 2018, 22(1):19.
24. Chaboyer W, Lin F, Foster M, Retallick L, Panuwatwanich K, Richards B: Redesigning the ICU nursing discharge process: A quality improvement study. *Worldviews Evid Based Nurs*. 2012, 9(1):40-48.
25. Chatterjee S, Sinha S, Todi SK: Transfer time from the intensive care unit and patient outcome: A retrospective analysis from a tertiary care hospital in India. *Indian J Crit Care Med*. 2019, 23(3):115-121.
26. Choi S, Lee J, Shin Y, Lee J, Jung J, Han M *et al*: Effects of a medical emergency team follow-up programme on patients discharged from the medical intensive care unit to the general ward: a single-centre experience. *J Eval Clin Pract*. 2016, 22(3):356-362.
27. Choi J, Lingler JH, Donahoe MP, Happ MB, Hoffman LA, Tate JA: Home discharge following critical illness: A qualitative analysis of family caregiver experience. *Heart Lung*. 2018, 47(4):401-407.
28. Choi J, Tate JA, Son Y-J: Challenges experienced by family caregivers of the adult intensive care unit patients in Korea: An integrative review. *Clin Nurs Res*. 2020:1054773820918433.
29. Churpek MM, Wendlandt B, Zdravec FJ, Adhikari R, Winslow C, Edelson DP: Association between intensive care unit transfer delay and hospital mortality: A multicenter investigation. *J Hosp Med*. 2016, 11(11):757-762.
30. Coombs M, Long-Sutehall T, Darlington AS, Richardson A: Doctors' and nurses' views and experience of transferring patients from critical care home to die: A qualitative exploratory study. *Palliative Medicine*. 2015, 29(4):354-362.
31. Coombs MA, Darlington A-SE, Long-Sutehall T, Pattison N, Richardson A: Transferring patients home to die: what is the potential population in UK critical care units? *BMJ Support Palliat Care*. 2017, 7(1):98-101.
32. Coon EA, Kramer NM, Fabris RR, Burkholder DB, Klaas JP, Graff-Radford J *et al*: Structured handoff checklists improve clinical measures in patients discharged from the neurointensive care unit. *Neurol Clin Pract*. 2015, 5(1):42-49.
33. Correa TD, Ponzoni CR, Filho RR, Neto AS, Chaves RCdF, Pardini A *et al*: Nighttime intensive care unit discharge and outcomes: A propensity matched retrospective cohort study. *PLoS One*. 2018, 13(12):e0207268.



34. Coughlin DG, Kumar MA, Patel NN, Hoffman RL, Kasner SE: Preventing early bouncebacks to the neurointensive care unit: A retrospective analysis and quality improvement pilot. *Neurocrit Care*. 2018, 28(2):175-183.
35. Corner EJ, Soni N, Handy JM, Brett SJ: Construct validity of the Chelsea critical care physical assessment tool: an observational study of recovery from critical illness. *Crit Care*. 2014, 18(2):R55.
36. Cypress BS: Transfer out of intensive care: an evidence-based literature review. *Dimens Crit Care Nurs*. 2013, 32(5):244-261.
37. D'Angelo RG, Rincavage M, Tata AL, Millstein LS, Gulati MS, Flurie RW *et al*: Impact of an antipsychotic discontinuation bundle during transitions of care in critically ill patients. *J Intensive Care Med*. 2019, 34(1):40-47.
38. Darlington A-SE, Long-Sutehall T, Richardson A, Coombs MA: A national survey exploring views and experience of health professionals about transferring patients from critical care home to die. *Palliat Med*. 2015, 29(4):363-370.
39. de Grood C, Leigh JP, Bagshaw SM, Dodek PM, Fowler RA, Forster AJ *et al*: Patient, family and provider experiences with transfers from intensive care unit to hospital ward: a multicentre qualitative study. *CMAJ*. 2018, 190(22):E669-E676.
40. Detsky ME, Ailon J, Weinerman AS, Amaral AC, Bell CM: A two-site survey of clinicians to identify practices and preferences of intensive care unit transfers to general medical wards. *J Crit Care*. 2015, 30(2):358-362.
41. Ebrahimian A, Ghasemian-Nik H, Ghorbani R, Fakhr-Movahedi A: Development a reverse triage system based on modified sequential organ failure assessment for increasing the critical care surge capacity. *Indian J Crit Care Med*. 2018, 22(8):575-579.
42. Edenharter G, Gartner D, Heim M, Martin J, Pfeiffer U, Vogt F *et al*: Delay of transfer from the intensive care unit: a prospective observational analysis on economic effects of delayed in-house transfer. *Eur J Med Res*. 2019, 24(1):30.
43. El Hadidi S, Samir Bazan N, Byrne S, Darweesh E, Bermingham M: Heart failure prescribing quality at discharge from a critical care unit in Egypt: The impact of multidisciplinary care. *Pharmacy*. 2020, 8(3).
44. Enger R, Andershed B: Nurses' experience of the transfer of ICU patients to general wards: A great responsibility and a huge challenge. *J Clin Nurs*. 2018, 27(1-2):e186-e194.
45. Fabes J, Seligman W, Barrett C, McKechnie S, Griffiths J: Does the implementation of a novel intensive care discharge risk score and nurse-led inpatient review tool improve outcome? A prospective cohort study in two intensive care units in the UK. *BMJ open*. 2017, 7(12):e018322.
46. Fergusson NA, Ahkioon S, Ayas N, Dhingra VK, Chittock DR, Sekhon MS *et al*: Association between intensive care unit occupancy at discharge, afterhours discharges, and clinical outcomes: a historical cohort study. *Can J Anaesth*. 2020, 67(10):1359-1370.
47. Forster GM, Bihari S, Tiruvoipati R, Bailey M, Pilcher D: The association between discharge delay from intensive care and patient outcomes. *Am J Respir Crit Care Med*. 2020, 202(10):1399-1406.
48. Gantner D, Farley K, Bailey M, Huckson S, Hicks P, Pilcher D: Mortality related to after-hours discharge from intensive care in Australia and New Zealand, 2005-2012. *Intensive Care Med*. 2014, 40(10):1528-1535.
49. Garland A, Connors AF, Jr.: Optimal timing of transfer out of the intensive care unit. *Am J Crit Care*. 2013, 22(5):390-397.
50. Gilbert B, Morales JR, Searcy RJ, Johnson DW, Ferreira JA: Evaluation of neuroleptic utilization in the intensive care unit during transitions of care. *J Intensive Care Med*. 2017, 32(2):158-162.
51. Gimpel D, Shanbhag S, Srivastava T, MacLeod M, Conaglen P, Kejriwal N *et al*: Early discharge from intensive care after cardiac surgery is feasible with an adequate fast track, stepdown unit: Waikato experience. *Heart Lung Circ*. 2019, 28(12):1888-1895.
52. Goldstein A, Shahar Y, Orenbuch E, Cohen MJ: Evaluation of an automated knowledge-based textual summarization system for longitudinal clinical data, in the intensive care domain. *Artif Intell Med*. 2017, 82:20-33.
53. Gotur DB, Masud F, Paraniham J, Zimmerman JL: Analysis of rothman index data to predict postdischarge adverse events in a medical intensive care unit. *J Intensive Care Med*. 2018, 35(6):606-610.

54. Haggstrom M, Asplund K, Kristiansen L: Important quality aspects in the transfer process. *Int J Health Care Qual Assur.* 2014, 27(2):123-139.
55. Haggstrom M, Fjellner C, Ohman M, Rising Holmstrom M: Ward visits- one essential step in intensive care follow-up. An interview study with critical care nurses' and ward nurses'. *Intensive Crit Care Nurs.* 2018, 49:21-27.
56. Hajalizadeh A, Ahmadinejad M, Dehghan M, Arab M: Informational needs of the families of patients discharged from intensive care units: A case of Iran. *Int Q Community Health Educ.* 2020:272684X20972641.
57. Halvorson S, Wheeler B, Willis M, Watters J, Eastman J, O'Donnell R *et al*: A multidisciplinary initiative to standardize intensive care to acute care transitions. *Int J Qual Health Care.* 2016, 28(5):615-625.
58. Haraldsson L, Christensson L, Conlon L, Henricson M: The experiences of ICU patients during follow-up sessions - A qualitative study. *Intensive Crit Care Nurs.* 2015, 31(4):223-231.
59. Harlan EA, Valley TS: Navigating discharges from intensive care unit to ward. *Ann Am Thorac.* 2020, 17(7):807-808.
60. Herling SF, Brix H, Andersen L, Jensen LD, Handesten R, Knudsen H *et al*: Patient and spouses experiences with transition from intensive care unit to hospital ward - qualitative study. *Scand J Caring Sci.* 2020, 34(1):206-214.
61. Herve MEW, Zucatti PB, Lima MADDS: Transition of care at discharge from the Intensive Care Unit: a scoping review. *Rev Lat Am Enfermagem.* 2020, 28:e3325.
62. Heselmans A, van Krieken J, Cootjans S, Nagels K, Filliers D, Dillen K *et al*: Medication review by a clinical pharmacist at the transfer point from ICU to ward: a randomized controlled trial. *J Clin Pharm Ther.* 2015, 40(5):578-583.
63. Hoffman RL, Saucier J, Dasani S, Collins T, Holena DN, Fitzpatrick M *et al*: Development and implementation of a risk identification tool to facilitate critical care transitions for high-risk surgical patients. *Int J Qual Health Care.* 2017, 29(3):412-419.
64. Holland DE, Rhudy LM, Vanderboom CE, Bowles KH: Feasibility of discharge planning in intensive care units: A pilot study. *Am J Crit Care.* 2012, 21(4):e94-e101.
65. James S, Quirke S, McBride-Henry K: Staff perception of patient discharge from ICU to ward-based care. *Nurs Crit Care.* 2013, 18(6):297-306.
66. Jensen EK, Poulsen LM, Mathiesen O, Estrup S: Healthcare providers' knowledge and handling of impairments after intensive unit treatment: A questionnaire survey. *Acta Anaesthesiol Scand.* 2020, 64(4):532-537.
67. Jeong B-H, Na SJ, Lee D-S, Chung CR, Suh GY, Jeon K: Readmission and hospital mortality after ICU discharge of critically ill cancer patients. *PLoS One.* 2019, 14(1):e0211240.
68. Jolley SEMDM, Angus DCMDMPH, Clermont GMD, Hough CLMDM, Jolley SE, Angus DC *et al*: Discharge destination as a marker of mobility impairment in survivors of acute respiratory distress syndrome. *Crit Care Med.* 2019, 47(10):e814-e819.
69. Jonasdottir RJ, Klinke ME, Jonsdottir H: Integrative review of nurse-led follow-up after discharge from the ICU. *J Clin Nurs.* 2016, 25(1-2):20-37.
70. Jonasdottir RJ, Jones C, Sigurdsson GH, Jonsdottir H: Structured nurse-led follow-up for patients after discharge from the intensive care unit: Prospective quasi-experimental study. *J Adv Nurs.* 2018, 74(3):709-723.
71. Kastrup M, Powollik R, Balzer F, Röber S, Ahlborn R, von Dossow-Hanfstingl V *et al*: Predictive ability of the stability and workload index for transfer score to predict unplanned readmissions after ICU discharge\*. *Crit Care Med.* 2013, 41(7):1608-1615.
72. Kheir F, Shawwa K, Nguyen D, Alraiyes AH, Simeone F, Nielsen ND: A 24-hour postintensive care unit transition-of-care model shortens hospital stay. *J Intensive Care Med.* 2016, 31(9):597-602.
73. King J, O'Neill B, Ramsay P, Linden MA, Darweish Medniuk A, Outtrim J *et al*: Identifying patients' support needs following critical illness: a scoping review of the qualitative literature. *Crit Care.* 2019, 23(1):187.
74. Klepstad PK, Nordseth T, Sikora N, Klepstad P: Use of national early warning score for observation for increased risk for clinical deterioration during post-ICU care at a surgical ward. *Ther Clin Risk Manag.* 2019, 15:315-322.

75. Kohn R, Harhay MO, Bayes B, Song H, Halpern SD, Kerlin MP *et al*: The influence of geographic dispersion on outcomes of hospitalized pulmonary service patients. *Am J Respir Crit Care Med*. 2019, 199(9).
76. Kram BL, Schultheis JM, Kram SJ, Cox CE: A pharmacy-based electronic handoff tool to reduce discharge prescribing of atypical antipsychotics initiated in the intensive care unit: A quality improvement initiative. *J Pharm Pract*. 2019, 32(4):434-441.
77. Kram BL, Kram SJ, Brooks KR: Implications of atypical antipsychotic prescribing in the intensive care unit. *J Crit Care*. 2015, 30(4):814-818.
78. Kuang-Ming L, Chung-Han H, Chih-Cheng L, Chien-Ming C, Chong-Chi C, Shyh-Ren C *et al*: The association between depression and length of stay in the intensive care unit. *Medicine*. 2020, 99(23):1-7.
79. Kucukosman G, Kocakulak D, Ayoglu H: Assessment of patients discharged from the intensive care unit with tracheostomy: A retrospective analysis of single-center data. *Anestezi Dergisi*. 2020, 28(1):52-58.
80. Lam JNH, Lau VI, Priestap FA, Basmaji J, Ball IM: Patient, family, and physician satisfaction with planning for direct discharge to home from intensive care units: Direct from ICU sent home study. *J Intensive Care Med*. 2017, 35(1):82-90.
81. Lau VI, Priestap FA, Lam JNH, Ball IM: Factors associated with the increasing rates of discharges directly home from intensive care units-A direct from ICU sent home study. *J Intensive Care Med*. 2018, 33(2):121-127.
82. Lau VI, Priestap F, Lam JNH, Basmaji J, Ball IM: Clinical predictors for unsafe direct discharge home patients from intensive care units. *J Intensive Care Med*. 2018, 35(10):1067-1073.
83. Lau VI, Lam JNH, Basmaji J, Priestap FA, Ball IM: Survival and safety outcomes of ICU patients discharged directly home-A direct from ICU sent homes study. *Crit Care Med*. 2018, 46(6):900-906.
84. Lee S, Oh H, Suh Y, Seo W: A tailored relocation stress intervention programme for family caregivers of patients transferred from a surgical intensive care unit to a general ward. *J Clin Nurs*. 2017, 26(5-6):784-794.
85. Lekwijit S, Chan CW, Green LV, Liu VX, Escobar GJ: The impact of step-down unit care on patient outcomes after ICU discharge. *Crit Care Explor*. 2020, 2(5):e0114.
86. Lin Y, Myall M, Jarrett N: Uncovering the decision-making work of transferring dying patients home from critical care units: An integrative review. *J Adv Nurs*. 2017, 73(12):2864-2876.
87. Lin Y-W, Zhou Y, Faghri F, Shaw MJ, Campbell RH: Analysis and prediction of unplanned intensive care unit readmission using recurrent neural networks with long short-term memory. *PLoS One*. 2019, 14(7):e0218942.
88. Major ME, van Nes F, Ramaekers S, Engelbert RHH, van der Schaaf M: Survivors of critical illness and their relatives. A qualitative study on hospital discharge experience. *Ann Am Thorac*. 2019, 16(11):1405-1413.
89. Martin CM, Lam M, Allen B, Richard L, Lau V, Ball IM *et al*: Determinants of direct discharge home from critical care units: A population-based cohort analysis. *Crit Care Med*. 2020, 48(4):475-483.
90. Martin ND, Pisa M, Collins T, Robertson M, Sicoutris C, Bushan N *et al*: Advanced practitioner-driven critical care outreach to reduce intensive care unit readmission mortality. *Int J Acad Med*. 2015, 1(1):3-8.
91. McCairn AJ, Jones C: Does time of transfer from critical care to the general wards affect anxiety? A pragmatic prospective cohort study. *Intensive Crit Care Nurs*. 2014, 30(4):219-225.
92. McWilliams CJ, Lawson DJ, Santos-Rodriguez R, Gilchrist ID, Champneys A, Gould TH *et al*: Towards a decision support tool for intensive care discharge: machine learning algorithm development using electronic healthcare data from MIMIC-III and Bristol, UK. *BMJ Open*. 2019, 9(3):e025925.
93. Milton A, Schandl A, Soliman I, Joelsson-Alm E, van den Boogaard M, Wallin E *et al*: ICU discharge screening for prediction of new-onset physical disability-A multinational cohort study. *Acta Anaesthesiol Scand*. 2020, 64(6):789-797.

94. Milton A, Schandl A, Soliman IW, Meijers K, van den Boogaard M, Larsson IM *et al*: Development of an ICU discharge instrument predicting psychological morbidity: a multinational study. *Intensive Care Med*. 2018, 44(12):2038-2047.
95. Mion M, Al-Janabi F, Islam S, Magee N, Balasubramanian R, Watson N *et al*: Care after REsuscitation: Implementation of the United Kingdom's first dedicated multidisciplinary follow-up program for survivors of out-of-hospital cardiac arrest. *Ther Hypothermia Temp Manag*. 2020, 10(1):53-59.
96. Moore AJ, Castle L, Russell R, Manuel A: Discharging patients from ICU. *J Intensive Care Soc*. 2013, 14(3):271-272.
97. Moreira HE, Verga F, Barbato M, Burghi G: Prognostic impact of the time of admission and discharge from the intensive care unit. *Rev Bras Ter Intensiva*. 2017, 29(1):63-69.
98. Morris NA, Batra A, Biffi A, Cohen AB: Transfer delays from the neurologic intensive care unit: A prospective cohort study. *Neurohospitalist*. 2016, 6(2):59-63.
99. Morton B, Penston V, McHale P, Hungerford D, Dempsey G: Clinician perception of long-term survival at the point of critical care discharge: a prospective cohort study. *Anaesthesia*. 2020, 75(7):896-903.
100. Murray NM, Joshi AN, Kronfeld K, Hobbs K, Bernier E, Hirsch KG *et al*: A standardized checklist improves the transfer of stroke patients from the neurocritical care unit to hospital ward. *Neurohospitalist*. 2020, 10(2):100-108.
101. Ng YH, Pilcher DV, Bailey M, Bain CA, MacManus C, Bucknall TK: Predicting medical emergency team calls, cardiac arrest calls and re-admission after intensive care discharge: creation of a tool to identify at-risk patients. *Anaesth Intensive Care*. 2018, 46(1):88-96.
102. Niven DJ, Bastos JF, Stelfox HT: Critical care transition programs and the risk of readmission or death after discharge from an ICU: a systematic review and meta-analysis. *Crit Care Med*. 2014, 42(1):179-187.
103. Ofoma UR, Chandra S, Kashyap R, Herasevich V, Ahmed A, Gajic O *et al*: Findings from the implementation of a validated readmission predictive tool in the discharge workflow of a medical intensive care unit. *Ann Am Thorac*. 2014, 11(5):737-743.
104. Ofoma UR, Dong Y, Gajic O, Pickering BW: A qualitative exploration of the discharge process and factors predisposing to readmissions to the intensive care unit. *BMC Health Serv Res*. 2018, 18(1):6.
105. Ofoma UR, Montoya J, Saha D, Berger A, Kirchner HL, McIlwaine JK *et al*: Associations between hospital occupancy, intensive care unit transfer delay and hospital mortality. *J Crit Care*. 2020, 58:48-55.
106. Oh H, Lee S, Kim J, Lee E, Min H, Cho O *et al*: Clinical validity of a relocation stress scale for the families of patients transferred from intensive care units. *J Clin Nurs*. 2015, 24(13-14):1805-1814.
107. Ostergaard KL, Simonsen J, Hertzum M: The handover from intensive care unit to general ward: Baseline performance and participatory design of an electronic follow-up plan. *Stud Health Technol Inform*. 2019, 264:1303-1307.
108. Oud L, Chan YM: Predictors and variation of routine home discharge in critically ill adults with cystic fibrosis. *Heart Lung*. 2018, 47(5):511-515.
109. Parenmark F, Karlstrom G, Nolin T, Fredrikson M, Walther SM: Reducing night-time discharge from intensive care. A nationwide improvement project with public display of ICU outcomes. *J Crit Care*. 2019, 49:7-13.
110. Patel PM, Fiorella MA, Zheng A, McDonnell L, Yasuoka M, Yoo EJ: Characteristics and outcomes of patients discharged directly home from a medical intensive care unit: A retrospective cohort study. *J Intensive Care Med*. 2020:885066620960637.
111. Pattison N, O'Gara G, Rattray J: After critical care: patient support after critical care. A mixed method longitudinal study using email interviews and questionnaires. *Intensive Crit Care Nurs*. 2015, 31(4):213-222.
112. Peltonen L-M, McCallum L, Siirala E, Haataja M, Lundgren-Laine H, Salanterä S *et al*: An Integrative literature review of organisational factors associated with admission and discharge delays in critical care. *Biomed Res Int*. 2015, 2015:868653.
113. Peters JS: Role of transitional care measures in the prevention of readmission after critical illness. *Crit Care Nurse*. 2017, 37(1):e10-e17.

114. Powell M, Brown D, Davis C, Walsham J, Calleja P, Nielsen S *et al*: Handover practices of nurses transferring trauma patients from intensive care units to the ward: A multimethod observational study. *Aust Crit Care*. 2020, 33(6):538-545.
115. Rai S, Anthony L, Needham DM, Georgousopoulou EN, Sudheer B, Brown R *et al*: Barriers to rehabilitation after critical illness: a survey of multidisciplinary healthcare professionals caring for ICU survivors in an acute care hospital. *Aust Crit Care*. 2020, 33(3):264-271.
116. Ramos A, Benitez-Gutierrez L, Asensio A, Ruiz-Antoran B, Folguera C, Sanchez-Romero I *et al*: Erratum to antimicrobial stewardship in patients recently transferred to a ward from the ICU. *Rev Esp Quimioter*. 2014, 27(2):134-139.
117. Ramsay P, Huby G, Thompson A, Walsh T: Intensive care survivors' experiences of ward-based care: Meleis' theory of nursing transitions and role development among critical care outreach services. *J Clin Nurs*. 2014, 23(5-6):605-615.
118. Ramsay P, Huby G, Merriweather J, Salisbury L, Rattray J, Griffith D *et al*: Patient and carer experience of hospital-based rehabilitation from intensive care to hospital discharge: mixed methods process evaluation of the RECOVER randomised clinical trial. *BMJ open*. 2016, 6(8):e012041.
119. Ranzani OT, Zampieri FG, Taniguchi LU, Forte DN, Azevedo LCP, Park M: The effects of discharge to an intermediate care unit after a critical illness: a 5-year cohort study. *J Crit Care*. 2014, 29(2):230-235.
120. Rath K, Kreitzer N, Schlichter E, Lopez O, Ferioli S, Ngwenya LB *et al*: The experience of a neurocritical care admission and discharge for patients and their families: A qualitative analysis. *J Neurosci Nurs*. 2020, 52(4):179-185.
121. Reineck LA, Le TQ, Seymour CW, Barnato AE, Angus DC, Kahn JM: Effect of public reporting on intensive care unit discharge destination and outcomes. *Ann Am Thorac*. 2015, 12(1):57-63.
122. Rice M, Lear A, Kane-Gill S, Seybert AL, Smithburger PL: Pharmacy personnel's involvement in transitions of care of intensive care unit patients: A systematic review. *J Pharm Pract*. 2020:897190020911524.
123. Rizvi MS, Nei AM, Gajic O, Mara KC, Barreto EF: Continuation of newly initiated midodrine therapy after intensive care and hospital discharge: A single-center retrospective study. *Crit Care Med*. 2019, 47(8):e648-e653.
124. Rojas JC, Carey KA, Edelson DP, Venable LR, Howell MD, Churpek MM: Predicting intensive care unit readmission with machine learning using electronic health record data. *Ann Am Thorac*. 2018, 15(7):846-853.
125. Safavi KC, Furtado J, Zenteno Langle AC, Scheinker D, Schmidt U, Daily B *et al*: Non-clinical delays in transfer out of the surgical ICU are associated with increased hospital length of stay and delayed progress of care. *J Crit Care*. 2019, 50:126-131.
126. Sanson G, Marino C, Valenti A, Lucangelo U, Berlot G: Is my patient ready for a safe transfer to a lower-intensity care setting? Nursing complexity as an independent predictor of adverse events risk after ICU discharge. *Heart Lung*. 2020, 49(4):407-414.
127. Santamaria JD, Duke GJ, Pilcher DV, Cooper DJ, Moran J, Bellomo R *et al*: The timing of discharge from the intensive care unit and subsequent mortality. A prospective, multicenter study. *Am J Respir Crit Care Med*. 2015, 191(9):1033-1039.
128. Santhosh L, Lyons PG, Rojas JC, Ciesielski TM, Beach S, Farnan JM *et al*: Characterising ICU-ward handoffs at three academic medical centres: process and perceptions. *BMJ Qual Saf*. 2019, 28(8):627-634.
129. Sauro KM, Soo A, De Grood C, Yang MMH, Wierstra B, Benoit L *et al*: Adverse events after transition from ICU to hospital ward: A multicenter cohort study. *Crit Care Med*. 2020:946-953.
130. Sayde GE, Stefanescu A, Conrad E, Nielsen N, Hammer R: Implementing an intensive care unit (ICU) diary program at a large academic medical center: Results from a randomized control trial evaluating psychological morbidity associated with critical illness. *Gen Hosp Psychiatry*. 2020, 66:96-102.
131. Sevin CM, Bloom SL, Jackson JC, Wang L, Ely EW, Stollings JL: Comprehensive care of ICU survivors: Development and implementation of an ICU recovery center. *J Crit Care*. 2018, 46:141-148.
132. Sevin CM, Jackson JC: Post-ICU clinics should be staffed by ICU clinicians. *Crit Care Med*. 2019, 47(2):268-272.

133. Shimogai T, Izawa KP, Kawada M, Kuriyama A: Factors affecting discharge to home of medical patients treated in an intensive care unit. *Int J Environ Res Public Health*. 2019, 16(22).
134. Siddiqui S: Patients readmitted to the intensive care unit: can they be prevented? *Int Arch Med*. 2013, 6(1):18.
135. Sirvent JM, Gil M, Alvarez T, Martin S, Vila N, Colomer M *et al*: Lean techniques to improve the flow of critically ill patients in a health region with its epicenter in the intensive care unit of a reference hospital. *Med Intensiva*. 2016, 40(5):266-272.
136. Smith D, Hall D, Parke G, Lane R, Gray A: No place like home: A case study of a patient discharged from an Intensive Care Unit for end of life care at home. *J Intensive Care Soc*. 2018, 19(3):259-263.
137. Stelfox HT, Bastos J, Niven DJ, Bagshaw SM, Turin TC, Gao S: Critical care transition programs and the risk of readmission or death after discharge from ICU. *Intensive Care Med*. 2016, 42(3):401-410.
138. Stelfox HT, Parsons Leigh J, Dodek PM, Turgeon AF, Forster AJ, Lamontagne F *et al*: A multi-centre prospective cohort study of patient transfers from the intensive care unit to the hospital ward. *Am J Respir Crit Care Med*. 2017, 195.
139. Stelfox HT, Soo A, Niven DJ, Fiest KM, Wunsch H, Rowan KM *et al*: Assessment of the safety of discharging select patients directly home from the intensive care unit: A multicenter population-based cohort study. *JAMA Intern Med*. 2018, 178(10):1390-1399.
140. Szubski CR, Tellez A, Klika AK, Xu M, Kattan MW, Guzman JA *et al*: Predicting discharge to a long-term acute care hospital after admission to an intensive care unit. *Am J Crit Care*. 2014, 23(4):e46-53.
141. Taniguchi LU, Ramos FJdS, Momma AK, Martins Filho APR, Bartocci JJ, Lopes MFD *et al*: Subjective score and outcomes after discharge from the intensive care unit: a prospective observational study. *J Int Med Res*. 2019, 47(9):4183-4193.
142. Tully AP, Hammond DA, Li C, Jarrell AS, Krueger RM: Evaluation of medication errors at the transition of care from an ICU to non-ICU location. *Crit Care Med*. 2019, 47(4):543-549.
143. Uppanaisakorn S, Bhurayanontachai R, Boonyarat J, Kaewpradit J: National Early Warning Score (NEWS) at ICU discharge can predict early clinical deterioration after ICU transfer. *J Crit Care*. 2018, 43:225-229.
144. van Mol M, Nijkamp M, Markham C, Ista E: Using an intervention mapping approach to develop a discharge protocol for intensive care patients. *BMC Health Serv Res*. 2017, 17(1):837.
145. van Mol M, Ista E, van Dijk M: Implementation and evaluation of a follow-up programme after intensive care treatment: A practice development project. *Intensive Crit Care Nurs*. 2018, 49:6-13.
146. van Sluisveld N, Bakhshi-Raiez F, de Keizer N, Holman R, Wester G, Wollersheim H *et al*: Variation in rates of ICU readmissions and post-ICU in-hospital mortality and their association with ICU discharge practices. *BMC Health Serv Res*. 2017, 17(1):281.
147. Vollam S, Dutton S, Lamb S, Petrinic T, Young JD, Watkinson P: Out-of-hours discharge from intensive care, in-hospital mortality and intensive care readmission rates: a systematic review and meta-analysis. *Intensive Care Med*. 2018, 44(7):1115-1129.
148. Vollam S, Harrison DA, Young JD, Watkinson PJ: Does delaying discharge from intensive care until after tracheostomy removal affect 30-day mortality? Propensity score matched cohort study. *BMJ open*. 2020, 10(6):e037762.
149. Wagner J, Gabler NB, Ratcliffe SJ, Brown SES, Strom BL, Halpern SD: Outcomes among patients discharged from busy intensive care units. *Ann Intern Med*. 2013, 159(7):447-455.
150. White L: Going home to die from critical care: A case study. *Nurs Crit Care*. 2019, 24(4):235-240.
151. Won MH, Son Y-J: Development and psychometric evaluation of the Relocation Stress Syndrome Scale-Short Form for patients transferred from adult intensive care units to general wards. *Intensive Crit Care Nurs*. 2020, 58:102800.
152. Wood SD, Coster S, Norman I: Comparing the monitoring of patients transferred from a critical care unit to hospital wards at after-hours with day transfers: an exploratory, prospective cohort study. *J Adv Nurs*. 2014, 70(12):2757-2766.

153. Xing S, Roshdy A, Radhakrishnan J, Kiff K, Collins J: Discharge home from critical care: safety assessment in a resource constrained system. *J R Coll Physicians Edinb.* 2019, 49(1):23-25.
154. Yang S, Wang Z, Liu Z, Wang J, Ma L: Association between time of discharge from ICU and hospital mortality: a systematic review and meta-analysis. *Crit Care.* 2016, 20(1):390.
155. Yun SH, Oh EG, Yoo YS, Kim SS, Jang YS: Development and effects of a transition nursing program for patients and family caregivers at a neurological ICU in Korea. *Clin Nurs Res.* 2017, 26(1):27-46.
156. Zaidi H, Bader-El-Den M, McNicholas J: Using the National Early Warning Score (NEWS/NEWS 2) in different Intensive Care Units (ICUs) to predict the discharge location of patients. *BMC Public Health.* 2019, 19(1):1231.
157. Zilahi G, O'Connor E: Information sharing between intensive care and primary care after an episode of critical illness; A mixed methods analysis. *PLoS One.* 2019, 14(2):e0212438.
158. Tiruvoipati R, Botha J, Fletcher J, Gangopadhyay H, Majumdar M, Vij S *et al*: Intensive care discharge delay is associated with increased hospital length of stay: A multicentre prospective observational study. *PLoS ONE.* 2017, 12(7):e0181827.
159. van Sluisveld N, Hesselink G, van der Hoeven JG, Westert G, Wollersheim H, Zegers M: Improving clinical handover between intensive care unit and general ward professionals at intensive care unit discharge. *Intensive Care Med.* 2015, 41(4):589-604.
160. van Sluisveld N, Oerlemans A, Westert G, van der Hoeven JG, Wollersheim H, Zegers M: Barriers and facilitators to improve safety and efficiency of the ICU discharge process: a mixed methods study. *BMC Health Serv Res.* 2017, 17(1):251.
161. Herbst LA, Desai S, Bencosder D, Jerardi K, Meier KA, Statile AM *et al*: Going back to the ward-transitioning care back to the ward team. *Transl Pediatr.* 2018, 7(4):314-325.
162. Li P, Boyd JM, Ghali WA, Stelfox HT: Stakeholder views regarding patient discharge from intensive care: Suboptimal quality and opportunities for improvement. *Can Respir J.* 2015, 22(2):109-118.
163. Alali H, Kazzaz Y, Alshehri A, Antar M, Alhamouieh O, Hasan Z *et al*: Reducing unnecessary delays during the transfer of patients from the paediatric intensive care unit to the general ward: a quality improvement project. *BMJ Open Qual.* 2019, 8(3):e000695.
164. Baker CD, Martin S, Thrasher J, Moore HM, Baker J, Abman SH *et al*: A standardized discharge process decreases length of stay for ventilator-dependent children. *Pediatrics.* 2016, 137(4).
165. Bedford ZC, Bench S: A review of interventions supporting parent's psychological well-being after a child's intensive care unit discharge. *Nurs Crit Care.* 2019, 24(3):153-161.
166. Berube KM, Fothergill-Bourbonnais F, Thomas M, Moreau D: Parents' experience of the transition with their child from a pediatric intensive care unit (PICU) to the hospital ward: searching for comfort across transitions. *J Pediatr Nurs.* 2014, 29(6):586-595.
167. Crowe L, Simpson E, Reinhardt Z, Rankin J: Parental responsibility for pediatric ventricular assist devices: Views of families on the acceptability of hospital discharge. *Pediatr Transplant.* 2020, 24(1):e13636.
168. de la Oliva P, Cambra-Lasaosa FJ, Quintana-Diaz M, Rey-Galan C, Sanchez-Diaz JJ, Martin-Delgado MC *et al*: Admission, discharge and triage guidelines for paediatric intensive care units in Spain. *An Pediatr (Barc).* 2018, 42(4):235-246.
169. Ertugrul A, Bayrakci B, Ertugrul I, Kesici S, Gunes Yalcin E: Clinical evaluation of invasive home mechanical ventilation dependent pediatric patients. *Iran J Pediatr.* 2017, 27(4):e9531.
170. Foster K, Mitchell R, Young A, Van C, Curtis K: Parent experiences and psychosocial support needs 6 months following paediatric critical injury: A qualitative study. *Injury.* 2019, 50(5):1082-1088.
171. Frankel LR, Hsu BS, Yeh TS, Simone S, Agus MSD, Arca MJ *et al*: Criteria for critical care infants and children: PICU admission, discharge, and triage practice statement and levels of care guidance. *Pediatr Crit Care Med.* 2019, 20(9):847-887.

172. Garcia X, Frazier E, Kane J, Jones A, Brown C, Bryant T *et al*: Pediatric cardiac critical care transport and palliative care: A case series. *Am J Hosp Palliat Care*. 2021, 38(1):94-97.
173. Goldstein RF, Malcolm WF: Care of the neonatal intensive care unit graduate after discharge. *Pediatr Clin North Am*. 2019, 66(2):489-508.
174. Graham RJ, Amar-Dolan LR, Roussin CJ, Weinstock PH: Bridging the stressful gap between ICU and home: medical simulation for pediatric patients and their families. *Pediatr Crit Care Med*. 2019, 20(4):e221-e224.
175. Kennedy TK, Numa A: Factors associated with discharge delay and direct discharge home from paediatric intensive care. *J Paediatr Child Health*. 2020, 56(7):1101-1107.
176. Kroeger AR, Morrison J, Smith AH: Predicting unplanned readmissions to a pediatric cardiac intensive care unit using pre-discharge Pediatric Early Warning Scores. *Congenit Heart Dis*. 2018, 13(1):98-104.
177. Kulesa JT, Balsara SL, Ghebremariam ET, Colyer J: Designing a process for cardiology patient transfers: A quality improvement, descriptive study on interprovider communication and resident education. *Pediatr Qual Saf*. 2020, 5(3):e300.
178. Leyenaar JK, Desai AD, Burkhart Q, Parast L, Roth CP, McGalliard J *et al*: Quality measures to assess care transitions for hospitalized children. *Pediatrics*. 2016, 138(2).
179. Lobos A-T, Fernandes R, Williams K, Ramsay C, McNally JD: Routine medical emergency team assessments of patients discharged from the PICU: Description of a medical emergency team follow-up program. *Pediatr Crit Care Med*. 2015, 16(4):359-365.
180. Manente L, McCluskey T, Shaw R: Transitioning patients from the intensive care unit to the general pediatric unit: A piece of the puzzle in family-centered care. *Pediatr Nurs*. 2017, 43(2):77-82.
181. Moore M, Robinson G, Mink R, Hudson K, Dotolo D, Gooding T *et al*: Developing a family-centered care model for critical care after pediatric traumatic brain injury. *Pediatr Crit Care Med*. 2015, 16(8):758-765.
182. Neupane B, McFeeters M, Johnson E, Hickey H, Pandya H: Transitioning children requiring long-term ventilation from hospital to home: A practical guide. *Paediatr Child Health*. 2015, 25(4):187-191.
183. Noje C, Bernier ML, Costabile PM, Klein BL, Kudchadkar SR: Pediatric critical care transport as a conduit to terminal extubation at home: A case series. *Pediatr Crit Care Med*. 2017, 18(1):e4-e8.
184. Obas KA, Leal JM, Zegray M, Rennick JE: Parental perceptions of transition from intensive care following a child's cardiac surgery. *Nurs Crit Care*. 2016, 21(3):e1-9.
185. Orenstein EW, Ferro DF, Bonafide CP, Landrigan CP, Gillespie S, Muthu N: Hidden health IT hazards: a qualitative analysis of clinically meaningful documentation discrepancies at transfer out of the pediatric intensive care unit. *JAMIA open*. 2019, 2(3):392-398.
186. Sheth S, McCarthy E, Kipps AK, Wood M, Roth SJ, Sharek PJ *et al*: Changes in efficiency and safety culture after integration of an I-PASS-supported handoff process. *Pediatrics*. 2016, 137(2):e20150166.
187. Smith AH, Anand V, Banerjee M, Bates KE, Brunetti MA, Cooper DS *et al*: Variation in case-mix adjusted unplanned pediatric cardiac ICU readmission rates. *Crit Care Med*. 2018, 46(12):e1175-e1182.
188. Sobotka SA, Dholakia A, Agrawal RK, Berry JG, Brenner M, Graham RJ *et al*: Discharge practices for children with home mechanical ventilation across the United States. Key-informant perspectives. *Ann Am Thorac*. 2020, 17(11):1424-1430.
189. Vollmer A-M, Skonetzki-Cheng S, Prokosch H-U: Analysis of the interface and data transfer from ICU to normal wards in a German University Hospital. *Stud Health Technol Inform*. 2013, 192:1104.
190. Warrick D, Gonzalez-del-Rey J, Hall D, Statile A, White C, Simmons J *et al*: Improving resident handoffs for children transitioning from the intensive care unit. *Hospital Pediatrics*. 2015, 5(3):127-133.



191. Barone S, Boss RD, Raisanen JC, Shepard J, Donohue PK: Our life at home: Photos from families inform discharge planning for medically complex children. *Birth*. 2020.
192. Morton KE, Richardson A, Coombs MA, Darlington A-SE: Transferring critically ill babies and children home to die from intensive care. *Nurs Crit Care*. 2019, 24(4):222-228.
193. Amirani L, Namnabati M, Hajiheidari M: Examining the effect of discharge plan on enabling mothers of preterm babies admitted to the neonatal intensive care unit (NICU). *Ann Trop Med Public Health*. 2018, 13(Special Issue):SX746.
194. Aydon L, Hauck Y, Murdoch J, Siu D, Sharp M: Transition from hospital to home: Parents' perception of their preparation and readiness for discharge with their preterm infant. *J Clin Nurs*. 2018, 27(1-2):269-277.
195. Bapat R, McClead R, Shepherd E, Ryshen G, Bartman T: Challenges, successes and opportunities for reducing readmissions in a referral-based children's hospital NICU. *J Neonatal Perinatal Med*. 2016, 9(4):433-440.
196. Barkemeyer BM: Discharge planning. *Pediatr Clin North Am*. 2015, 62(2):545-556.
197. Bathie J, Shaw J: Early discharge home from the neonatal unit with the support of naso-gastric tube feeding. *J Neonatal Nurs*. 2013, 19(4):213-216.
198. Berman L, Raval MV, Ottosen M, Mackow AK, Cho M, Goldin AB: Parent perspectives on readiness for discharge home after neonatal intensive care unit admission. *J Pediatr*. 2019, 205:98-104.e104.
199. Bos LK, Shorey S, Kulantaipian TS, Sng JSP, Tam WWS, Koh SSL: Effectiveness of the neonatal discharge program for very low-birth-weight infants on parental efficacy and psychological distress. *J Perinat Neonatal Nurs*. 2018, 32(4):E11-E21.
200. Boss RD, Hobbs JE: Continuity of care for NICU graduates. *Contemp Pediatr*. 2013, 30(10):28-34.
201. Bowles JD, Jnah AJ, Newberry DM, Hubbard CA, Roberston T: Infants with technology dependence: facilitating the road to home. *Adv Neonatal Care*. 2016, 16(6):424-429.
202. Boykova M: Transition from hospital to home in preterm infants and their families. *J Perinat Neonatal Nurs*. 2016, 30(3):270-272.
203. Brodsgaard A, Zimmermann R, Petersen M: A preterm lifeline: Early discharge programme based on family-centred care. *J Spec Pediatr Nurs*. 2015, 20(4):232-243.
204. Buck CO, Tucker R, Vohr B, McGowan EC: Predictors of parenting readiness in fathers of high-risk infants in the neonatal intensive care unit. *J Pediatr*. 2020, 217:192-195.e191.
205. Burgoa-Larranaga SL, Iglesias-Leboreiro J, Bernardez-Zapata I: Early discharge of the healthy newborn from the nursery of the Hospital Español de México. *Rev Med Inst Mex Seguro Soc*. 2016, 54(6):696-705.
206. Burnham N, Feeley N, Sherrard K: Parents' perceptions regarding readiness for their infant's discharge from the NICU. *Neonatal Netw*. 2013, 32(5):324-334.
207. Carlos C, Hageman J, Pellerite M, McEntire B, Cote A, Raoux A *et al*: Neonatal intensive care unit discharge of infants with cardiorespiratory events: Tri-country comparison of academic centers. *J Neonatal Perinatal Med*. 2015, 8(4):307-311.
208. Carty CL, Soghier LM, Kritikos KI, Tuchman LK, Jiggetts M, Glass P *et al*: The giving parents support study: A randomized clinical trial of a parent navigator intervention to improve outcomes after neonatal intensive care unit discharge. *Contemp Clin Trials*. 2018, 70:117-134.
209. Chen Y, Zhang J, Bai J: Effect of an educational intervention on parental readiness for premature infant discharge from the neonatal intensive care units. *J Adv Nurs*. 2016, 72(1):135-146.
210. Coughlin K, Posencheg M, Orfe L, Zachritz W, Meadow J, Yang K *et al*: Reducing Variation in the Management of Apnea of Prematurity in the Intensive Care Nursery. *Pediatrics*. 2020, 145(2).
211. Cresi F, Cocchi E, Maggiora E, Pirra A, Logrippo F, Ariotti MC *et al*: Pre-discharge cardiorespiratory monitoring in preterm infants. the CORE study. *Front Pediatr*. 2020, 8:234.

212. Daicampi C, Comoretto RI, Soriani N, Lolli E, Boschetto S, Cecchin M *et al*: Protocols for early discharging of premature infants: an empirical assessment on safety and savings. *J Perinat Med*. 2019, 47(8):885-893.
213. Driscoll C, El Metwally D: A daily huddle facilitates patient transports from a neonatal intensive care unit. *BMJ Qual Improv Rep*. 2014, 3(1).
214. Enlow E, Herbert SL, Jovel IJ, Lorch SA, Anderson C, Chamberlain LJ: Neonatal intensive care unit to home: the transition from parent and pediatrician perspectives, a prospective cohort study. *J Perinatol*. 2014, 34(10):761-766.
215. Enlow E, Faherty LJ, Wallace-Keeshen S, Martin AE, Shea JA, Lorch SA: Perspectives of low socioeconomic status mothers of premature infants. *Pediatrics*. 2017, 139(3).
216. Enlow E, Gray MM, Wallace-Keeshen S, D'Agostino JA, Abbasi S, Lorch SA: Health literacy of parents of very preterm infants at NICU admission and discharge: a prospective cohort study. *J Perinatol*. 2019, 39(6):866-875.
217. Ermarth A, Thomas D, Ling CY, Cardullo A, White BR: Effective tube weaning and predictive clinical characteristics of NICU patients with feeding dysfunction. *JPEN J Parenter Enteral Nutr*. 2020, 44(5):920-927.
218. Feehan K, Kehinde F, Sachs K, Mossabeh R, Berhane Z, Pachter LM *et al*: Development of a multidisciplinary medical home program for NICU graduates. *Matern Child Health J*. 2020, 24(1):11-21.
219. Fleming PJ, Ingram J, Johnson D, Blair PS: Estimating discharge dates using routinely collected data: improving the preparedness of parents of preterm infants for discharge home. *Arch Dis Child Fetal Neonatal Ed*. 2017, 102(2):F170-F172.
220. Gad A, Parkinson E, Khawar N, Elmeki A, Narula P, Hoang D: Perspectives and attitudes of pediatricians concerning post-discharge care practice of premature infants. *J Neonatal Perinatal Med*. 2017, 10(1):99-107.
221. Garfield CF, Lee Y, Kim HN: Paternal and maternal concerns for their very low-birth-weight infants transitioning from the NICU to home. *J Perinat Neonatal Nurs*. 2014, 28(4):305-312.
222. Giudici L, Rodriguez D, Alonso MM, Bertani G, Cattaino A, Fernandez P *et al*: Guidelines for discharge planning of the high risk newborn. *Arch Argent Pediatr*. 2018, 116(4):S77-S81.
223. Goldin AB, Raval MV, Thurm CW, Hall M, Billimoria Z, Juul S *et al*: The resource use inflection point for safe NICU discharge. *Pediatrics*. 2020, 146(2).
224. Granero-Molina J, Fernandez Medina IM, Fernandez-Sola C, Hernandez-Padilla JM, Jimenez Lasserrotte MDM, Lopez Rodriguez MDM: Experiences of mothers of extremely preterm infants after hospital discharge. *J Pediatr Nurs*. 2019, 45:e2-e8.
225. Gupta M, Pursley DM, Smith VC: Preparing for discharge from the neonatal intensive care unit. *Pediatrics*. 2019, 143(6).
226. Hobbs JE, Tschudy MM, Hussey-Gardner B, Jennings JM, Boss RD: "I don't know what I was expecting": Home visits by neonatology fellows for infants discharged from the NICU. *Birth*. 2017, 44(4):331-336.
227. Ingram JC, Powell JE, Blair PS, Pontin D, Redshaw M, Manns S *et al*: Does family-centred neonatal discharge planning reduce healthcare usage? A before and after study in South West England. *BMJ Open*. 2016, 6(3):e010752.
228. Jefferies AL, Canadian Paediatric Society F, Newborn C: Going home: Facilitating discharge of the preterm infant. *Paediatr Child Health*. 2014, 19(1):31-42.
229. Kim JS, Shim JW, Lee JH, Chang YS, Committee on Data C, Statistical Analysis tKSoN: Comparison of follow-up courses after discharge from neonatal intensive care unit between very low birth weight infants with and without home oxygen. *J Korean Med Sci*. 2017, 32(8):1295-1303.
230. Lakshmanan A, Kubicek K, Williams R, Robles M, Vanderbilt DL, Mirzaian CB *et al*: Viewpoints from families for improving transition from NICU-to-home for infants with medical complexity at a safety net hospital: a qualitative study. *BMC Pediatr*. 2019, 19(1):223.
231. Lau R, Crump RT, Brousseau DC, Panepinto JA, Nicholson M, Engel J *et al*: Parent preferences regarding home oxygen sse for infants with bronchopulmonary dysplasia. *J Pediatr*. 2019, 213:30-37.e33.

232. Lee SY, Chau JPC, Choi KC, Lo SHS: Feasibility of a guided participation discharge program for very preterm infants in a neonatal intensive care unit: a randomized controlled trial. *BMC Pediatr.* 2019, 19(1):402.
233. Litt JS, Agni M, Jacobi-Polishook T, Melvin P, McCormick MC, Stewart JE *et al*: The acceptability and feasibility of emailed parent questionnaires for medical and developmental surveillance after NICU discharge. *J Perinatol.* 2018, 38(4):392-401.
234. Lovejoy-Bluem A: Neonatal intensive care unit discharge transitioning: Nursing practices, perspectives, and perceptions. Brandman University; 2014.
235. Lundberg B, Lindgren C, Palme-Kilander C, Örténstrand A, Bonamy AKE, Sarman I: Hospital-assisted home care after early discharge from a Swedish neonatal intensive care unit was safe and readmissions were rare. *Acta Paediatrica.* 2016, 105(8):895-901.
236. McGowan EC, Du N, Hawes K, Tucker R, O'Donnell M, Vohr B: Maternal mental health and neonatal intensive care unit readiness in mothers of preterm infants. *J Pediatr.* 2017, 184:68-74.
237. McGowan EC, Abdulla LS, Hawes KK, Tucker R, Vohr BR: Maternal immigrant status and readiness to transition to home from the NICU. *Pediatrics.* 2019, 143(5).
238. Moyer VA, Papile L-A, Eichenwald E, Giardino AP, Khan MM, Singh H: An intervention to improve transitions from NICU to ambulatory care: quasi-experimental study. *BMJ Qual Saf.* 2014, 23(12):1-7.
239. Murphy S, Ehritz C: Clinical nurse specialist practice strategies for children with medical complexity. *Clin Nurse Spec.* 2021, 35(1):38-43.
240. Murray CH, Joseph RA: Transition from NICU to home: are the parents ready to manage any emergency? An evidence-based project. *Neonatal Netw.* 2016, 35(3):151-155.
241. Noble LM, Okogbule-Wonodi AC, Young MA: ABM Clinical Protocol #12: Transitioning the breastfeeding preterm infant from the neonatal intensive care unit to home. *Breastfeed Med.* 2018, 13(4):230-236.
242. Osorio Galeano SP, Ochoa Marin SC, Semenic S: Preparing for post-discharge care of premature infants: Experiences of parents. *Investigacion y educacion en enfermeria.* 2017, 35(1):100-106.
243. Peacock JJ: Discharge summary for medically complex infants transitioning to primary care. *Neonatal Netw.* 2014, 33(4):204-207.
244. Peyrovi H, Mosayebi Z, Mohammad-Doost F, Chehrzad M-M, Mehran A: The effect of empowerment program on "perceived readiness for discharge" of mothers of premature infants. *J Matern Fetal Neonatal Med.* 2016, 29(5):752-757.
245. Pineda R, Heiny E, Nellis P, Smith J, McGrath JM, Collins M *et al*: The Baby Bridge program: A sustainable program that can improve therapy service delivery for preterm infants following NICU discharge. *PLoS One.* 2020, 15(5):e0233411.
246. Purdy IB, Craig JW, Zeanah P: NICU discharge planning and beyond: recommendations for parent psychosocial support. *J Perinatol.* 2015, 35 Suppl 1:S24-28.
247. Quinn JM, Sparks M, Gephart SM: Discharge criteria for the late preterm infant: A review of the literature. *Adv Neonatal Care.* 2017, 17(5):362-371.
248. Raffray M, Semenic S, Galeano SO, Ochoa Marin SC: Barriers and facilitators to preparing families with premature infants for discharge home from the neonatal unit: Perceptions of health care providers. *Investigacion & Educacion en Enfermeria.* 2014, 32(3):379-392.
249. Raines DA: Mothers' stressor as the day of discharge from the NICU approaches. *Adv Neonatal Care.* 2013, 13(3):181-187.
250. Raines DA: Preparing for NICU discharge: mothers' concerns. *Neonatal Netw.* 2013, 32(6):399-403.
251. Raines DA: Simulation as part of discharge teaching for parents of infants in the neonatal intensive care unit. *MCN Am J Matern Child Nurs.* 2017, 42(2):95-100.
252. Reichert J, Eulerich-Gyamerah S, Poets C, Kribs A, Roth B, Kuhn T *et al*: Psychological sociomedical care in neonatology. *Monatsschr Kinderheilkd.* 2014, 162(11):1010-1017.
253. Sabzevari S, Pouraboli B, Zade ZA, Nematollahi M, Dehesh T: Assessing the implementation of discharge planning on mothers' hope and satisfaction of preterm newborns in NICU. *i-Managers Journal on Nursing.* 2019, 8(4):1-9.

254. Schell S, Kase JS, Parvez B, Shah SI, Meng H, Grzybowski M *et al*: Maturational, comorbid, maternal and discharge domain impact on preterm rehospitalizations: a comparison of planned and unplanned rehospitalizations. *J Perinatol*. 2016, 36(4):317-324.
255. Serlachius A, Hames J, Juth V, Garton D, Rowley S, Petrie KJ: Parental experiences of family-centred care from admission to discharge in the neonatal intensive care unit. *J Paediatr Child Health*. 2018, 54(11):1227-1233.
256. Setiawan J, Mannix T, Sweet L: Understanding the effects of neonatal early discharge on parents: A literature review. *J Perinat Neonatal Nurs*. 2019, 33(2):170-188.
257. Seyedfarajollah S, Nayeri F, Kalhori SRN, Ghazisaeedi M, Keikha L: The Framework of NICU-discharge plan system for preterm infants in Iran: Duties, components and capabilities. *Acta Inform Med*. 2018, 26(1):46-50.
258. Smith VC: Discharge planning considerations for the neonatal intensive care unit. *Arch Dis Child Fetal Neonatal Ed*. 2020.
259. Snelling CH: Homeward Bound. *OT Practice*. 2014, 19(6):14-17.
260. Sommer CM, Cook CM: Disrupted bonds - parental perceptions of regionalised transfer of very preterm infants: a small-scale study. *Contemp Nurse*. 2015, 50(2-3):256-266.
261. Stanojevic M: School for parents - Preparation of preterm infants for discharge from the hospital. *Paediatr Croat Suppl*. 2018, 62(Supplement 1):80-85.
262. Temple MW, Lehmann CU, Fabbri D: Predicting discharge dates from the NICU using progress note data. *Pediatrics*. 2015, 136(2):e395-405.
263. Toly VB, Blanchette JE, Alhamed A, Musil CM: Mothers' voices related to caregiving: The transition of a technologydependent infant from the NICU to home. *Neonatal Netw*. 2019, 38(2):69-79.
264. Toral-Lopez I, Fernandez-Alcantara M, Gonzalez-Carrion P, Cruz-Quintana F, Rivas-Campos A, Perez-Marfil N: Needs perceived by parents of preterm infants: Integrating care into the early discharge process. *J Pediatr Nurs*. 2016, 31(2):e99-e108.
265. Toral-Lopez I, Gonzalez-Carrion MP, Rivas-Campos A, Lafuente-Lorca J, Castillo-Vera J, de Casas C *et al*: Evolution of care indicators after an early discharge intervention in preterm infants. *Enferm Clin*. 2017, 27(4):235-240.
266. Turner M, Winefield H, Chur-Hansen A: The emotional experiences and supports for parents with babies in a neonatal nursery. *Adv Neonatal Care*. 2013, 13(6):438-446.
267. van Kampen F, de Mol A, Korstanje J, Groof FM-d, van Meurs-Asseler L, Stas H *et al*: Early discharge of premature infants < 37 weeks gestational age with nasogastric tube feeding: the new standard of care? *Eur J Pediatr*. 2019, 178(4):497-503.
268. Veronez M, Borghesan NAB, Correa DAM, Higarashi IH: Experience of mothers of premature babies from birth to discharge: notes of field journals. *Rev Gaucha Enferm*. 2017, 38(2):e60911.
269. Vohr B, McGowan E, Keszler L, O'Donnell M, Hawes K, Tucker R: Effects of a transition home program on preterm infant emergency room visits within 90 days of discharge. *J Perinatol*. 2018, 38(2):185-190.
270. Voie MP, Tunby J, Stromsvik N: Collaboration challenges faced by nurses when premature infants are discharged. *Nursing Children and Young People*. 2018, 30(2):33-38.
271. Vonderheid Sc RKNKVRHSW-TR: Health care use outcomes of an integrated hospital-to-home mother-preterm infant intervention. *JOGNN - J Obstet Gynecol Neonatal Nurs*. 2016, 45(5):625.
272. Walter L, Robb M: Promoting discharge readiness through staff education: A family-centered approach. *J Nurses Prof Dev*. 2019, 35(3):132-136.
273. Waruingi W, Iyer S, Collin M: Improving health care usage in a very low birth weight population. *World J Pediatr*. 2015, 11(3):239-244.
274. Weiqing S, Jianglan Y, Hong XU: Application of family - centered care model in discharge guidance of premature infants. *Chinese Nursing Research*. 2013, 27(4A):867-869.
275. Wellington G, Campbell AJ, Elder DE: Oximetry for preterm infants at neonatal discharge: What is current practice in New Zealand and Australia? *J Paediatr Child Health*. 2016, 52(3):333-337.

276. White BR, Ermarth A, Thomas D, Arguinchona O, Presson AP, Ling CY: Creation of a standard model for tube feeding at neonatal intensive care unit discharge. *JPEN J Parenter Enteral Nutr.* 2020, 44(3):491-499.
277. Willard A, Brown E, Masten M, Brant M, Pouppirt N, Moran K *et al*: Complexsurgical infants benefit from postdischarge telemedicine visits. *Adv Neonatal Care.* 2018, 18(1):22-30.
278. Williams G, Bada H, Chesnut L, Ferrell E, Mays GP: Examining the trade-off between NICU length of stay and postdischarge monitoring: An instrumental variables approach. *J Healthc Manag.* 2018, 63(5):301-311.
279. Xiu-Xiang H, Shun-Ying W: A nursing experience of assisting discharge planning for a mother of a premature infant. *Tzu Chi Nursing Journal.* 2013, 12(3):110-119.
280. Zahn SO, Tobison JH, Place AJ, Casey JN, Hess L, Foster T: Impact of a process change on prevalence of prescribed unmeasurable liquid doses in a neonatal intensive care unit. *J Pediatr Pharmacol Ther.* 2020, 25(2):96-103.
281. Zamanzadeh V, Namnabati M, Valizadeh L, Badiie Z: Professional's efforts to simultaneously discharge infants and mother from neonatal intensive care unit in Iran: A qualitative study. *J Caring Sci.* 2013, 2(1):39-45.
282. Zamanzadeh V, Namnabati M, Valizadeh L, Badiie Z: Mothers' experiences of infants discharge in Iranian NICU culture: a qualitative study. *Adv Neonatal Care.* 2013, 13(4):E1-7.
283. Zimmerman K: Discharge readiness for families with a premature infant living in Appalachia. East Tennessee State University; 2017.
284. Attfeld E, Swankhuizen MP, Bruchet N, Slavik R, Gorman SK: Improving the clinical pharmacist handover process in the intensive care unit with a pharmacotherapy-specific tool: The I-HAPPY study. *Can J Hosp Pharm.* 2018, 71(2):111-118.
285. Busico M, das Neves A, Carini F, Pedace M, Villalba D, Foster C *et al*: Follow-up program after intensive care unit discharge. *Med Intensiva.* 2019, 43(4):243-254.
286. Cognet S, Coyer F: Discharge practices for the intensive care patient: a qualitative exploration in the general ward setting. *Intensive Crit Care Nurs.* 2014, 30(5):292-292.
287. Coombs MA, Darlington A-S, Long-Sutehall T, Richardson A: Transferring critically ill patients home to die: developing a clinical guidance document. *Nurs Crit Care.* 2015, 20(5):264-270.
288. Cullinane JP, Plowright CI: Patients' and relatives' experiences of transfer from intensive care unit to wards. *Nurs Crit Care.* 2013, 18(6):289-296.
289. de Grood C, Job McIntosh C, Boyd JM, Zjadewicz K, Parsons Leigh J, Stelfox HT: Identifying essential elements to include in Intensive Care Unit to hospital ward transfer summaries: A consensus methodology. *J Crit Care.* 2019, 49:27-32.
290. Elliott M, Worrall-Carter L, Page K: Factors contributing to adverse events after ICU discharge: a survey of liaison nurses. *Aust Crit Care.* 2013, 26(2):76-80.
291. Frølund C, Beedholm K: Erfaring og kompleksitet -- en kvalitativ undersøgelse af betydningsfulde forhold hos sygeplejerskerne ved overflytning af patienter fra intensiv til sengeafdeling. Experience and complexity - A qualitative study of conditions of significance for nurses during patient transition from the intensive care unit to the general ward. *Vard Nord Utveckl Forsk.* 2013, 33(4):9-13.
292. Guest M: Patient transfer from the intensive care unit to a general ward. *Nurs Stand.* 2017, 32(10):45-51.
293. Häggström M, Asplund K, Kristiansen L: To reduce technology prior discharge from intensive care - important but difficult? A grounded theory. *Scand J Caring Sci.* 2013, 27(3):506-515.
294. Haggstrom M, Backstrom B: Organizing safe transitions from intensive care. *Nurs Res Pract.* 2014, 2014:175314.
295. Hall W, Keane P, Wang S, Debell F, Allana A, Karia P: Intensive care discharges: improving the quality of clinical handover through changes to discharge documentation. *BMJ Qual Improv Rep.* 2015, 4(1).

296. Johnson DW, Schmidt UH, Bittner EA, Christensen B, Levi R, Pino RM: Delay of transfer from the intensive care unit: a prospective observational study of incidence, causes, and financial impact. *Crit Care*. 2013, 17(4):R128.
297. Kauppi W, Proos M, Olausson S: Ward nurses' experiences of the discharge process between intensive care unit and general ward. *Nurs Crit Care*. 2018, 23(3):127-133.
298. Kowitlawakul Y, Leong BSH, Lua A, Aroos R, Wong JJ, Koh N *et al*: Observation of handover process in an intensive care unit (ICU): barriers and quality improvement strategy. *Int J Qual Health Care*. 2015, 27(2):99-104.
299. Kraus S, Castellanos I, Albermann M, Schuettler C, Prokosch H-U, Staudigel M *et al*: Using Arden Syntax for the generation of intelligent intensive care discharge letters. *Stud Health Technol Inform*. 2016, 228:471-475.
300. Kumar P: Improving timely medical reviews for patients discharged from intensive care. *BMJ Qual Improv Rep*. 2015, 4(1).
301. Kwon H-K, Song M: Role adaptation processes of family caregivers with patients transferred from intensive care unit to general ward: Becoming almost a nurse with hope and fear. *Korean Journal of Adult Nursing*. 2014, 26(6):603-613.
302. Lin F, Chaboyer W, Wallis M: Understanding the distributed cognitive processes of intensive care patient discharge. *J Clin Nurs*. 2014, 23(5-6):673-682.
303. Lin F, Chaboyer W, Wallis M, Miller A: Factors contributing to the process of intensive care patient discharge: an ethnographic study informed by activity theory. *Int J Nurs Stud*. 2013, 50(8):1054-1066.
304. Ludin SM, Parker S, Arbon P: A survey of Malaysian critical intensive care unit nurses' awareness of patients' transition experiences (PE) and transitional care practice (TCP). *Intensive Crit Care Nurs*. 2014, 30(4):196-203.
305. McNett M, McLaughlin D: Transitions of care for patients with neurologic diagnoses transition from the intensive care unit to the floor. *Nurs Clin North Am*. 2019, 54(3):347-355.
306. Messing J: Improving handover from intensive care to ward medical teams with simple changes to paperwork. *BMJ Qual Improv Rep*. 2015, 4(1).
307. Morgan DJR, Ho KM: Impact of intensive care unit admission and discharge times on adverse outcomes after planned surgical cases. Response to *Br J Anaesth* 2018; 120: 1153-4. *Br J Anaesth*. 2018, 121(4):981-982.
308. Nates JL, Nunnally M, Kleinpell R, Blosser S, Goldner J, Birriel B *et al*: ICU admission, discharge, and triage guidelines: A framework to enhance clinical operations, development of institutional policies, and further research. *Crit Care Med*. 2016, 44(8):1553-1602.
309. Reader TW, Reddy G, Brett SJ: Impossible decision? An investigation of risk trade-offs in the intensive care unit. *Ergonomics*. 2018, 61(1):122-133.
310. Teixeira C, Rosa RG: Post-intensive care outpatient clinic: is it feasible and effective? A literature review. *Rev Bras Ter Intensiva*. 2018, 30(1):98-111.
311. Turnbull AE, Davis WE, Needham DM, White DB, Eakin MN: Intensivist-reported facilitators and barriers to discussing post-discharge outcomes with intensive care unit surrogates. A qualitative study. *Ann Am Thorac*. 2016, 13(9):1546-1552.
312. Vijayaraghavan BKT, Willaert X, Cuthbertson BH: Should ICU clinicians follow patients after ICU discharge? No. *Intensive Care Med*. 2018, 44(9):1542-1544.
313. Wong DJ, Wickham AJ: A survey of intensive care unit discharge communication practices in the UK. *J Intensive Care Soc*. 2013, 14(4):330-333.
314. Yuan C, Timmins F, Thompson DR: Post-intensive care syndrome: A concept analysis. *Int J Nurs Stud*. 2020, 114:103814.
