# Supplementary material for: Patient discharge from intensive care: an updated scoping review to identify tools and practices to inform high-quality care
Source: PubMed Central journal article supplement (PMC8684123; doi:10.1186/s13054-021-03857-2), 2021-12-17
Supplement: 13054_2021_3857_MOESM5_ESM.pdf [file 13054_2021_3857_MOESM5_ESM.pdf]

**Additional File 5** - Discharge themes of articles included in the review.

| <b>Theme</b>                                                           | <b>All studies,<br/>n(%) (N=314)</b> |
|------------------------------------------------------------------------|--------------------------------------|
| Adverse events, readmission, and mortality following discharge         | 116 (36.9)                           |
| Patient and family needs and experiences during discharge              | 112 (35.7)                           |
| Planning for discharge                                                 | 95 (30.3)                            |
| Continuity of patient care                                             | 84 (26.8)                            |
| Discharge education for patients and families                          | 72 (22.9)                            |
| Standardizing the discharge process                                    | 60 (19.1)                            |
| Availability of complete and accurate discharge information            | 58 (18.5)                            |
| Evaluating patient readiness for discharge                             | 58 (18.5)                            |
| Anxiety associated with discharge                                      | 56 (17.8)                            |
| Timeliness of discharge (time of day of discharge, delay in discharge) | 53 (16.9)                            |
| Resource use during discharge                                          | 41 (13.1)                            |
| Critical care transition program (nurse liaison, outreach team)        | 39 (12.4)                            |
| Medication reconciliation                                              | 24 (7.6)                             |
| Autonomy                                                               | 20 (6.4)                             |
| Discharge education for providers                                      | 17 (5.4)                             |

Note: Responses are not mutually exclusive, and therefore, add up to more than 100%
